# Supplementary material
Source: publisher figshare collection journal article supplement (https://acs.figshare.com/ndownloader/files/14760104)
Supplement: Supplementary file 1 [file 14760104]

## Sheet: Full
Table S3 (A): Full data set of missense SNPs located on KVs (2035 SNPs), CaVs (741 SNPs) and NaVs (2535 SNPs). This excel sheet named "Full" contains a data set of unique SNPs from both databases (5311 SNPs). The excel sheet "UniProt" contains all SNPs isolated from UniProtKB and the excel sheet "ClinVar" contains SNPs isolated from ClinVar (more details regarding the assembly of this data set ca…
Final Data set
#	Channel Type	Gene Name	AC	AA Before	Position	AA After	Status
1	CaV	CACNA1A	O00555	A	1507	S	Pathogenic
2	CaV	CACNA1A	O00555	A	21	V	Polymorphism
3	CaV	CACNA1A	O00555	A	2436	T	Unclassified
4	CaV	CACNA1A	O00555	A	405	T	Pathogenic
5	CaV	CACNA1A	O00555	A	453	T	Polymorphism
6	CaV	CACNA1A	O00555	A	712	T	Pathogenic
7	CaV	CACNA1A	O00555	C	1868	R	Pathogenic
8	CaV	CACNA1A	O00555	C	256	R	Pathogenic
9	CaV	CACNA1A	O00555	C	287	Y	Pathogenic
10	CaV	CACNA1A	O00555	D	1337	Y	Pathogenic
11	CaV	CACNA1A	O00555	D	714	E	Pathogenic
12	CaV	CACNA1A	O00555	E	101	Q	Pathogenic
13	CaV	CACNA1A	O00555	E	1014	K	Polymorphism
14	CaV	CACNA1A	O00555	E	1755	K	Pathogenic
15	CaV	CACNA1A	O00555	E	388	K	Pathogenic
16	CaV	CACNA1A	O00555	E	731	A	Polymorphism
17	CaV	CACNA1A	O00555	E	917	D	Polymorphism
18	CaV	CACNA1A	O00555	E	992	V	Polymorphism
19	CaV	CACNA1A	O00555	F	1402	C	Pathogenic
20	CaV	CACNA1A	O00555	F	1489	S	Pathogenic
21	CaV	CACNA1A	O00555	G	1104	S	Polymorphism
22	CaV	CACNA1A	O00555	G	1481	R	Pathogenic
23	CaV	CACNA1A	O00555	G	293	R	Pathogenic
24	CaV	CACNA1A	O00555	G	637	D	Pathogenic
25	CaV	CACNA1A	O00555	H	1735	L	Pathogenic
26	CaV	CACNA1A	O00555	H	253	Y	Pathogenic
27	CaV	CACNA1A	O00555	I	1809	L	Pathogenic
28	CaV	CACNA1A	O00555	K	1334	E	Pathogenic
29	CaV	CACNA1A	O00555	L	389	F	Pathogenic
30	CaV	CACNA1A	O00555	M	797	T	Pathogenic
31	CaV	CACNA1A	O00555	P	1172	L	Polymorphism
32	CaV	CACNA1A	O00555	P	2395	S	Polymorphism
33	CaV	CACNA1A	O00555	P	896	R	Pathogenic
34	CaV	CACNA1A	O00555	P	913	S	Polymorphism
35	CaV	CACNA1A	O00555	R	1345	Q	Pathogenic
36	CaV	CACNA1A	O00555	R	1660	H	Pathogenic
37	CaV	CACNA1A	O00555	R	1663	Q	Pathogenic
38	CaV	CACNA1A	O00555	R	1666	W	Pathogenic
39	CaV	CACNA1A	O00555	R	1672	P	Pathogenic
40	CaV	CACNA1A	O00555	R	1678	C	Pathogenic
41	CaV	CACNA1A	O00555	R	192	Q	Pathogenic
42	CaV	CACNA1A	O00555	R	195	K	Pathogenic
43	CaV	CACNA1A	O00555	R	2134	C	Pathogenic
44	CaV	CACNA1A	O00555	R	582	Q	Pathogenic
45	CaV	CACNA1A	O00555	S	218	L	Pathogenic
46	CaV	CACNA1A	O00555	T	500	M	Pathogenic
47	CaV	CACNA1A	O00555	T	665	M	Pathogenic
48	CaV	CACNA1A	O00555	V	1455	L	Pathogenic
49	CaV	CACNA1A	O00555	V	1492	I	Pathogenic
50	CaV	CACNA1A	O00555	V	1694	I	Pathogenic
51	CaV	CACNA1A	O00555	V	713	A	Pathogenic
52	CaV	CACNA1A	O00555	W	1435	R	Pathogenic
53	CaV	CACNA1A	O00555	W	1682	R	Pathogenic
54	CaV	CACNA1A	O00555	Y	1383	C	Pathogenic
55	CaV	CACNA1A	O00555	Y	248	C	Pathogenic
56	CaV	CACNA1B	Q00975	A	862	S	Polymorphism
57	CaV	CACNA1B	Q00975	E	1436	K	Polymorphism
58	CaV	CACNA1B	Q00975	E	1500	K	Polymorphism
59	CaV	CACNA1B	Q00975	M	1516	I	Unclassified
60	CaV	CACNA1B	Q00975	N	167	K	Polymorphism
61	CaV	CACNA1B	Q00975	R	1389	H	Pathogenic
62	CaV	CACNA1B	Q00975	S	1745	G	Unclassified
63	CaV	CACNA1B	Q00975	T	996	A	Polymorphism
64	CaV	CACNA1B	Q00975	Y	59	H	Unclassified
65	CaV	CACNA1C	Q13936	A	1365	T	Polymorphism
66	CaV	CACNA1C	Q13936	A	1765	G	Polymorphism
67	CaV	CACNA1C	Q13936	A	2091	S	Unclassified
68	CaV	CACNA1C	Q13936	A	2122	G	Polymorphism
69	CaV	CACNA1C	Q13936	A	2169	T	Polymorphism
70	CaV	CACNA1C	Q13936	A	28	T	Unclassified
71	CaV	CACNA1C	Q13936	A	39	V	Unclassified
72	CaV	CACNA1C	Q13936	A	582	D	Pathogenic
73	CaV	CACNA1C	Q13936	A	752	T	Polymorphism
74	CaV	CACNA1C	Q13936	D	1787	N	Polymorphism
75	CaV	CACNA1C	Q13936	E	1544	K	Pathogenic
76	CaV	CACNA1C	Q13936	E	1948	K	Polymorphism
77	CaV	CACNA1C	Q13936	E	477	K	Polymorphism
78	CaV	CACNA1C	Q13936	G	1831	C	Unclassified
79	CaV	CACNA1C	Q13936	G	1843	A	Polymorphism
80	CaV	CACNA1C	Q13936	G	37	R	Polymorphism
81	CaV	CACNA1C	Q13936	G	402	S	Pathogenic
82	CaV	CACNA1C	Q13936	G	406	R	Pathogenic
83	CaV	CACNA1C	Q13936	G	490	R	Unclassified
84	CaV	CACNA1C	Q13936	I	1186	T	Pathogenic
85	CaV	CACNA1C	Q13936	I	1186	V	Pathogenic
86	CaV	CACNA1C	Q13936	I	1523	M	Pathogenic
87	CaV	CACNA1C	Q13936	I	304	T	Polymorphism
88	CaV	CACNA1C	Q13936	I	391	L	Polymorphism
89	CaV	CACNA1C	Q13936	K	1893	R	Polymorphism
90	CaV	CACNA1C	Q13936	L	614	P	Unclassified
91	CaV	CACNA1C	Q13936	M	1869	V	Polymorphism
92	CaV	CACNA1C	Q13936	M	456	I	Unclassified
93	CaV	CACNA1C	Q13936	N	2174	S	Polymorphism
94	CaV	CACNA1C	Q13936	P	1868	L	Polymorphism
95	CaV	CACNA1C	Q13936	P	381	S	Unclassified
96	CaV	CACNA1C	Q13936	P	817	S	Polymorphism
97	CaV	CACNA1C	Q13936	Q	84	R	Polymorphism
98	CaV	CACNA1C	Q13936	R	1159	H	Unclassified
99	CaV	CACNA1C	Q13936	R	1972	C	Polymorphism
100	CaV	CACNA1C	Q13936	R	2056	Q	Polymorphism
101	CaV	CACNA1C	Q13936	R	24	H	Unclassified
102	CaV	CACNA1C	Q13936	R	518	C	Pathogenic
103	CaV	CACNA1C	Q13936	R	518	H	Pathogenic
104	CaV	CACNA1C	Q13936	R	858	H	Pathogenic
105	CaV	CACNA1C	Q13936	R	860	G	Pathogenic
106	CaV	CACNA1C	Q13936	S	878	R	Unclassified
107	CaV	CACNA1C	Q13936	T	1800	I	Unclassified
108	CaV	CACNA1C	Q13936	T	1835	M	Polymorphism
109	CaV	CACNA1C	Q13936	T	1953	M	Unclassified
110	CaV	CACNA1C	Q13936	T	2081	N	Polymorphism
111	CaV	CACNA1C	Q13936	V	1755	I	Polymorphism
112	CaV	CACNA1C	Q13936	V	2097	I	Unclassified
113	CaV	CACNA1D	Q01668	A	749	G	Pathogenic
114	CaV	CACNA1D	Q01668	D	2097	N	Polymorphism
115	CaV	CACNA1D	Q01668	G	403	D	Pathogenic
116	CaV	CACNA1D	Q01668	G	403	R	Pathogenic
117	CaV	CACNA1D	Q01668	G	407	R	Pathogenic
118	CaV	CACNA1D	Q01668	I	750	M	Pathogenic
119	CaV	CACNA1D	Q01668	V	401	L	Pathogenic
120	CaV	CACNA1E	Q15878	A	1955	T	Polymorphism
121	CaV	CACNA1E	Q15878	A	702	T	Unclassified
122	CaV	CACNA1E	Q15878	D	859	E	Polymorphism
123	CaV	CACNA1E	Q15878	F	698	S	Pathogenic
124	CaV	CACNA1E	Q15878	G	1430	R	Unclassified
125	CaV	CACNA1E	Q15878	G	690	D	Unclassified
126	CaV	CACNA1E	Q15878	R	879	W	Unclassified
127	CaV	CACNA1E	Q15878	S	851	G	Unclassified
128	CaV	CACNA1E	Q15878	V	2010	M	Unclassified
129	CaV	CACNA1F	O60840	A	1259	T	Polymorphism
130	CaV	CACNA1F	O60840	A	1270	T	Polymorphism
131	CaV	CACNA1F	O60840	A	547	T	Pathogenic
132	CaV	CACNA1F	O60840	A	928	D	Pathogenic
133	CaV	CACNA1F	O60840	C	1040	R	Polymorphism
134	CaV	CACNA1F	O60840	C	1499	R	Pathogenic
135	CaV	CACNA1F	O60840	C	74	R	Pathogenic
136	CaV	CACNA1F	O60840	D	1954	N	Unclassified
137	CaV	CACNA1F	O60840	E	1387	D	Unclassified
138	CaV	CACNA1F	O60840	F	753	C	Pathogenic
139	CaV	CACNA1F	O60840	G	1001	R	Unclassified
140	CaV	CACNA1F	O60840	G	1018	E	Pathogenic
141	CaV	CACNA1F	O60840	G	1018	R	Pathogenic
142	CaV	CACNA1F	O60840	G	1405	S	Polymorphism
143	CaV	CACNA1F	O60840	G	150	R	Pathogenic
144	CaV	CACNA1F	O60840	G	1684	W	Polymorphism
145	CaV	CACNA1F	O60840	G	261	R	Pathogenic
146	CaV	CACNA1F	O60840	G	31	R	Unclassified
147	CaV	CACNA1F	O60840	G	369	D	Pathogenic
148	CaV	CACNA1F	O60840	G	603	R	Pathogenic
149	CaV	CACNA1F	O60840	G	674	D	Pathogenic
150	CaV	CACNA1F	O60840	G	826	V	Unclassified
151	CaV	CACNA1F	O60840	G	848	S	Pathogenic
152	CaV	CACNA1F	O60840	G	933	S	Unclassified
153	CaV	CACNA1F	O60840	H	638	Y	Unclassified
154	CaV	CACNA1F	O60840	I	656	F	Unclassified
155	CaV	CACNA1F	O60840	I	756	T	Pathogenic
156	CaV	CACNA1F	O60840	L	1079	P	Pathogenic
157	CaV	CACNA1F	O60840	L	1375	H	Pathogenic
158	CaV	CACNA1F	O60840	L	1508	P	Pathogenic
159	CaV	CACNA1F	O60840	L	860	P	Pathogenic
160	CaV	CACNA1F	O60840	M	1	L	Unclassified
161	CaV	CACNA1F	O60840	N	1071	K	Pathogenic
162	CaV	CACNA1F	O60840	N	746	T	Polymorphism
163	CaV	CACNA1F	O60840	P	14	L	Polymorphism
164	CaV	CACNA1F	O60840	P	1491	L	Pathogenic
165	CaV	CACNA1F	O60840	P	1500	R	Pathogenic
166	CaV	CACNA1F	O60840	P	1572	Q	Unclassified
167	CaV	CACNA1F	O60840	P	191	A	Unclassified
168	CaV	CACNA1F	O60840	P	348	S	Unclassified
169	CaV	CACNA1F	O60840	Q	1625	R	Unclassified
170	CaV	CACNA1F	O60840	Q	1762	H	Unclassified
171	CaV	CACNA1F	O60840	R	1060	W	Pathogenic
172	CaV	CACNA1F	O60840	R	1296	C	Pathogenic
173	CaV	CACNA1F	O60840	R	1930	H	Polymorphism
174	CaV	CACNA1F	O60840	R	519	Q	Polymorphism
175	CaV	CACNA1F	O60840	R	523	H	Polymorphism
176	CaV	CACNA1F	O60840	R	70	Q	Polymorphism
177	CaV	CACNA1F	O60840	R	900	H	Unclassified
178	CaV	CACNA1F	O60840	R	937	C	Unclassified
179	CaV	CACNA1F	O60840	S	229	P	Pathogenic
180	CaV	CACNA1F	O60840	V	1072	L	Unclassified
181	CaV	CACNA1F	O60840	V	635	I	Unclassified
182	CaV	CACNA1F	O60840	W	91	L	Unclassified
183	CaV	CACNA1F	O60840	Y	1099	C	Unclassified
184	CaV	CACNA1G	O43497	A	1238	V	Unclassified
185	CaV	CACNA1G	O43497	A	961	T	Unclassified
186	CaV	CACNA1G	O43497	D	254	N	Unclassified
187	CaV	CACNA1G	O43497	E	2317	K	Pathogenic
188	CaV	CACNA1G	O43497	G	581	S	Unclassified
189	CaV	CACNA1G	O43497	I	2114	F	Unclassified
190	CaV	CACNA1G	O43497	K	1018	T	Unclassified
191	CaV	CACNA1G	O43497	L	1891	I	Unclassified
192	CaV	CACNA1G	O43497	L	208	P	Pathogenic
193	CaV	CACNA1G	O43497	M	1531	V	Pathogenic
194	CaV	CACNA1G	O43497	M	859	R	Unclassified
195	CaV	CACNA1G	O43497	M	88	V	Unclassified
196	CaV	CACNA1G	O43497	P	2237	H	Unclassified
197	CaV	CACNA1G	O43497	P	2356	S	Unclassified
198	CaV	CACNA1G	O43497	P	519	L	Unclassified
199	CaV	CACNA1G	O43497	P	591	S	Unclassified
200	CaV	CACNA1G	O43497	R	102	Q	Unclassified
201	CaV	CACNA1G	O43497	R	1185	C	Unclassified
202	CaV	CACNA1G	O43497	R	1715	H	Pathogenic
203	CaV	CACNA1G	O43497	R	2301	Q	Unclassified
204	CaV	CACNA1G	O43497	R	853	Q	Pathogenic
205	CaV	CACNA1G	O43497	S	1105	R	Unclassified
206	CaV	CACNA1G	O43497	S	26	W	Unclassified
207	CaV	CACNA1G	O43497	S	630	R	Pathogenic
208	CaV	CACNA1G	O43497	S	710	C	Unclassified
209	CaV	CACNA1G	O43497	T	2113	N	Unclassified
210	CaV	CACNA1G	O43497	T	867	P	Pathogenic
211	CaV	CACNA1G	O43497	V	954	M	Unclassified
212	CaV	CACNA1G	O43497	V	989	I	Unclassified
213	CaV	CACNA1G	O43497	Y	1593	C	Unclassified
214	CaV	CACNA1G	O43497	Y	1612	H	Unclassified
215	CaV	CACNA1H	O95180	A	1020	E	Unclassified
216	CaV	CACNA1H	O95180	A	1059	S	Polymorphism
217	CaV	CACNA1H	O95180	A	1208	T	Polymorphism
218	CaV	CACNA1H	O95180	A	1341	V	Unclassified
219	CaV	CACNA1H	O95180	A	1349	T	Polymorphism
220	CaV	CACNA1H	O95180	A	1358	T	Unclassified
221	CaV	CACNA1H	O95180	A	1382	V	Unclassified
222	CaV	CACNA1H	O95180	A	1439	V	Unclassified
223	CaV	CACNA1H	O95180	A	1476	T	Unclassified
224	CaV	CACNA1H	O95180	A	1705	T	Polymorphism
225	CaV	CACNA1H	O95180	A	1870	T	Unclassified
226	CaV	CACNA1H	O95180	A	1874	V	Unclassified
227	CaV	CACNA1H	O95180	A	1940	P	Unclassified
228	CaV	CACNA1H	O95180	A	1942	V	Unclassified
229	CaV	CACNA1H	O95180	A	1966	V	Polymorphism
230	CaV	CACNA1H	O95180	A	1997	T	Polymorphism
231	CaV	CACNA1H	O95180	A	2085	P	Unclassified
232	CaV	CACNA1H	O95180	A	2108	T	Polymorphism
233	CaV	CACNA1H	O95180	A	2198	V	Unclassified
234	CaV	CACNA1H	O95180	A	2208	V	Unclassified
235	CaV	CACNA1H	O95180	A	2209	P	Unclassified
236	CaV	CACNA1H	O95180	A	2240	T	Unclassified
237	CaV	CACNA1H	O95180	A	332	T	Polymorphism
238	CaV	CACNA1H	O95180	A	555	T	Unclassified
239	CaV	CACNA1H	O95180	A	555	V	Polymorphism
240	CaV	CACNA1H	O95180	A	598	V	Pathogenic
241	CaV	CACNA1H	O95180	A	599	T	Unclassified
242	CaV	CACNA1H	O95180	A	600	V	Unclassified
243	CaV	CACNA1H	O95180	A	690	V	Unclassified
244	CaV	CACNA1H	O95180	A	748	V	Pathogenic
245	CaV	CACNA1H	O95180	A	76	T	Unclassified
246	CaV	CACNA1H	O95180	A	846	V	Unclassified
247	CaV	CACNA1H	O95180	A	876	T	Polymorphism
248	CaV	CACNA1H	O95180	A	876	V	Unclassified
249	CaV	CACNA1H	O95180	C	128	G	Unclassified
250	CaV	CACNA1H	O95180	C	414	Y	Unclassified
251	CaV	CACNA1H	O95180	C	456	S	Pathogenic
252	CaV	CACNA1H	O95180	C	847	F	Unclassified
253	CaV	CACNA1H	O95180	C	847	S	Unclassified
254	CaV	CACNA1H	O95180	D	1023	N	Unclassified
255	CaV	CACNA1H	O95180	D	1028	N	Unclassified
256	CaV	CACNA1H	O95180	D	1102	N	Unclassified
257	CaV	CACNA1H	O95180	D	1200	A	Unclassified
258	CaV	CACNA1H	O95180	D	1216	N	Unclassified
259	CaV	CACNA1H	O95180	D	1218	N	Unclassified
260	CaV	CACNA1H	O95180	D	1233	V	Unclassified
261	CaV	CACNA1H	O95180	D	1248	N	Unclassified
262	CaV	CACNA1H	O95180	D	1463	N	Pathogenic
263	CaV	CACNA1H	O95180	D	1512	N	Unclassified
264	CaV	CACNA1H	O95180	D	1520	N	Unclassified
265	CaV	CACNA1H	O95180	D	2283	V	Polymorphism
266	CaV	CACNA1H	O95180	D	382	N	Unclassified
267	CaV	CACNA1H	O95180	D	568	N	Polymorphism
268	CaV	CACNA1H	O95180	D	579	N	Polymorphism
269	CaV	CACNA1H	O95180	E	10	K	Unclassified
270	CaV	CACNA1H	O95180	E	1047	K	Unclassified
271	CaV	CACNA1H	O95180	E	1170	K	Unclassified
272	CaV	CACNA1H	O95180	E	1197	K	Unclassified
273	CaV	CACNA1H	O95180	E	1460	K	Polymorphism
274	CaV	CACNA1H	O95180	E	1574	Q	Unclassified
275	CaV	CACNA1H	O95180	E	1820	K	Unclassified
276	CaV	CACNA1H	O95180	E	1879	K	Unclassified
277	CaV	CACNA1H	O95180	E	1974	G	Polymorphism
278	CaV	CACNA1H	O95180	E	2099	K	Unclassified
279	CaV	CACNA1H	O95180	E	2334	Q	Unclassified
280	CaV	CACNA1H	O95180	E	282	K	Polymorphism
281	CaV	CACNA1H	O95180	E	285	K	Unclassified
282	CaV	CACNA1H	O95180	E	542	K	Unclassified
283	CaV	CACNA1H	O95180	E	57	D	Unclassified
284	CaV	CACNA1H	O95180	E	718	A	Polymorphism
285	CaV	CACNA1H	O95180	E	718	G	Polymorphism
286	CaV	CACNA1H	O95180	E	819	K	Unclassified
287	CaV	CACNA1H	O95180	F	161	L	Polymorphism
288	CaV	CACNA1H	O95180	F	1802	L	Unclassified
289	CaV	CACNA1H	O95180	F	1840	C	Unclassified
290	CaV	CACNA1H	O95180	F	730	L	Unclassified
291	CaV	CACNA1H	O95180	G	1111	R	Polymorphism
292	CaV	CACNA1H	O95180	G	1111	R	Unclassified
293	CaV	CACNA1H	O95180	G	1187	R	Unclassified
294	CaV	CACNA1H	O95180	G	1219	R	Unclassified
295	CaV	CACNA1H	O95180	G	129	S	Polymorphism
296	CaV	CACNA1H	O95180	G	1355	S	Unclassified
297	CaV	CACNA1H	O95180	G	1415	D	Unclassified
298	CaV	CACNA1H	O95180	G	1992	S	Unclassified
299	CaV	CACNA1H	O95180	G	2087	V	Unclassified
300	CaV	CACNA1H	O95180	G	2088	R	Unclassified
301	CaV	CACNA1H	O95180	G	2128	D	Unclassified
302	CaV	CACNA1H	O95180	G	2163	A	Unclassified
303	CaV	CACNA1H	O95180	G	2202	D	Unclassified
304	CaV	CACNA1H	O95180	G	2241	R	Unclassified
305	CaV	CACNA1H	O95180	G	2242	R	Unclassified
306	CaV	CACNA1H	O95180	G	2315	S	Polymorphism
307	CaV	CACNA1H	O95180	G	245	S	Unclassified
308	CaV	CACNA1H	O95180	G	318	S	Unclassified
309	CaV	CACNA1H	O95180	G	47	A	Unclassified
310	CaV	CACNA1H	O95180	G	499	S	Pathogenic
311	CaV	CACNA1H	O95180	G	501	E	Polymorphism
312	CaV	CACNA1H	O95180	G	624	S	Unclassified
313	CaV	CACNA1H	O95180	G	631	R	Unclassified
314	CaV	CACNA1H	O95180	G	639	R	Unclassified
315	CaV	CACNA1H	O95180	G	647	S	Unclassified
316	CaV	CACNA1H	O95180	G	691	S	Unclassified
317	CaV	CACNA1H	O95180	G	716	C	Unclassified
318	CaV	CACNA1H	O95180	G	755	D	Unclassified
319	CaV	CACNA1H	O95180	G	773	D	Unclassified
320	CaV	CACNA1H	O95180	G	784	S	Pathogenic
321	CaV	CACNA1H	O95180	G	848	S	Unclassified
322	CaV	CACNA1H	O95180	G	948	R	Unclassified
323	CaV	CACNA1H	O95180	H	1357	L	Unclassified
324	CaV	CACNA1H	O95180	H	1477	R	Unclassified
325	CaV	CACNA1H	O95180	H	304	Q	Unclassified
326	CaV	CACNA1H	O95180	H	391	R	Unclassified
327	CaV	CACNA1H	O95180	H	516	Y	Unclassified
328	CaV	CACNA1H	O95180	H	646	P	Unclassified
329	CaV	CACNA1H	O95180	H	667	Q	Unclassified
330	CaV	CACNA1H	O95180	I	1311	V	Unclassified
331	CaV	CACNA1H	O95180	I	2300	V	Pathogenic
332	CaV	CACNA1H	O95180	I	799	V	Unclassified
333	CaV	CACNA1H	O95180	K	1918	E	Unclassified
334	CaV	CACNA1H	O95180	K	785	M	Polymorphism
335	CaV	CACNA1H	O95180	L	1058	P	Unclassified
336	CaV	CACNA1H	O95180	L	1094	M	Unclassified
337	CaV	CACNA1H	O95180	L	1619	F	Unclassified
338	CaV	CACNA1H	O95180	L	1995	F	Unclassified
339	CaV	CACNA1H	O95180	L	617	P	Unclassified
340	CaV	CACNA1H	O95180	L	888	M	Unclassified
341	CaV	CACNA1H	O95180	M	1055	V	Polymorphism
342	CaV	CACNA1H	O95180	M	1495	K	Unclassified
343	CaV	CACNA1H	O95180	M	1549	I	Pathogenic
344	CaV	CACNA1H	O95180	M	1549	T	Unclassified
345	CaV	CACNA1H	O95180	M	1549	V	Pathogenic
346	CaV	CACNA1H	O95180	M	155	L	Unclassified
347	CaV	CACNA1H	O95180	M	1636	V	Unclassified
348	CaV	CACNA1H	O95180	M	1694	T	Unclassified
349	CaV	CACNA1H	O95180	M	184	I	Unclassified
350	CaV	CACNA1H	O95180	M	2312	V	Polymorphism
351	CaV	CACNA1H	O95180	M	313	V	Polymorphism
352	CaV	CACNA1H	O95180	N	1793	S	Polymorphism
353	CaV	CACNA1H	O95180	N	270	T	Polymorphism
354	CaV	CACNA1H	O95180	P	1086	S	Unclassified
355	CaV	CACNA1H	O95180	P	1088	L	Unclassified
356	CaV	CACNA1H	O95180	P	1121	L	Polymorphism
357	CaV	CACNA1H	O95180	P	1121	R	Unclassified
358	CaV	CACNA1H	O95180	P	1201	T	Unclassified
359	CaV	CACNA1H	O95180	P	1210	L	Polymorphism
360	CaV	CACNA1H	O95180	P	1529	L	Unclassified
361	CaV	CACNA1H	O95180	P	1605	L	Unclassified
362	CaV	CACNA1H	O95180	P	1781	R	Unclassified
363	CaV	CACNA1H	O95180	P	1899	L	Unclassified
364	CaV	CACNA1H	O95180	P	1906	L	Unclassified
365	CaV	CACNA1H	O95180	P	1939	L	Unclassified
366	CaV	CACNA1H	O95180	P	1947	L	Polymorphism
367	CaV	CACNA1H	O95180	P	1982	L	Unclassified
368	CaV	CACNA1H	O95180	P	2083	L	Pathogenic
369	CaV	CACNA1H	O95180	P	2110	S	Unclassified
370	CaV	CACNA1H	O95180	P	2120	T	Unclassified
371	CaV	CACNA1H	O95180	P	2124	L	Polymorphism
372	CaV	CACNA1H	O95180	P	2147	L	Unclassified
373	CaV	CACNA1H	O95180	P	2173	S	Polymorphism
374	CaV	CACNA1H	O95180	P	2189	S	Unclassified
375	CaV	CACNA1H	O95180	P	2206	L	Unclassified
376	CaV	CACNA1H	O95180	P	2332	L	Unclassified
377	CaV	CACNA1H	O95180	P	277	L	Unclassified
378	CaV	CACNA1H	O95180	P	277	S	Unclassified
379	CaV	CACNA1H	O95180	P	50	L	Unclassified
380	CaV	CACNA1H	O95180	P	585	L	Polymorphism
381	CaV	CACNA1H	O95180	P	585	S	Unclassified
382	CaV	CACNA1H	O95180	P	618	L	Unclassified
383	CaV	CACNA1H	O95180	P	632	H	Unclassified
384	CaV	CACNA1H	O95180	P	640	L	Polymorphism
385	CaV	CACNA1H	O95180	P	648	L	Pathogenic
386	CaV	CACNA1H	O95180	P	656	S	Polymorphism
387	CaV	CACNA1H	O95180	P	673	S	Unclassified
388	CaV	CACNA1H	O95180	P	684	H	Pathogenic
389	CaV	CACNA1H	O95180	P	684	S	Polymorphism
390	CaV	CACNA1H	O95180	P	686	L	Polymorphism
391	CaV	CACNA1H	O95180	P	752	L	Unclassified
392	CaV	CACNA1H	O95180	Q	1220	E	Unclassified
393	CaV	CACNA1H	O95180	Q	1264	H	Polymorphism
394	CaV	CACNA1H	O95180	Q	163	H	Polymorphism
395	CaV	CACNA1H	O95180	Q	250	H	Unclassified
396	CaV	CACNA1H	O95180	Q	765	R	Polymorphism
397	CaV	CACNA1H	O95180	R	1069	Q	Polymorphism
398	CaV	CACNA1H	O95180	R	1142	H	Unclassified
399	CaV	CACNA1H	O95180	R	1150	H	Unclassified
400	CaV	CACNA1H	O95180	R	1157	C	Unclassified
401	CaV	CACNA1H	O95180	R	1157	H	Unclassified
402	CaV	CACNA1H	O95180	R	1194	Q	Unclassified
403	CaV	CACNA1H	O95180	R	1205	Q	Polymorphism
404	CaV	CACNA1H	O95180	R	1215	C	Unclassified
405	CaV	CACNA1H	O95180	R	1215	H	Unclassified
406	CaV	CACNA1H	O95180	R	1217	C	Unclassified
407	CaV	CACNA1H	O95180	R	1217	H	Unclassified
408	CaV	CACNA1H	O95180	R	1253	C	Unclassified
409	CaV	CACNA1H	O95180	R	1267	W	Unclassified
410	CaV	CACNA1H	O95180	R	1325	Q	Unclassified
411	CaV	CACNA1H	O95180	R	1412	W	Unclassified
412	CaV	CACNA1H	O95180	R	1474	W	Polymorphism
413	CaV	CACNA1H	O95180	R	1479	S	Unclassified
414	CaV	CACNA1H	O95180	R	1483	H	Unclassified
415	CaV	CACNA1H	O95180	R	1580	H	Unclassified
416	CaV	CACNA1H	O95180	R	1585	L	Unclassified
417	CaV	CACNA1H	O95180	R	1596	H	Unclassified
418	CaV	CACNA1H	O95180	R	1597	Q	Polymorphism
419	CaV	CACNA1H	O95180	R	1608	C	Unclassified
420	CaV	CACNA1H	O95180	R	1674	C	Unclassified
421	CaV	CACNA1H	O95180	R	1675	Q	Unclassified
422	CaV	CACNA1H	O95180	R	1721	H	Unclassified
423	CaV	CACNA1H	O95180	R	173	S	Unclassified
424	CaV	CACNA1H	O95180	R	1736	H	Unclassified
425	CaV	CACNA1H	O95180	R	1871	Q	Polymorphism
426	CaV	CACNA1H	O95180	R	1892	L	Polymorphism
427	CaV	CACNA1H	O95180	R	1893	Q	Unclassified
428	CaV	CACNA1H	O95180	R	1893	W	Unclassified
429	CaV	CACNA1H	O95180	R	1990	S	Unclassified
430	CaV	CACNA1H	O95180	R	2005	C	Polymorphism
431	CaV	CACNA1H	O95180	R	2005	H	Unclassified
432	CaV	CACNA1H	O95180	R	2011	Q	Unclassified
433	CaV	CACNA1H	O95180	R	2011	W	Unclassified
434	CaV	CACNA1H	O95180	R	2060	H	Polymorphism
435	CaV	CACNA1H	O95180	R	2070	C	Unclassified
436	CaV	CACNA1H	O95180	R	2077	H	Polymorphism
437	CaV	CACNA1H	O95180	R	2082	W	Unclassified
438	CaV	CACNA1H	O95180	R	2218	C	Unclassified
439	CaV	CACNA1H	O95180	R	2218	H	Polymorphism
440	CaV	CACNA1H	O95180	R	2250	H	Unclassified
441	CaV	CACNA1H	O95180	R	2250	S	Unclassified
442	CaV	CACNA1H	O95180	R	2257	W	Unclassified
443	CaV	CACNA1H	O95180	R	276	Q	Polymorphism
444	CaV	CACNA1H	O95180	R	309	H	Unclassified
445	CaV	CACNA1H	O95180	R	334	H	Unclassified
446	CaV	CACNA1H	O95180	R	469	C	Unclassified
447	CaV	CACNA1H	O95180	R	485	C	Unclassified
448	CaV	CACNA1H	O95180	R	503	H	Polymorphism
449	CaV	CACNA1H	O95180	R	505	C	Polymorphism
450	CaV	CACNA1H	O95180	R	506	Q	Unclassified
451	CaV	CACNA1H	O95180	R	537	H	Unclassified
452	CaV	CACNA1H	O95180	R	590	Q	Unclassified
453	CaV	CACNA1H	O95180	R	590	W	Unclassified
454	CaV	CACNA1H	O95180	R	705	C	Unclassified
455	CaV	CACNA1H	O95180	R	725	C	Unclassified
456	CaV	CACNA1H	O95180	R	739	C	Unclassified
457	CaV	CACNA1H	O95180	R	744	Q	Pathogenic
458	CaV	CACNA1H	O95180	R	747	C	Unclassified
459	CaV	CACNA1H	O95180	R	762	W	Unclassified
460	CaV	CACNA1H	O95180	R	777	C	Unclassified
461	CaV	CACNA1H	O95180	R	788	C	Polymorphism
462	CaV	CACNA1H	O95180	R	797	C	Unclassified
463	CaV	CACNA1H	O95180	R	854	Q	Unclassified
464	CaV	CACNA1H	O95180	R	884	C	Unclassified
465	CaV	CACNA1H	O95180	R	902	Q	Unclassified
466	CaV	CACNA1H	O95180	R	902	W	Unclassified
467	CaV	CACNA1H	O95180	R	903	H	Unclassified
468	CaV	CACNA1H	O95180	S	1147	G	Polymorphism
469	CaV	CACNA1H	O95180	S	1174	G	Unclassified
470	CaV	CACNA1H	O95180	S	1234	R	Unclassified
471	CaV	CACNA1H	O95180	S	1246	L	Unclassified
472	CaV	CACNA1H	O95180	S	1246	W	Unclassified
473	CaV	CACNA1H	O95180	S	1612	L	Unclassified
474	CaV	CACNA1H	O95180	S	1644	L	Unclassified
475	CaV	CACNA1H	O95180	S	1890	R	Unclassified
476	CaV	CACNA1H	O95180	S	1922	F	Unclassified
477	CaV	CACNA1H	O95180	S	196	L	Pathogenic
478	CaV	CACNA1H	O95180	S	1970	C	Unclassified
479	CaV	CACNA1H	O95180	S	1975	F	Polymorphism
480	CaV	CACNA1H	O95180	S	1991	R	Unclassified
481	CaV	CACNA1H	O95180	S	2008	I	Unclassified
482	CaV	CACNA1H	O95180	S	2066	T	Unclassified
483	CaV	CACNA1H	O95180	S	2094	W	Unclassified
484	CaV	CACNA1H	O95180	S	2157	L	Unclassified
485	CaV	CACNA1H	O95180	S	2162	I	Unclassified
486	CaV	CACNA1H	O95180	S	2238	L	Unclassified
487	CaV	CACNA1H	O95180	S	2295	F	Unclassified
488	CaV	CACNA1H	O95180	S	264	G	Unclassified
489	CaV	CACNA1H	O95180	S	303	L	Unclassified
490	CaV	CACNA1H	O95180	S	677	L	Polymorphism
491	CaV	CACNA1H	O95180	S	680	N	Unclassified
492	CaV	CACNA1H	O95180	S	796	N	Unclassified
493	CaV	CACNA1H	O95180	T	1034	M	Unclassified
494	CaV	CACNA1H	O95180	T	1083	M	Pathogenic
495	CaV	CACNA1H	O95180	T	1087	I	Unclassified
496	CaV	CACNA1H	O95180	T	1588	A	Unclassified
497	CaV	CACNA1H	O95180	T	1606	M	Polymorphism
498	CaV	CACNA1H	O95180	T	2114	I	Unclassified
499	CaV	CACNA1H	O95180	T	273	S	Polymorphism
500	CaV	CACNA1H	O95180	T	610	A	Polymorphism
501	CaV	CACNA1H	O95180	T	615	M	Unclassified
502	CaV	CACNA1H	O95180	T	822	I	Unclassified
503	CaV	CACNA1H	O95180	T	833	A	Unclassified
504	CaV	CACNA1H	O95180	T	920	M	Polymorphism
505	CaV	CACNA1H	O95180	V	105	M	Unclassified
506	CaV	CACNA1H	O95180	V	1285	I	Unclassified
507	CaV	CACNA1H	O95180	V	1309	I	Unclassified
508	CaV	CACNA1H	O95180	V	1374	M	Unclassified
509	CaV	CACNA1H	O95180	V	1519	I	Polymorphism
510	CaV	CACNA1H	O95180	V	1542	I	Unclassified
511	CaV	CACNA1H	O95180	V	1551	M	Unclassified
512	CaV	CACNA1H	O95180	V	1629	A	Unclassified
513	CaV	CACNA1H	O95180	V	1838	I	Unclassified
514	CaV	CACNA1H	O95180	V	1841	M	Unclassified
515	CaV	CACNA1H	O95180	V	1937	M	Unclassified
516	CaV	CACNA1H	O95180	V	1951	E	Unclassified
517	CaV	CACNA1H	O95180	V	2067	I	Unclassified
518	CaV	CACNA1H	O95180	V	2079	I	Unclassified
519	CaV	CACNA1H	O95180	V	233	L	Pathogenic
520	CaV	CACNA1H	O95180	V	2353	M	Polymorphism
521	CaV	CACNA1H	O95180	V	464	M	Unclassified
522	CaV	CACNA1H	O95180	V	664	A	Polymorphism
523	CaV	CACNA1H	O95180	V	734	I	Unclassified
524	CaV	CACNA1H	O95180	V	780	F	Polymorphism
525	CaV	CACNA1H	O95180	V	790	M	Polymorphism
526	CaV	CACNA1H	O95180	V	812	M	Polymorphism
527	CaV	CACNA1H	O95180	V	831	M	Polymorphism
528	CaV	CACNA1H	O95180	W	2154	R	Polymorphism
529	CaV	CACNA1H	O95180	W	2171	R	Unclassified
530	CaV	CACNA1H	O95180	Y	1618	S	Unclassified
531	CaV	CACNA1H	O95180	Y	479	C	Unclassified
532	CaV	CACNA1H	O95180	Y	728	C	Unclassified
533	CaV	CACNA1I	Q9P0X4	G	1782	A	Polymorphism
534	CaV	CACNA1I	Q9P0X4	G	1782	R	Polymorphism
535	CaV	CACNA1I	Q9P0X4	I	1040	V	Polymorphism
536	CaV	CACNA1I	Q9P0X4	I	1306	T	Unclassified
537	CaV	CACNA1I	Q9P0X4	T	1513	M	Polymorphism
538	CaV	CACNA1S	Q13698	A	1271	T	Polymorphism
539	CaV	CACNA1S	Q13698	A	1282	S	Unclassified
540	CaV	CACNA1S	Q13698	A	1324	T	Unclassified
541	CaV	CACNA1S	Q13698	A	1666	T	Polymorphism
542	CaV	CACNA1S	Q13698	A	200	T	Unclassified
543	CaV	CACNA1S	Q13698	A	450	T	Unclassified
544	CaV	CACNA1S	Q13698	A	560	S	Pathogenic
545	CaV	CACNA1S	Q13698	A	560	T	Unclassified
546	CaV	CACNA1S	Q13698	A	63	S	Unclassified
547	CaV	CACNA1S	Q13698	A	67	V	Unclassified
548	CaV	CACNA1S	Q13698	A	69	G	Polymorphism
549	CaV	CACNA1S	Q13698	A	702	S	Unclassified
550	CaV	CACNA1S	Q13698	A	776	D	Unclassified
551	CaV	CACNA1S	Q13698	A	814	T	Polymorphism
552	CaV	CACNA1S	Q13698	C	501	F	Unclassified
553	CaV	CACNA1S	Q13698	C	638	S	Unclassified
554	CaV	CACNA1S	Q13698	D	1382	G	Unclassified
555	CaV	CACNA1S	Q13698	D	1516	H	Unclassified
556	CaV	CACNA1S	Q13698	D	1859	G	Unclassified
557	CaV	CACNA1S	Q13698	D	389	V	Unclassified
558	CaV	CACNA1S	Q13698	D	836	G	Unclassified
559	CaV	CACNA1S	Q13698	D	998	E	Unclassified
560	CaV	CACNA1S	Q13698	D	998	N	Unclassified
561	CaV	CACNA1S	Q13698	E	1488	K	Polymorphism
562	CaV	CACNA1S	Q13698	E	1564	K	Unclassified
563	CaV	CACNA1S	Q13698	E	1583	K	Unclassified
564	CaV	CACNA1S	Q13698	E	1639	K	Unclassified
565	CaV	CACNA1S	Q13698	E	1639	V	Unclassified
566	CaV	CACNA1S	Q13698	E	1821	G	Unclassified
567	CaV	CACNA1S	Q13698	E	1837	A	Polymorphism
568	CaV	CACNA1S	Q13698	E	1840	D	Polymorphism
569	CaV	CACNA1S	Q13698	E	666	K	Unclassified
570	CaV	CACNA1S	Q13698	F	135	S	Unclassified
571	CaV	CACNA1S	Q13698	F	1806	S	Unclassified
572	CaV	CACNA1S	Q13698	F	434	S	Unclassified
573	CaV	CACNA1S	Q13698	G	1062	D	Unclassified
574	CaV	CACNA1S	Q13698	G	1136	S	Unclassified
575	CaV	CACNA1S	Q13698	G	1210	R	Unclassified
576	CaV	CACNA1S	Q13698	G	1252	R	Unclassified
577	CaV	CACNA1S	Q13698	G	1297	E	Polymorphism
578	CaV	CACNA1S	Q13698	G	1415	R	Unclassified
579	CaV	CACNA1S	Q13698	G	1852	R	Polymorphism
580	CaV	CACNA1S	Q13698	G	230	S	Unclassified
581	CaV	CACNA1S	Q13698	G	258	D	Polymorphism
582	CaV	CACNA1S	Q13698	G	258	S	Unclassified
583	CaV	CACNA1S	Q13698	G	258	V	Unclassified
584	CaV	CACNA1S	Q13698	G	582	A	Unclassified
585	CaV	CACNA1S	Q13698	G	628	S	Unclassified
586	CaV	CACNA1S	Q13698	G	629	R	Polymorphism
587	CaV	CACNA1S	Q13698	G	85	S	Unclassified
588	CaV	CACNA1S	Q13698	G	861	A	Unclassified
589	CaV	CACNA1S	Q13698	H	1139	P	Unclassified
590	CaV	CACNA1S	Q13698	H	1148	Y	Unclassified
591	CaV	CACNA1S	Q13698	H	916	Q	Pathogenic
592	CaV	CACNA1S	Q13698	H	987	R	Polymorphism
593	CaV	CACNA1S	Q13698	I	1133	T	Unclassified
594	CaV	CACNA1S	Q13698	I	1195	T	Unclassified
595	CaV	CACNA1S	Q13698	I	1497	T	Unclassified
596	CaV	CACNA1S	Q13698	I	289	V	Unclassified
597	CaV	CACNA1S	Q13698	I	605	V	Polymorphism
598	CaV	CACNA1S	Q13698	K	1437	Q	Unclassified
599	CaV	CACNA1S	Q13698	K	88	E	Unclassified
600	CaV	CACNA1S	Q13698	L	132	M	Polymorphism
601	CaV	CACNA1S	Q13698	L	1604	M	Unclassified
602	CaV	CACNA1S	Q13698	L	1628	F	Unclassified
603	CaV	CACNA1S	Q13698	L	164	F	Unclassified
604	CaV	CACNA1S	Q13698	L	1800	S	Polymorphism
605	CaV	CACNA1S	Q13698	L	31	F	Unclassified
606	CaV	CACNA1S	Q13698	L	328	M	Unclassified
607	CaV	CACNA1S	Q13698	L	398	Q	Unclassified
608	CaV	CACNA1S	Q13698	L	458	H	Polymorphism
609	CaV	CACNA1S	Q13698	L	807	F	Unclassified
610	CaV	CACNA1S	Q13698	M	1005	L	Unclassified
611	CaV	CACNA1S	Q13698	M	1146	K	Unclassified
612	CaV	CACNA1S	Q13698	M	1241	T	Unclassified
613	CaV	CACNA1S	Q13698	M	152	V	Unclassified
614	CaV	CACNA1S	Q13698	M	1593	T	Unclassified
615	CaV	CACNA1S	Q13698	M	1750	V	Unclassified
616	CaV	CACNA1S	Q13698	M	519	I	Unclassified
617	CaV	CACNA1S	Q13698	M	635	K	Unclassified
618	CaV	CACNA1S	Q13698	M	635	V	Polymorphism
619	CaV	CACNA1S	Q13698	M	701	I	Unclassified
620	CaV	CACNA1S	Q13698	M	827	T	Polymorphism
621	CaV	CACNA1S	Q13698	N	1037	K	Unclassified
622	CaV	CACNA1S	Q13698	N	1221	I	Unclassified
623	CaV	CACNA1S	Q13698	N	1654	K	Unclassified
624	CaV	CACNA1S	Q13698	N	1662	Y	Unclassified
625	CaV	CACNA1S	Q13698	N	1674	H	Unclassified
626	CaV	CACNA1S	Q13698	N	1850	K	Unclassified
627	CaV	CACNA1S	Q13698	N	649	H	Unclassified
628	CaV	CACNA1S	Q13698	N	803	D	Unclassified
629	CaV	CACNA1S	Q13698	P	1268	S	Unclassified
630	CaV	CACNA1S	Q13698	P	1767	T	Polymorphism
631	CaV	CACNA1S	Q13698	P	1839	S	Polymorphism
632	CaV	CACNA1S	Q13698	P	1871	L	Unclassified
633	CaV	CACNA1S	Q13698	P	457	L	Unclassified
634	CaV	CACNA1S	Q13698	P	457	S	Unclassified
635	CaV	CACNA1S	Q13698	Q	1108	E	Unclassified
636	CaV	CACNA1S	Q13698	Q	1142	P	Polymorphism
637	CaV	CACNA1S	Q13698	Q	1508	E	Unclassified
638	CaV	CACNA1S	Q13698	R	1086	C	Unclassified
639	CaV	CACNA1S	Q13698	R	1086	H	Polymorphism
640	CaV	CACNA1S	Q13698	R	1086	S	Unclassified
641	CaV	CACNA1S	Q13698	R	1096	H	Unclassified
642	CaV	CACNA1S	Q13698	R	119	P	Unclassified
643	CaV	CACNA1S	Q13698	R	1229	P	Unclassified
644	CaV	CACNA1S	Q13698	R	1239	G	Pathogenic
645	CaV	CACNA1S	Q13698	R	1239	H	Pathogenic
646	CaV	CACNA1S	Q13698	R	1254	G	Unclassified
647	CaV	CACNA1S	Q13698	R	1254	Q	Polymorphism
648	CaV	CACNA1S	Q13698	R	1302	W	Unclassified
649	CaV	CACNA1S	Q13698	R	1447	Q	Unclassified
650	CaV	CACNA1S	Q13698	R	1539	C	Polymorphism
651	CaV	CACNA1S	Q13698	R	1599	W	Unclassified
652	CaV	CACNA1S	Q13698	R	1652	C	Polymorphism
653	CaV	CACNA1S	Q13698	R	1658	H	Polymorphism
654	CaV	CACNA1S	Q13698	R	168	Q	Unclassified
655	CaV	CACNA1S	Q13698	R	1702	Q	Unclassified
656	CaV	CACNA1S	Q13698	R	174	W	Unclassified
657	CaV	CACNA1S	Q13698	R	1770	K	Unclassified
658	CaV	CACNA1S	Q13698	R	354	W	Unclassified
659	CaV	CACNA1S	Q13698	R	364	Q	Unclassified
660	CaV	CACNA1S	Q13698	R	419	H	Unclassified
661	CaV	CACNA1S	Q13698	R	462	H	Unclassified
662	CaV	CACNA1S	Q13698	R	489	C	Unclassified
663	CaV	CACNA1S	Q13698	R	498	C	Unclassified
664	CaV	CACNA1S	Q13698	R	498	H	Unclassified
665	CaV	CACNA1S	Q13698	R	498	L	Unclassified
666	CaV	CACNA1S	Q13698	R	528	G	Pathogenic
667	CaV	CACNA1S	Q13698	R	528	H	Pathogenic
668	CaV	CACNA1S	Q13698	R	528	L	Unclassified
669	CaV	CACNA1S	Q13698	R	557	H	Polymorphism
670	CaV	CACNA1S	Q13698	R	593	W	Unclassified
671	CaV	CACNA1S	Q13698	R	594	C	Polymorphism
672	CaV	CACNA1S	Q13698	R	594	H	Unclassified
673	CaV	CACNA1S	Q13698	R	683	C	Polymorphism
674	CaV	CACNA1S	Q13698	R	683	H	Unclassified
675	CaV	CACNA1S	Q13698	R	789	C	Unclassified
676	CaV	CACNA1S	Q13698	R	794	H	Unclassified
677	CaV	CACNA1S	Q13698	R	823	W	Unclassified
678	CaV	CACNA1S	Q13698	R	865	H	Polymorphism
679	CaV	CACNA1S	Q13698	R	897	K	Unclassified
680	CaV	CACNA1S	Q13698	R	897	S	Unclassified
681	CaV	CACNA1S	Q13698	R	900	S	Pathogenic
682	CaV	CACNA1S	Q13698	R	910	K	Unclassified
683	CaV	CACNA1S	Q13698	R	986	H	Polymorphism
684	CaV	CACNA1S	Q13698	S	1333	N	Unclassified
685	CaV	CACNA1S	Q13698	S	154	G	Polymorphism
686	CaV	CACNA1S	Q13698	S	1756	N	Unclassified
687	CaV	CACNA1S	Q13698	S	177	L	Unclassified
688	CaV	CACNA1S	Q13698	S	1857	N	Polymorphism
689	CaV	CACNA1S	Q13698	S	451	L	Unclassified
690	CaV	CACNA1S	Q13698	S	516	L	Polymorphism
691	CaV	CACNA1S	Q13698	S	606	N	Polymorphism
692	CaV	CACNA1S	Q13698	S	618	A	Unclassified
693	CaV	CACNA1S	Q13698	S	826	T	Unclassified
694	CaV	CACNA1S	Q13698	S	993	R	Unclassified
695	CaV	CACNA1S	Q13698	T	1009	M	Unclassified
696	CaV	CACNA1S	Q13698	T	128	S	Polymorphism
697	CaV	CACNA1S	Q13698	T	1351	A	Unclassified
698	CaV	CACNA1S	Q13698	T	1354	I	Unclassified
699	CaV	CACNA1S	Q13698	T	1354	S	Unclassified
700	CaV	CACNA1S	Q13698	T	1573	M	Polymorphism
701	CaV	CACNA1S	Q13698	T	1696	M	Polymorphism
702	CaV	CACNA1S	Q13698	T	1772	S	Unclassified
703	CaV	CACNA1S	Q13698	T	1830	R	Unclassified
704	CaV	CACNA1S	Q13698	T	236	K	Unclassified
705	CaV	CACNA1S	Q13698	T	248	M	Unclassified
706	CaV	CACNA1S	Q13698	T	316	S	Unclassified
707	CaV	CACNA1S	Q13698	T	461	N	Unclassified
708	CaV	CACNA1S	Q13698	T	520	P	Unclassified
709	CaV	CACNA1S	Q13698	T	543	M	Unclassified
710	CaV	CACNA1S	Q13698	T	700	M	Unclassified
711	CaV	CACNA1S	Q13698	V	1031	M	Unclassified
712	CaV	CACNA1S	Q13698	V	1064	I	Unclassified
713	CaV	CACNA1S	Q13698	V	1111	M	Polymorphism
714	CaV	CACNA1S	Q13698	V	1222	I	Polymorphism
715	CaV	CACNA1S	Q13698	V	1449	G	Unclassified
716	CaV	CACNA1S	Q13698	V	161	A	Unclassified
717	CaV	CACNA1S	Q13698	V	161	I	Unclassified
718	CaV	CACNA1S	Q13698	V	1621	A	Unclassified
719	CaV	CACNA1S	Q13698	V	1621	I	Unclassified
720	CaV	CACNA1S	Q13698	V	176	L	Unclassified
721	CaV	CACNA1S	Q13698	V	207	I	Unclassified
722	CaV	CACNA1S	Q13698	V	297	I	Unclassified
723	CaV	CACNA1S	Q13698	V	470	L	Unclassified
724	CaV	CACNA1S	Q13698	V	571	I	Polymorphism
725	CaV	CACNA1S	Q13698	V	66	M	Unclassified
726	CaV	CACNA1S	Q13698	V	661	M	Unclassified
727	CaV	CACNA1S	Q13698	V	70	M	Unclassified
728	CaV	CACNA1S	Q13698	V	876	E	Pathogenic
729	CaV	CACNA1S	Q13698	V	898	M	Unclassified
730	CaV	CACNA1S	Q13698	V	918	A	Unclassified
731	CaV	CACNA1S	Q13698	V	923	L	Unclassified
732	CaV	CACNA1S	Q13698	V	923	M	Unclassified
733	CaV	CACNA1S	Q13698	V	974	E	Unclassified
734	CaV	CACNA1S	Q13698	V	974	M	Unclassified
735	CaV	CACNA1S	Q13698	W	300	R	Unclassified
736	CaV	CACNA1S	Q13698	Y	1113	H	Unclassified
737	CaV	CACNA1S	Q13698	Y	1140	C	Unclassified
738	CaV	CACNA1S	Q13698	Y	1177	F	Unclassified
739	CaV	CACNA1S	Q13698	Y	1670	N	Unclassified
740	CaV	CACNA1S	Q13698	Y	299	H	Polymorphism
741	CaV	CACNA1S	Q13698	Y	854	S	Unclassified
742	KV	KCNA1	Q09470	A	166	P	Unclassified
743	KV	KCNA1	Q09470	A	242	P	Pathogenic
744	KV	KCNA1	Q09470	A	352	P	Unclassified
745	KV	KCNA1	Q09470	A	395	S	Pathogenic
746	KV	KCNA1	Q09470	A	401	V	Pathogenic
747	KV	KCNA1	Q09470	E	124	K	Unclassified
748	KV	KCNA1	Q09470	E	187	K	Unclassified
749	KV	KCNA1	Q09470	E	325	D	Pathogenic
750	KV	KCNA1	Q09470	F	184	C	Pathogenic
751	KV	KCNA1	Q09470	F	249	I	Pathogenic
752	KV	KCNA1	Q09470	F	414	C	Pathogenic
753	KV	KCNA1	Q09470	G	200	A	Unclassified
754	KV	KCNA1	Q09470	G	376	R	Unclassified
755	KV	KCNA1	Q09470	H	18	P	Unclassified
756	KV	KCNA1	Q09470	I	177	N	Pathogenic
757	KV	KCNA1	Q09470	I	177	R	Pathogenic
758	KV	KCNA1	Q09470	I	314	T	Pathogenic
759	KV	KCNA1	Q09470	I	400	V	Unclassified
760	KV	KCNA1	Q09470	K	138	Q	Unclassified
761	KV	KCNA1	Q09470	L	291	H	Unclassified
762	KV	KCNA1	Q09470	L	305	F	Pathogenic
763	KV	KCNA1	Q09470	L	329	I	Pathogenic
764	KV	KCNA1	Q09470	M	4	I	Unclassified
765	KV	KCNA1	Q09470	M	449	T	Unclassified
766	KV	KCNA1	Q09470	M	455	K	Unclassified
767	KV	KCNA1	Q09470	N	255	D	Pathogenic
768	KV	KCNA1	Q09470	P	244	H	Pathogenic
769	KV	KCNA1	Q09470	P	405	L	Pathogenic
770	KV	KCNA1	Q09470	P	75	H	Unclassified
771	KV	KCNA1	Q09470	Q	20	H	Unclassified
772	KV	KCNA1	Q09470	Q	483	H	Unclassified
773	KV	KCNA1	Q09470	R	204	H	Unclassified
774	KV	KCNA1	Q09470	R	239	S	Pathogenic
775	KV	KCNA1	Q09470	R	26	W	Unclassified
776	KV	KCNA1	Q09470	R	295	H	Unclassified
777	KV	KCNA1	Q09470	R	443	G	Unclassified
778	KV	KCNA1	Q09470	S	322	R	Unclassified
779	KV	KCNA1	Q09470	S	342	I	Pathogenic
780	KV	KCNA1	Q09470	S	489	N	Unclassified
781	KV	KCNA1	Q09470	T	226	A	Pathogenic
782	KV	KCNA1	Q09470	T	226	K	Pathogenic
783	KV	KCNA1	Q09470	T	226	M	Pathogenic
784	KV	KCNA1	Q09470	T	226	R	Pathogenic
785	KV	KCNA1	Q09470	V	106	A	Unclassified
786	KV	KCNA1	Q09470	V	174	F	Pathogenic
787	KV	KCNA1	Q09470	V	404	I	Pathogenic
788	KV	KCNA1	Q09470	V	408	A	Pathogenic
789	KV	KCNA1	Q09470	V	408	L	Pathogenic
790	KV	KCNA1	Q09470	V	408	M	Unclassified
791	KV	KCNA1	Q09470	Y	159	H	Unclassified
792	KV	KCNA10	Q16322	R	200	H	Unclassified
793	KV	KCNA10	Q16322	S	258	N	Polymorphism
794	KV	KCNA10	Q16322	V	220	M	Polymorphism
795	KV	KCNA2	P16389	A	281	T	Unclassified
796	KV	KCNA2	P16389	C	435	S	Unclassified
797	KV	KCNA2	P16389	E	183	K	Unclassified
798	KV	KCNA2	P16389	F	333	L	Unclassified
799	KV	KCNA2	P16389	G	211	R	Unclassified
800	KV	KCNA2	P16389	G	284	D	Unclassified
801	KV	KCNA2	P16389	G	338	E	Pathogenic
802	KV	KCNA2	P16389	G	376	A	Unclassified
803	KV	KCNA2	P16389	I	263	T	Pathogenic
804	KV	KCNA2	P16389	I	385	T	Unclassified
805	KV	KCNA2	P16389	L	290	P	Pathogenic
806	KV	KCNA2	P16389	L	298	F	Pathogenic
807	KV	KCNA2	P16389	L	321	F	Unclassified
808	KV	KCNA2	P16389	L	330	R	Pathogenic
809	KV	KCNA2	P16389	P	362	A	Pathogenic
810	KV	KCNA2	P16389	P	382	L	Unclassified
811	KV	KCNA2	P16389	P	405	L	Pathogenic
812	KV	KCNA2	P16389	R	189	W	Unclassified
813	KV	KCNA2	P16389	R	294	H	Unclassified
814	KV	KCNA2	P16389	R	297	Q	Pathogenic
815	KV	KCNA2	P16389	R	419	Q	Unclassified
816	KV	KCNA2	P16389	R	73	Q	Unclassified
817	KV	KCNA2	P16389	R	80	W	Unclassified
818	KV	KCNA2	P16389	R	82	C	Unclassified
819	KV	KCNA2	P16389	S	324	T	Pathogenic
820	KV	KCNA2	P16389	S	343	F	Unclassified
821	KV	KCNA2	P16389	T	320	I	Pathogenic
822	KV	KCNA2	P16389	T	373	I	Pathogenic
823	KV	KCNA2	P16389	T	374	A	Pathogenic
824	KV	KCNA2	P16389	T	401	I	Pathogenic
825	KV	KCNA2	P16389	V	299	L	Unclassified
826	KV	KCNA2	P16389	V	399	M	Pathogenic
827	KV	KCNA2	P16389	V	406	F	Unclassified
828	KV	KCNA2	P16389	W	232	R	Unclassified
829	KV	KCNA2	P16389	Y	23	C	Pathogenic
830	KV	KCNA3	P22001	K	134	R	Unclassified
831	KV	KCNA5	P22460	A	251	T	Polymorphism
832	KV	KCNA5	P22460	A	293	T	Unclassified
833	KV	KCNA5	P22460	A	305	T	Unclassified
834	KV	KCNA5	P22460	A	321	T	Polymorphism
835	KV	KCNA5	P22460	A	576	V	Pathogenic
836	KV	KCNA5	P22460	C	36	S	Unclassified
837	KV	KCNA5	P22460	D	166	A	Unclassified
838	KV	KCNA5	P22460	D	322	E	Unclassified
839	KV	KCNA5	P22460	D	322	H	Unclassified
840	KV	KCNA5	P22460	E	211	D	Unclassified
841	KV	KCNA5	P22460	E	223	K	Unclassified
842	KV	KCNA5	P22460	E	33	V	Unclassified
843	KV	KCNA5	P22460	E	48	G	Pathogenic
844	KV	KCNA5	P22460	E	610	K	Pathogenic
845	KV	KCNA5	P22460	E	84	A	Unclassified
846	KV	KCNA5	P22460	F	522	S	Unclassified
847	KV	KCNA5	P22460	G	128	R	Unclassified
848	KV	KCNA5	P22460	G	182	R	Unclassified
849	KV	KCNA5	P22460	G	27	S	Unclassified
850	KV	KCNA5	P22460	G	300	C	Unclassified
851	KV	KCNA5	P22460	G	300	S	Unclassified
852	KV	KCNA5	P22460	G	31	V	Polymorphism
853	KV	KCNA5	P22460	G	384	R	Unclassified
854	KV	KCNA5	P22460	G	558	R	Polymorphism
855	KV	KCNA5	P22460	G	561	R	Unclassified
856	KV	KCNA5	P22460	G	568	V	Unclassified
857	KV	KCNA5	P22460	G	74	E	Polymorphism
858	KV	KCNA5	P22460	I	252	V	Unclassified
859	KV	KCNA5	P22460	I	443	V	Unclassified
860	KV	KCNA5	P22460	I	467	T	Unclassified
861	KV	KCNA5	P22460	K	349	E	Unclassified
862	KV	KCNA5	P22460	K	47	R	Unclassified
863	KV	KCNA5	P22460	L	42	H	Unclassified
864	KV	KCNA5	P22460	L	85	M	Polymorphism
865	KV	KCNA5	P22460	M	304	T	Unclassified
866	KV	KCNA5	P22460	P	170	R	Unclassified
867	KV	KCNA5	P22460	P	228	S	Polymorphism
868	KV	KCNA5	P22460	P	307	S	Unclassified
869	KV	KCNA5	P22460	P	310	L	Polymorphism
870	KV	KCNA5	P22460	P	323	S	Unclassified
871	KV	KCNA5	P22460	P	347	S	Unclassified
872	KV	KCNA5	P22460	P	532	L	Polymorphism
873	KV	KCNA5	P22460	P	77	S	Polymorphism
874	KV	KCNA5	P22460	R	154	S	Unclassified
875	KV	KCNA5	P22460	R	184	H	Unclassified
876	KV	KCNA5	P22460	R	184	P	Unclassified
877	KV	KCNA5	P22460	R	212	C	Unclassified
878	KV	KCNA5	P22460	R	234	L	Unclassified
879	KV	KCNA5	P22460	R	283	C	Unclassified
880	KV	KCNA5	P22460	R	283	H	Unclassified
881	KV	KCNA5	P22460	R	577	Q	Unclassified
882	KV	KCNA5	P22460	R	578	K	Polymorphism
883	KV	KCNA5	P22460	R	597	Q	Unclassified
884	KV	KCNA5	P22460	R	609	P	Unclassified
885	KV	KCNA5	P22460	R	87	Q	Unclassified
886	KV	KCNA5	P22460	T	114	P	Unclassified
887	KV	KCNA5	P22460	T	266	I	Unclassified
888	KV	KCNA5	P22460	T	527	M	Unclassified
889	KV	KCNA5	P22460	T	611	K	Unclassified
890	KV	KCNA5	P22460	V	259	F	Unclassified
891	KV	KCNA5	P22460	V	452	I	Unclassified
892	KV	KCNA5	P22460	V	452	L	Unclassified
893	KV	KCNA5	P22460	Y	155	C	Unclassified
894	KV	KCNA7	Q96RP8	M	418	T	Polymorphism
895	KV	KCNA7	Q96RP8	P	189	R	Polymorphism
896	KV	KCNB1	Q14721	A	702	E	Unclassified
897	KV	KCNB1	Q14721	A	706	T	Unclassified
898	KV	KCNB1	Q14721	A	758	T	Unclassified
899	KV	KCNB1	Q14721	C	397	Y	Pathogenic
900	KV	KCNB1	Q14721	D	382	H	Pathogenic
901	KV	KCNB1	Q14721	D	771	V	Unclassified
902	KV	KCNB1	Q14721	E	157	D	Unclassified
903	KV	KCNB1	Q14721	E	330	D	Pathogenic
904	KV	KCNB1	Q14721	E	330	K	Pathogenic
905	KV	KCNB1	Q14721	E	353	K	Pathogenic
906	KV	KCNB1	Q14721	E	422	A	Pathogenic
907	KV	KCNB1	Q14721	E	798	Q	Unclassified
908	KV	KCNB1	Q14721	G	332	V	Pathogenic
909	KV	KCNB1	Q14721	G	379	R	Pathogenic
910	KV	KCNB1	Q14721	G	38	A	Unclassified
911	KV	KCNB1	Q14721	G	381	E	Pathogenic
912	KV	KCNB1	Q14721	G	395	R	Pathogenic
913	KV	KCNB1	Q14721	G	401	R	Pathogenic
914	KV	KCNB1	Q14721	H	313	R	Pathogenic
915	KV	KCNB1	Q14721	H	313	Y	Pathogenic
916	KV	KCNB1	Q14721	H	42	Q	Unclassified
917	KV	KCNB1	Q14721	I	193	K	Unclassified
918	KV	KCNB1	Q14721	I	463	T	Unclassified
919	KV	KCNB1	Q14721	I	565	V	Polymorphism
920	KV	KCNB1	Q14721	I	814	M	Polymorphism
921	KV	KCNB1	Q14721	K	7	E	Unclassified
922	KV	KCNB1	Q14721	K	776	R	Unclassified
923	KV	KCNB1	Q14721	L	271	P	Unclassified
924	KV	KCNB1	Q14721	L	334	P	Pathogenic
925	KV	KCNB1	Q14721	N	697	K	Unclassified
926	KV	KCNB1	Q14721	P	385	T	Pathogenic
927	KV	KCNB1	Q14721	P	613	S	Polymorphism
928	KV	KCNB1	Q14721	P	666	L	Unclassified
929	KV	KCNB1	Q14721	P	734	S	Unclassified
930	KV	KCNB1	Q14721	P	735	A	Unclassified
931	KV	KCNB1	Q14721	P	774	T	Unclassified
932	KV	KCNB1	Q14721	P	775	H	Unclassified
933	KV	KCNB1	Q14721	P	775	R	Unclassified
934	KV	KCNB1	Q14721	P	784	L	Unclassified
935	KV	KCNB1	Q14721	P	825	S	Polymorphism
936	KV	KCNB1	Q14721	P	839	L	Polymorphism
937	KV	KCNB1	Q14721	R	303	Q	Unclassified
938	KV	KCNB1	Q14721	R	306	C	Pathogenic
939	KV	KCNB1	Q14721	R	312	C	Pathogenic
940	KV	KCNB1	Q14721	R	312	H	Pathogenic
941	KV	KCNB1	Q14721	R	456	Q	Unclassified
942	KV	KCNB1	Q14721	R	575	C	Unclassified
943	KV	KCNB1	Q14721	R	627	Q	Unclassified
944	KV	KCNB1	Q14721	R	670	Q	Unclassified
945	KV	KCNB1	Q14721	S	202	F	Unclassified
946	KV	KCNB1	Q14721	S	347	R	Pathogenic
947	KV	KCNB1	Q14721	S	633	N	Unclassified
948	KV	KCNB1	Q14721	S	857	N	Polymorphism
949	KV	KCNB1	Q14721	T	210	M	Pathogenic
950	KV	KCNB1	Q14721	T	374	I	Pathogenic
951	KV	KCNB1	Q14721	T	576	K	Unclassified
952	KV	KCNB1	Q14721	T	616	N	Polymorphism
953	KV	KCNB1	Q14721	T	616	S	Polymorphism
954	KV	KCNB1	Q14721	T	788	K	Polymorphism
955	KV	KCNB1	Q14721	T	804	I	Unclassified
956	KV	KCNB1	Q14721	V	200	I	Unclassified
957	KV	KCNB1	Q14721	V	378	A	Pathogenic
958	KV	KCNB1	Q14721	V	446	I	Unclassified
959	KV	KCNB1	Q14721	V	465	I	Unclassified
960	KV	KCNB1	Q14721	V	526	I	Unclassified
961	KV	KCNB1	Q14721	V	718	M	Unclassified
962	KV	KCNB1	Q14721	W	370	R	Pathogenic
963	KV	KCNB2	Q92953	E	657	G	Polymorphism
964	KV	KCNB2	Q92953	V	450	I	Unclassified
965	KV	KCNC1	P48547	R	320	H	Pathogenic
966	KV	KCNC1	P48547	V	476	I	Unclassified
967	KV	KCNC3	Q14003	A	16	T	Polymorphism
968	KV	KCNC3	Q14003	D	129	N	Unclassified
969	KV	KCNC3	Q14003	D	477	N	Unclassified
970	KV	KCNC3	Q14003	D	63	G	Polymorphism
971	KV	KCNC3	Q14003	D	746	N	Unclassified
972	KV	KCNC3	Q14003	E	652	K	Unclassified
973	KV	KCNC3	Q14003	F	448	L	Pathogenic
974	KV	KCNC3	Q14003	G	263	D	Polymorphism
975	KV	KCNC3	Q14003	G	331	R	Unclassified
976	KV	KCNC3	Q14003	G	643	S	Unclassified
977	KV	KCNC3	Q14003	I	337	T	Unclassified
978	KV	KCNC3	Q14003	I	693	M	Pathogenic
979	KV	KCNC3	Q14003	M	509	V	Unclassified
980	KV	KCNC3	Q14003	M	550	V	Unclassified
981	KV	KCNC3	Q14003	P	257	T	Unclassified
982	KV	KCNC3	Q14003	P	43	S	Polymorphism
983	KV	KCNC3	Q14003	P	587	L	Polymorphism
984	KV	KCNC3	Q14003	P	645	R	Unclassified
985	KV	KCNC3	Q14003	P	647	L	Unclassified
986	KV	KCNC3	Q14003	Q	41	H	Polymorphism
987	KV	KCNC3	Q14003	R	366	H	Unclassified
988	KV	KCNC3	Q14003	R	420	H	Pathogenic
989	KV	KCNC3	Q14003	R	423	H	Pathogenic
990	KV	KCNC3	Q14003	R	565	W	Unclassified
991	KV	KCNC3	Q14003	R	698	H	Polymorphism
992	KV	KCNC3	Q14003	S	399	L	Unclassified
993	KV	KCNC3	Q14003	S	591	G	Unclassified
994	KV	KCNC3	Q14003	S	8	W	Unclassified
995	KV	KCNC3	Q14003	T	428	I	Pathogenic
996	KV	KCNC3	Q14003	V	535	M	Pathogenic
997	KV	KCNC4	Q03721	C	520	Y	Polymorphism
998	KV	KCNC4	Q03721	D	318	Y	Polymorphism
999	KV	KCNC4	Q03721	R	516	Q	Polymorphism
1000	KV	KCND2	Q9NZV8	A	249	V	Polymorphism
1001	KV	KCND2	Q9NZV8	A	441	T	Unclassified
1002	KV	KCND2	Q9NZV8	A	543	V	Unclassified
1003	KV	KCND2	Q9NZV8	F	11	L	Unclassified
1004	KV	KCND2	Q9NZV8	N	442	S	Unclassified
1005	KV	KCND2	Q9NZV8	P	512	S	Unclassified
1006	KV	KCND2	Q9NZV8	R	533	Q	Unclassified
1007	KV	KCND2	Q9NZV8	R	539	H	Unclassified
1008	KV	KCND2	Q9NZV8	R	562	S	Unclassified
1009	KV	KCND2	Q9NZV8	V	404	M	Unclassified
1010	KV	KCND2	Q9NZV8	Y	413	C	Unclassified
1011	KV	KCND3	Q9UK17	A	15	V	Unclassified
1012	KV	KCND3	Q9UK17	A	172	T	Unclassified
1013	KV	KCND3	Q9UK17	A	2	E	Unclassified
1014	KV	KCND3	Q9UK17	A	30	D	Unclassified
1015	KV	KCND3	Q9UK17	D	149	G	Unclassified
1016	KV	KCND3	Q9UK17	E	145	K	Unclassified
1017	KV	KCND3	Q9UK17	E	343	K	Unclassified
1018	KV	KCND3	Q9UK17	E	452	K	Unclassified
1019	KV	KCND3	Q9UK17	F	185	L	Unclassified
1020	KV	KCND3	Q9UK17	F	351	L	Pathogenic
1021	KV	KCND3	Q9UK17	G	273	S	Unclassified
1022	KV	KCND3	Q9UK17	G	345	V	Pathogenic
1023	KV	KCND3	Q9UK17	G	371	R	Pathogenic
1024	KV	KCND3	Q9UK17	G	384	S	Pathogenic
1025	KV	KCND3	Q9UK17	G	600	R	Unclassified
1026	KV	KCND3	Q9UK17	I	617	V	Unclassified
1027	KV	KCND3	Q9UK17	I	642	F	Unclassified
1028	KV	KCND3	Q9UK17	I	645	T	Unclassified
1029	KV	KCND3	Q9UK17	K	214	R	Unclassified
1030	KV	KCND3	Q9UK17	L	450	F	Unclassified
1031	KV	KCND3	Q9UK17	L	471	F	Unclassified
1032	KV	KCND3	Q9UK17	L	586	V	Unclassified
1033	KV	KCND3	Q9UK17	M	373	I	Unclassified
1034	KV	KCND3	Q9UK17	M	515	L	Unclassified
1035	KV	KCND3	Q9UK17	M	525	V	Polymorphism
1036	KV	KCND3	Q9UK17	M	570	T	Unclassified
1037	KV	KCND3	Q9UK17	N	639	K	Unclassified
1038	KV	KCND3	Q9UK17	P	31	S	Unclassified
1039	KV	KCND3	Q9UK17	P	534	L	Unclassified
1040	KV	KCND3	Q9UK17	R	13	Q	Unclassified
1041	KV	KCND3	Q9UK17	R	419	H	Unclassified
1042	KV	KCND3	Q9UK17	R	431	H	Unclassified
1043	KV	KCND3	Q9UK17	R	446	C	Unclassified
1044	KV	KCND3	Q9UK17	R	549	C	Unclassified
1045	KV	KCND3	Q9UK17	R	549	H	Unclassified
1046	KV	KCND3	Q9UK17	R	568	H	Unclassified
1047	KV	KCND3	Q9UK17	R	590	H	Polymorphism
1048	KV	KCND3	Q9UK17	S	223	P	Unclassified
1049	KV	KCND3	Q9UK17	S	385	P	Pathogenic
1050	KV	KCND3	Q9UK17	S	390	N	Unclassified
1051	KV	KCND3	Q9UK17	S	438	W	Unclassified
1052	KV	KCND3	Q9UK17	S	499	C	Unclassified
1053	KV	KCND3	Q9UK17	S	530	R	Unclassified
1054	KV	KCND3	Q9UK17	S	581	C	Unclassified
1055	KV	KCND3	Q9UK17	T	209	M	Unclassified
1056	KV	KCND3	Q9UK17	T	313	A	Unclassified
1057	KV	KCND3	Q9UK17	T	352	A	Unclassified
1058	KV	KCND3	Q9UK17	T	352	P	Pathogenic
1059	KV	KCND3	Q9UK17	T	377	M	Pathogenic
1060	KV	KCND3	Q9UK17	T	457	M	Unclassified
1061	KV	KCND3	Q9UK17	T	486	A	Unclassified
1062	KV	KCND3	Q9UK17	V	338	E	Pathogenic
1063	KV	KCND3	Q9UK17	V	392	I	Unclassified
1064	KV	KCND3	Q9UK17	V	399	L	Pathogenic
1065	KV	KCND3	Q9UK17	V	94	M	Unclassified
1066	KV	KCND3	Q9UK17	Y	133	H	Unclassified
1067	KV	KCNF1	Q9H3M0	P	83	L	Unclassified
1068	KV	KCNG1	Q9UIX4	I	304	M	Polymorphism
1069	KV	KCNG4	Q8TDN1	C	255	Y	Polymorphism
1070	KV	KCNG4	Q8TDN1	E	321	K	Polymorphism
1071	KV	KCNG4	Q8TDN1	G	325	R	Polymorphism
1072	KV	KCNG4	Q8TDN1	G	8	W	Polymorphism
1073	KV	KCNG4	Q8TDN1	R	206	W	Polymorphism
1074	KV	KCNG4	Q8TDN1	R	427	H	Polymorphism
1075	KV	KCNH1	O95259	F	502	S	Unclassified
1076	KV	KCNH1	O95259	G	375	R	Pathogenic
1077	KV	KCNH1	O95259	G	496	R	Pathogenic
1078	KV	KCNH1	O95259	I	494	V	Pathogenic
1079	KV	KCNH1	O95259	K	199	R	Pathogenic
1080	KV	KCNH1	O95259	K	217	N	Pathogenic
1081	KV	KCNH1	O95259	K	354	N	Pathogenic
1082	KV	KCNH1	O95259	L	379	P	Pathogenic
1083	KV	KCNH1	O95259	L	379	V	Pathogenic
1084	KV	KCNH1	O95259	L	489	F	Pathogenic
1085	KV	KCNH1	O95259	L	516	F	Pathogenic
1086	KV	KCNH1	O95259	Q	503	R	Pathogenic
1087	KV	KCNH1	O95259	R	357	Q	Pathogenic
1088	KV	KCNH1	O95259	S	352	Y	Pathogenic
1089	KV	KCNH1	O95259	V	383	L	Pathogenic
1090	KV	KCNH1	O95259	V	569	M	Pathogenic
1091	KV	KCNH2	Q12809	A	1017	S	Unclassified
1092	KV	KCNH2	Q12809	A	1058	E	Unclassified
1093	KV	KCNH2	Q12809	A	1058	T	Unclassified
1094	KV	KCNH2	Q12809	A	1077	T	Unclassified
1095	KV	KCNH2	Q12809	A	1116	V	Unclassified
1096	KV	KCNH2	Q12809	A	1144	T	Unclassified
1097	KV	KCNH2	Q12809	A	172	V	Unclassified
1098	KV	KCNH2	Q12809	A	175	D	Unclassified
1099	KV	KCNH2	Q12809	A	175	T	Unclassified
1100	KV	KCNH2	Q12809	A	188	V	Unclassified
1101	KV	KCNH2	Q12809	A	190	T	Unclassified
1102	KV	KCNH2	Q12809	A	203	T	Unclassified
1103	KV	KCNH2	Q12809	A	228	P	Unclassified
1104	KV	KCNH2	Q12809	A	233	S	Polymorphism
1105	KV	KCNH2	Q12809	A	244	V	Unclassified
1106	KV	KCNH2	Q12809	A	253	G	Unclassified
1107	KV	KCNH2	Q12809	A	260	P	Unclassified
1108	KV	KCNH2	Q12809	A	260	V	Unclassified
1109	KV	KCNH2	Q12809	A	277	D	Unclassified
1110	KV	KCNH2	Q12809	A	285	S	Unclassified
1111	KV	KCNH2	Q12809	A	285	T	Unclassified
1112	KV	KCNH2	Q12809	A	290	P	Unclassified
1113	KV	KCNH2	Q12809	A	290	S	Unclassified
1114	KV	KCNH2	Q12809	A	293	S	Unclassified
1115	KV	KCNH2	Q12809	A	32	T	Unclassified
1116	KV	KCNH2	Q12809	A	40	V	Pathogenic
1117	KV	KCNH2	Q12809	A	422	T	Pathogenic
1118	KV	KCNH2	Q12809	A	429	P	Unclassified
1119	KV	KCNH2	Q12809	A	442	V	Unclassified
1120	KV	KCNH2	Q12809	A	448	S	Unclassified
1121	KV	KCNH2	Q12809	A	490	P	Unclassified
1122	KV	KCNH2	Q12809	A	490	T	Pathogenic
1123	KV	KCNH2	Q12809	A	558	E	Unclassified
1124	KV	KCNH2	Q12809	A	558	P	Pathogenic
1125	KV	KCNH2	Q12809	A	561	P	Pathogenic
1126	KV	KCNH2	Q12809	A	561	T	Pathogenic
1127	KV	KCNH2	Q12809	A	561	V	Pathogenic
1128	KV	KCNH2	Q12809	A	565	P	Pathogenic
1129	KV	KCNH2	Q12809	A	565	S	Unclassified
1130	KV	KCNH2	Q12809	A	565	T	Unclassified
1131	KV	KCNH2	Q12809	A	565	V	Pathogenic
1132	KV	KCNH2	Q12809	A	57	P	Unclassified
1133	KV	KCNH2	Q12809	A	57	V	Pathogenic
1134	KV	KCNH2	Q12809	A	614	V	Pathogenic
1135	KV	KCNH2	Q12809	A	715	V	Unclassified
1136	KV	KCNH2	Q12809	A	746	S	Unclassified
1137	KV	KCNH2	Q12809	A	753	S	Unclassified
1138	KV	KCNH2	Q12809	A	755	T	Pathogenic
1139	KV	KCNH2	Q12809	A	78	P	Unclassified
1140	KV	KCNH2	Q12809	A	79	P	Pathogenic
1141	KV	KCNH2	Q12809	A	79	S	Unclassified
1142	KV	KCNH2	Q12809	A	797	D	Pathogenic
1143	KV	KCNH2	Q12809	A	80	P	Unclassified
1144	KV	KCNH2	Q12809	A	80	V	Unclassified
1145	KV	KCNH2	Q12809	A	85	P	Unclassified
1146	KV	KCNH2	Q12809	A	85	T	Unclassified
1147	KV	KCNH2	Q12809	A	85	V	Unclassified
1148	KV	KCNH2	Q12809	A	9	V	Unclassified
1149	KV	KCNH2	Q12809	A	907	T	Unclassified
1150	KV	KCNH2	Q12809	A	913	V	Unclassified
1151	KV	KCNH2	Q12809	A	915	V	Unclassified
1152	KV	KCNH2	Q12809	A	97	G	Unclassified
1153	KV	KCNH2	Q12809	C	108	R	Unclassified
1154	KV	KCNH2	Q12809	C	1117	F	Unclassified
1155	KV	KCNH2	Q12809	C	1117	Y	Unclassified
1156	KV	KCNH2	Q12809	C	39	R	Unclassified
1157	KV	KCNH2	Q12809	C	44	F	Unclassified
1158	KV	KCNH2	Q12809	C	44	W	Unclassified
1159	KV	KCNH2	Q12809	C	49	W	Pathogenic
1160	KV	KCNH2	Q12809	C	49	Y	Unclassified
1161	KV	KCNH2	Q12809	C	555	Y	Pathogenic
1162	KV	KCNH2	Q12809	C	566	F	Unclassified
1163	KV	KCNH2	Q12809	C	566	G	Unclassified
1164	KV	KCNH2	Q12809	C	566	S	Unclassified
1165	KV	KCNH2	Q12809	C	64	W	Unclassified
1166	KV	KCNH2	Q12809	C	64	Y	Unclassified
1167	KV	KCNH2	Q12809	C	66	G	Unclassified
1168	KV	KCNH2	Q12809	C	66	R	Unclassified
1169	KV	KCNH2	Q12809	C	66	Y	Pathogenic
1170	KV	KCNH2	Q12809	C	723	R	Unclassified
1171	KV	KCNH2	Q12809	C	723	Y	Unclassified
1172	KV	KCNH2	Q12809	C	977	F	Unclassified
1173	KV	KCNH2	Q12809	D	1003	N	Unclassified
1174	KV	KCNH2	Q12809	D	1003	Y	Pathogenic
1175	KV	KCNH2	Q12809	D	102	A	Unclassified
1176	KV	KCNH2	Q12809	D	102	V	Unclassified
1177	KV	KCNH2	Q12809	D	1037	N	Unclassified
1178	KV	KCNH2	Q12809	D	111	V	Unclassified
1179	KV	KCNH2	Q12809	D	119	H	Unclassified
1180	KV	KCNH2	Q12809	D	144	V	Unclassified
1181	KV	KCNH2	Q12809	D	16	A	Unclassified
1182	KV	KCNH2	Q12809	D	219	V	Pathogenic
1183	KV	KCNH2	Q12809	D	259	N	Unclassified
1184	KV	KCNH2	Q12809	D	321	Y	Unclassified
1185	KV	KCNH2	Q12809	D	323	N	Unclassified
1186	KV	KCNH2	Q12809	D	342	V	Unclassified
1187	KV	KCNH2	Q12809	D	456	Y	Unclassified
1188	KV	KCNH2	Q12809	D	46	N	Pathogenic
1189	KV	KCNH2	Q12809	D	460	Y	Unclassified
1190	KV	KCNH2	Q12809	D	466	Y	Unclassified
1191	KV	KCNH2	Q12809	D	501	G	Pathogenic
1192	KV	KCNH2	Q12809	D	501	H	Unclassified
1193	KV	KCNH2	Q12809	D	501	N	Pathogenic
1194	KV	KCNH2	Q12809	D	509	N	Unclassified
1195	KV	KCNH2	Q12809	D	580	H	Pathogenic
1196	KV	KCNH2	Q12809	D	609	A	Unclassified
1197	KV	KCNH2	Q12809	D	609	G	Unclassified
1198	KV	KCNH2	Q12809	D	609	H	Unclassified
1199	KV	KCNH2	Q12809	D	609	N	Pathogenic
1200	KV	KCNH2	Q12809	D	609	Y	Unclassified
1201	KV	KCNH2	Q12809	D	767	Y	Unclassified
1202	KV	KCNH2	Q12809	D	774	Y	Pathogenic
1203	KV	KCNH2	Q12809	D	837	G	Pathogenic
1204	KV	KCNH2	Q12809	D	837	N	Pathogenic
1205	KV	KCNH2	Q12809	D	837	Y	Unclassified
1206	KV	KCNH2	Q12809	D	864	G	Unclassified
1207	KV	KCNH2	Q12809	D	982	N	Unclassified
1208	KV	KCNH2	Q12809	E	1119	Q	Unclassified
1209	KV	KCNH2	Q12809	E	130	K	Unclassified
1210	KV	KCNH2	Q12809	E	289	K	Unclassified
1211	KV	KCNH2	Q12809	E	444	D	Unclassified
1212	KV	KCNH2	Q12809	E	444	K	Unclassified
1213	KV	KCNH2	Q12809	E	50	D	Unclassified
1214	KV	KCNH2	Q12809	E	575	G	Unclassified
1215	KV	KCNH2	Q12809	E	58	A	Unclassified
1216	KV	KCNH2	Q12809	E	58	D	Unclassified
1217	KV	KCNH2	Q12809	E	58	G	Pathogenic
1218	KV	KCNH2	Q12809	E	58	K	Pathogenic
1219	KV	KCNH2	Q12809	E	637	D	Unclassified
1220	KV	KCNH2	Q12809	E	637	G	Unclassified
1221	KV	KCNH2	Q12809	E	637	K	Pathogenic
1222	KV	KCNH2	Q12809	E	788	D	Unclassified
1223	KV	KCNH2	Q12809	E	788	K	Pathogenic
1224	KV	KCNH2	Q12809	E	876	K	Unclassified
1225	KV	KCNH2	Q12809	E	904	V	Unclassified
1226	KV	KCNH2	Q12809	E	944	D	Unclassified
1227	KV	KCNH2	Q12809	E	95	A	Unclassified
1228	KV	KCNH2	Q12809	E	978	K	Polymorphism
1229	KV	KCNH2	Q12809	F	106	L	Unclassified
1230	KV	KCNH2	Q12809	F	106	Y	Unclassified
1231	KV	KCNH2	Q12809	F	125	C	Unclassified
1232	KV	KCNH2	Q12809	F	129	L	Pathogenic
1233	KV	KCNH2	Q12809	F	22	S	Unclassified
1234	KV	KCNH2	Q12809	F	29	L	Unclassified
1235	KV	KCNH2	Q12809	F	29	S	Unclassified
1236	KV	KCNH2	Q12809	F	348	Y	Unclassified
1237	KV	KCNH2	Q12809	F	431	L	Unclassified
1238	KV	KCNH2	Q12809	F	463	L	Unclassified
1239	KV	KCNH2	Q12809	F	513	L	Unclassified
1240	KV	KCNH2	Q12809	F	551	S	Unclassified
1241	KV	KCNH2	Q12809	F	617	L	Pathogenic
1242	KV	KCNH2	Q12809	F	627	I	Unclassified
1243	KV	KCNH2	Q12809	F	627	L	Pathogenic
1244	KV	KCNH2	Q12809	F	627	L	Unclassified
1245	KV	KCNH2	Q12809	F	640	L	Pathogenic
1246	KV	KCNH2	Q12809	F	640	L	Unclassified
1247	KV	KCNH2	Q12809	F	640	V	Unclassified
1248	KV	KCNH2	Q12809	F	656	C	Unclassified
1249	KV	KCNH2	Q12809	F	68	L	Pathogenic
1250	KV	KCNH2	Q12809	F	781	L	Unclassified
1251	KV	KCNH2	Q12809	F	805	C	Pathogenic
1252	KV	KCNH2	Q12809	F	805	S	Pathogenic
1253	KV	KCNH2	Q12809	G	1036	D	Unclassified
1254	KV	KCNH2	Q12809	G	1154	S	Unclassified
1255	KV	KCNH2	Q12809	G	149	A	Unclassified
1256	KV	KCNH2	Q12809	G	187	S	Unclassified
1257	KV	KCNH2	Q12809	G	224	R	Unclassified
1258	KV	KCNH2	Q12809	G	236	V	Unclassified
1259	KV	KCNH2	Q12809	G	238	S	Unclassified
1260	KV	KCNH2	Q12809	G	246	C	Polymorphism
1261	KV	KCNH2	Q12809	G	294	V	Unclassified
1262	KV	KCNH2	Q12809	G	306	R	Pathogenic
1263	KV	KCNH2	Q12809	G	306	W	Pathogenic
1264	KV	KCNH2	Q12809	G	314	S	Unclassified
1265	KV	KCNH2	Q12809	G	47	C	Pathogenic
1266	KV	KCNH2	Q12809	G	47	V	Unclassified
1267	KV	KCNH2	Q12809	G	487	S	Unclassified
1268	KV	KCNH2	Q12809	G	522	R	Unclassified
1269	KV	KCNH2	Q12809	G	53	D	Unclassified
1270	KV	KCNH2	Q12809	G	53	R	Unclassified
1271	KV	KCNH2	Q12809	G	53	S	Unclassified
1272	KV	KCNH2	Q12809	G	572	A	Pathogenic
1273	KV	KCNH2	Q12809	G	572	C	Unclassified
1274	KV	KCNH2	Q12809	G	572	D	Unclassified
1275	KV	KCNH2	Q12809	G	572	R	Pathogenic
1276	KV	KCNH2	Q12809	G	572	S	Pathogenic
1277	KV	KCNH2	Q12809	G	572	V	Pathogenic
1278	KV	KCNH2	Q12809	G	584	C	Pathogenic
1279	KV	KCNH2	Q12809	G	584	R	Unclassified
1280	KV	KCNH2	Q12809	G	584	S	Pathogenic
1281	KV	KCNH2	Q12809	G	584	V	Unclassified
1282	KV	KCNH2	Q12809	G	590	V	Unclassified
1283	KV	KCNH2	Q12809	G	594	D	Unclassified
1284	KV	KCNH2	Q12809	G	601	C	Unclassified
1285	KV	KCNH2	Q12809	G	601	D	Pathogenic
1286	KV	KCNH2	Q12809	G	601	S	Pathogenic
1287	KV	KCNH2	Q12809	G	603	D	Unclassified
1288	KV	KCNH2	Q12809	G	604	D	Unclassified
1289	KV	KCNH2	Q12809	G	604	S	Pathogenic
1290	KV	KCNH2	Q12809	G	604	V	Unclassified
1291	KV	KCNH2	Q12809	G	626	A	Unclassified
1292	KV	KCNH2	Q12809	G	626	D	Unclassified
1293	KV	KCNH2	Q12809	G	626	S	Pathogenic
1294	KV	KCNH2	Q12809	G	626	V	Unclassified
1295	KV	KCNH2	Q12809	G	628	A	Unclassified
1296	KV	KCNH2	Q12809	G	628	R	Pathogenic
1297	KV	KCNH2	Q12809	G	628	S	Pathogenic
1298	KV	KCNH2	Q12809	G	628	V	Unclassified
1299	KV	KCNH2	Q12809	G	648	D	Pathogenic
1300	KV	KCNH2	Q12809	G	648	S	Unclassified
1301	KV	KCNH2	Q12809	G	657	C	Unclassified
1302	KV	KCNH2	Q12809	G	657	R	Unclassified
1303	KV	KCNH2	Q12809	G	657	S	Pathogenic
1304	KV	KCNH2	Q12809	G	657	V	Pathogenic
1305	KV	KCNH2	Q12809	G	71	E	Pathogenic
1306	KV	KCNH2	Q12809	G	71	R	Pathogenic
1307	KV	KCNH2	Q12809	G	749	C	Unclassified
1308	KV	KCNH2	Q12809	G	749	V	Unclassified
1309	KV	KCNH2	Q12809	G	766	R	Unclassified
1310	KV	KCNH2	Q12809	G	766	W	Unclassified
1311	KV	KCNH2	Q12809	G	785	A	Unclassified
1312	KV	KCNH2	Q12809	G	785	V	Unclassified
1313	KV	KCNH2	Q12809	G	800	E	Unclassified
1314	KV	KCNH2	Q12809	G	800	W	Unclassified
1315	KV	KCNH2	Q12809	G	806	A	Pathogenic
1316	KV	KCNH2	Q12809	G	806	E	Pathogenic
1317	KV	KCNH2	Q12809	G	820	R	Pathogenic
1318	KV	KCNH2	Q12809	G	873	S	Polymorphism
1319	KV	KCNH2	Q12809	G	879	R	Unclassified
1320	KV	KCNH2	Q12809	G	903	R	Unclassified
1321	KV	KCNH2	Q12809	G	924	A	Unclassified
1322	KV	KCNH2	Q12809	G	924	E	Unclassified
1323	KV	KCNH2	Q12809	G	924	R	Unclassified
1324	KV	KCNH2	Q12809	G	924	W	Unclassified
1325	KV	KCNH2	Q12809	G	925	A	Unclassified
1326	KV	KCNH2	Q12809	G	925	R	Unclassified
1327	KV	KCNH2	Q12809	G	925	V	Unclassified
1328	KV	KCNH2	Q12809	G	965	R	Unclassified
1329	KV	KCNH2	Q12809	H	1153	Y	Unclassified
1330	KV	KCNH2	Q12809	H	147	R	Unclassified
1331	KV	KCNH2	Q12809	H	254	Q	Unclassified
1332	KV	KCNH2	Q12809	H	309	Y	Unclassified
1333	KV	KCNH2	Q12809	H	402	R	Unclassified
1334	KV	KCNH2	Q12809	H	492	L	Unclassified
1335	KV	KCNH2	Q12809	H	492	Y	Unclassified
1336	KV	KCNH2	Q12809	H	562	P	Unclassified
1337	KV	KCNH2	Q12809	H	562	Q	Pathogenic
1338	KV	KCNH2	Q12809	H	562	R	Unclassified
1339	KV	KCNH2	Q12809	H	562	Y	Unclassified
1340	KV	KCNH2	Q12809	H	578	P	Unclassified
1341	KV	KCNH2	Q12809	H	687	Y	Unclassified
1342	KV	KCNH2	Q12809	H	70	N	Unclassified
1343	KV	KCNH2	Q12809	H	70	R	Pathogenic
1344	KV	KCNH2	Q12809	H	731	P	Pathogenic
1345	KV	KCNH2	Q12809	H	739	R	Unclassified
1346	KV	KCNH2	Q12809	H	771	R	Unclassified
1347	KV	KCNH2	Q12809	I	19	F	Unclassified
1348	KV	KCNH2	Q12809	I	30	T	Unclassified
1349	KV	KCNH2	Q12809	I	31	N	Pathogenic
1350	KV	KCNH2	Q12809	I	31	S	Unclassified
1351	KV	KCNH2	Q12809	I	31	T	Pathogenic
1352	KV	KCNH2	Q12809	I	359	K	Unclassified
1353	KV	KCNH2	Q12809	I	400	N	Unclassified
1354	KV	KCNH2	Q12809	I	42	N	Unclassified
1355	KV	KCNH2	Q12809	I	42	T	Pathogenic
1356	KV	KCNH2	Q12809	I	458	F	Unclassified
1357	KV	KCNH2	Q12809	I	489	F	Unclassified
1358	KV	KCNH2	Q12809	I	567	T	Unclassified
1359	KV	KCNH2	Q12809	I	571	L	Unclassified
1360	KV	KCNH2	Q12809	I	571	V	Unclassified
1361	KV	KCNH2	Q12809	I	583	V	Unclassified
1362	KV	KCNH2	Q12809	I	593	K	Pathogenic
1363	KV	KCNH2	Q12809	I	593	R	Pathogenic
1364	KV	KCNH2	Q12809	I	593	T	Pathogenic
1365	KV	KCNH2	Q12809	I	593	V	Unclassified
1366	KV	KCNH2	Q12809	I	607	F	Pathogenic
1367	KV	KCNH2	Q12809	I	655	V	Unclassified
1368	KV	KCNH2	Q12809	I	662	T	Unclassified
1369	KV	KCNH2	Q12809	I	711	V	Pathogenic
1370	KV	KCNH2	Q12809	I	728	F	Unclassified
1371	KV	KCNH2	Q12809	I	787	N	Unclassified
1372	KV	KCNH2	Q12809	I	789	T	Unclassified
1373	KV	KCNH2	Q12809	I	82	T	Pathogenic
1374	KV	KCNH2	Q12809	I	858	T	Unclassified
1375	KV	KCNH2	Q12809	I	96	T	Unclassified
1376	KV	KCNH2	Q12809	I	96	V	Unclassified
1377	KV	KCNH2	Q12809	K	101	E	Pathogenic
1378	KV	KCNH2	Q12809	K	101	N	Pathogenic
1379	KV	KCNH2	Q12809	K	28	E	Unclassified
1380	KV	KCNH2	Q12809	K	525	N	Unclassified
1381	KV	KCNH2	Q12809	K	538	E	Unclassified
1382	KV	KCNH2	Q12809	K	595	E	Unclassified
1383	KV	KCNH2	Q12809	K	595	N	Unclassified
1384	KV	KCNH2	Q12809	K	638	E	Unclassified
1385	KV	KCNH2	Q12809	K	638	N	Unclassified
1386	KV	KCNH2	Q12809	K	638	R	Pathogenic
1387	KV	KCNH2	Q12809	K	741	R	Unclassified
1388	KV	KCNH2	Q12809	K	757	N	Unclassified
1389	KV	KCNH2	Q12809	K	897	M	Unclassified
1390	KV	KCNH2	Q12809	K	897	T	Polymorphism
1391	KV	KCNH2	Q12809	K	93	R	Polymorphism
1392	KV	KCNH2	Q12809	L	1027	I	Polymorphism
1393	KV	KCNH2	Q12809	L	1042	P	Pathogenic
1394	KV	KCNH2	Q12809	L	1042	V	Unclassified
1395	KV	KCNH2	Q12809	L	1045	F	Polymorphism
1396	KV	KCNH2	Q12809	L	1049	P	Unclassified
1397	KV	KCNH2	Q12809	L	1066	V	Unclassified
1398	KV	KCNH2	Q12809	L	109	R	Unclassified
1399	KV	KCNH2	Q12809	L	1108	V	Unclassified
1400	KV	KCNH2	Q12809	L	1150	M	Unclassified
1401	KV	KCNH2	Q12809	L	127	F	Pathogenic
1402	KV	KCNH2	Q12809	L	15	Q	Pathogenic
1403	KV	KCNH2	Q12809	L	413	P	Unclassified
1404	KV	KCNH2	Q12809	L	413	R	Pathogenic
1405	KV	KCNH2	Q12809	L	499	R	Pathogenic
1406	KV	KCNH2	Q12809	L	523	M	Unclassified
1407	KV	KCNH2	Q12809	L	552	S	Pathogenic
1408	KV	KCNH2	Q12809	L	559	F	Pathogenic
1409	KV	KCNH2	Q12809	L	559	H	Unclassified
1410	KV	KCNH2	Q12809	L	564	P	Unclassified
1411	KV	KCNH2	Q12809	L	564	Q	Unclassified
1412	KV	KCNH2	Q12809	L	602	P	Unclassified
1413	KV	KCNH2	Q12809	L	615	F	Unclassified
1414	KV	KCNH2	Q12809	L	615	V	Unclassified
1415	KV	KCNH2	Q12809	L	622	F	Unclassified
1416	KV	KCNH2	Q12809	L	678	P	Unclassified
1417	KV	KCNH2	Q12809	L	69	P	Unclassified
1418	KV	KCNH2	Q12809	L	69	Q	Unclassified
1419	KV	KCNH2	Q12809	L	693	P	Unclassified
1420	KV	KCNH2	Q12809	L	724	P	Unclassified
1421	KV	KCNH2	Q12809	L	754	R	Unclassified
1422	KV	KCNH2	Q12809	L	776	F	Pathogenic
1423	KV	KCNH2	Q12809	L	799	P	Pathogenic
1424	KV	KCNH2	Q12809	L	842	P	Unclassified
1425	KV	KCNH2	Q12809	L	86	P	Unclassified
1426	KV	KCNH2	Q12809	L	86	R	Unclassified
1427	KV	KCNH2	Q12809	L	87	P	Unclassified
1428	KV	KCNH2	Q12809	L	889	V	Unclassified
1429	KV	KCNH2	Q12809	L	955	V	Unclassified
1430	KV	KCNH2	Q12809	M	1	L	Unclassified
1431	KV	KCNH2	Q12809	M	1115	V	Unclassified
1432	KV	KCNH2	Q12809	M	124	R	Unclassified
1433	KV	KCNH2	Q12809	M	124	T	Unclassified
1434	KV	KCNH2	Q12809	M	133	T	Unclassified
1435	KV	KCNH2	Q12809	M	218	V	Unclassified
1436	KV	KCNH2	Q12809	M	291	R	Unclassified
1437	KV	KCNH2	Q12809	M	291	T	Unclassified
1438	KV	KCNH2	Q12809	M	574	V	Unclassified
1439	KV	KCNH2	Q12809	M	579	T	Unclassified
1440	KV	KCNH2	Q12809	M	645	I	Unclassified
1441	KV	KCNH2	Q12809	M	645	L	Unclassified
1442	KV	KCNH2	Q12809	M	645	V	Pathogenic
1443	KV	KCNH2	Q12809	M	651	R	Pathogenic
1444	KV	KCNH2	Q12809	M	756	V	Unclassified
1445	KV	KCNH2	Q12809	N	128	S	Unclassified
1446	KV	KCNH2	Q12809	N	257	H	Unclassified
1447	KV	KCNH2	Q12809	N	317	S	Unclassified
1448	KV	KCNH2	Q12809	N	33	T	Pathogenic
1449	KV	KCNH2	Q12809	N	45	K	Unclassified
1450	KV	KCNH2	Q12809	N	45	Y	Unclassified
1451	KV	KCNH2	Q12809	N	470	D	Pathogenic
1452	KV	KCNH2	Q12809	N	588	D	Unclassified
1453	KV	KCNH2	Q12809	N	588	K	Pathogenic
1454	KV	KCNH2	Q12809	N	629	D	Pathogenic
1455	KV	KCNH2	Q12809	N	629	I	Unclassified
1456	KV	KCNH2	Q12809	N	629	K	Unclassified
1457	KV	KCNH2	Q12809	N	629	S	Pathogenic
1458	KV	KCNH2	Q12809	N	629	T	Pathogenic
1459	KV	KCNH2	Q12809	N	633	D	Unclassified
1460	KV	KCNH2	Q12809	N	633	I	Unclassified
1461	KV	KCNH2	Q12809	N	633	S	Pathogenic
1462	KV	KCNH2	Q12809	N	635	D	Unclassified
1463	KV	KCNH2	Q12809	N	635	I	Unclassified
1464	KV	KCNH2	Q12809	N	635	K	Unclassified
1465	KV	KCNH2	Q12809	N	635	S	Unclassified
1466	KV	KCNH2	Q12809	N	658	S	Unclassified
1467	KV	KCNH2	Q12809	N	802	S	Unclassified
1468	KV	KCNH2	Q12809	N	861	H	Unclassified
1469	KV	KCNH2	Q12809	N	861	I	Pathogenic
1470	KV	KCNH2	Q12809	N	861	S	Pathogenic
1471	KV	KCNH2	Q12809	N	861	T	Unclassified
1472	KV	KCNH2	Q12809	N	985	S	Unclassified
1473	KV	KCNH2	Q12809	N	996	I	Pathogenic
1474	KV	KCNH2	Q12809	P	1016	L	Polymorphism
1475	KV	KCNH2	Q12809	P	1016	S	Polymorphism
1476	KV	KCNH2	Q12809	P	1018	A	Unclassified
1477	KV	KCNH2	Q12809	P	1020	S	Unclassified
1478	KV	KCNH2	Q12809	P	1026	L	Polymorphism
1479	KV	KCNH2	Q12809	P	1075	L	Unclassified
1480	KV	KCNH2	Q12809	P	1084	L	Unclassified
1481	KV	KCNH2	Q12809	P	1093	L	Unclassified
1482	KV	KCNH2	Q12809	P	1096	T	Unclassified
1483	KV	KCNH2	Q12809	P	1099	L	Unclassified
1484	KV	KCNH2	Q12809	P	1101	L	Unclassified
1485	KV	KCNH2	Q12809	P	1101	S	Unclassified
1486	KV	KCNH2	Q12809	P	1122	L	Unclassified
1487	KV	KCNH2	Q12809	P	1122	R	Unclassified
1488	KV	KCNH2	Q12809	P	1132	A	Unclassified
1489	KV	KCNH2	Q12809	P	1139	L	Unclassified
1490	KV	KCNH2	Q12809	P	114	S	Unclassified
1491	KV	KCNH2	Q12809	P	1157	L	Unclassified
1492	KV	KCNH2	Q12809	P	1157	S	Unclassified
1493	KV	KCNH2	Q12809	P	141	L	Unclassified
1494	KV	KCNH2	Q12809	P	150	S	Unclassified
1495	KV	KCNH2	Q12809	P	151	A	Unclassified
1496	KV	KCNH2	Q12809	P	237	H	Unclassified
1497	KV	KCNH2	Q12809	P	240	L	Unclassified
1498	KV	KCNH2	Q12809	P	241	L	Unclassified
1499	KV	KCNH2	Q12809	P	251	A	Unclassified
1500	KV	KCNH2	Q12809	P	251	S	Unclassified
1501	KV	KCNH2	Q12809	P	258	L	Unclassified
1502	KV	KCNH2	Q12809	P	297	S	Unclassified
1503	KV	KCNH2	Q12809	P	334	L	Pathogenic
1504	KV	KCNH2	Q12809	P	347	S	Unclassified
1505	KV	KCNH2	Q12809	P	361	S	Unclassified
1506	KV	KCNH2	Q12809	P	426	H	Unclassified
1507	KV	KCNH2	Q12809	P	440	L	Unclassified
1508	KV	KCNH2	Q12809	P	451	L	Pathogenic
1509	KV	KCNH2	Q12809	P	507	L	Unclassified
1510	KV	KCNH2	Q12809	P	507	S	Unclassified
1511	KV	KCNH2	Q12809	P	596	A	Pathogenic
1512	KV	KCNH2	Q12809	P	596	H	Pathogenic
1513	KV	KCNH2	Q12809	P	596	L	Unclassified
1514	KV	KCNH2	Q12809	P	596	R	Unclassified
1515	KV	KCNH2	Q12809	P	605	L	Unclassified
1516	KV	KCNH2	Q12809	P	605	S	Unclassified
1517	KV	KCNH2	Q12809	P	63	H	Unclassified
1518	KV	KCNH2	Q12809	P	632	S	Pathogenic
1519	KV	KCNH2	Q12809	P	72	L	Pathogenic
1520	KV	KCNH2	Q12809	P	72	Q	Unclassified
1521	KV	KCNH2	Q12809	P	72	R	Unclassified
1522	KV	KCNH2	Q12809	P	72	S	Pathogenic
1523	KV	KCNH2	Q12809	P	721	L	Pathogenic
1524	KV	KCNH2	Q12809	P	764	L	Unclassified
1525	KV	KCNH2	Q12809	P	846	A	Unclassified
1526	KV	KCNH2	Q12809	P	846	L	Unclassified
1527	KV	KCNH2	Q12809	P	846	S	Unclassified
1528	KV	KCNH2	Q12809	P	846	T	Unclassified
1529	KV	KCNH2	Q12809	P	869	L	Unclassified
1530	KV	KCNH2	Q12809	P	910	L	Unclassified
1531	KV	KCNH2	Q12809	P	917	L	Unclassified
1532	KV	KCNH2	Q12809	P	923	L	Unclassified
1533	KV	KCNH2	Q12809	P	963	T	Unclassified
1534	KV	KCNH2	Q12809	P	964	A	Unclassified
1535	KV	KCNH2	Q12809	P	967	L	Unclassified
1536	KV	KCNH2	Q12809	P	968	A	Unclassified
1537	KV	KCNH2	Q12809	P	968	L	Unclassified
1538	KV	KCNH2	Q12809	Q	1068	R	Unclassified
1539	KV	KCNH2	Q12809	Q	81	H	Unclassified
1540	KV	KCNH2	Q12809	R	100	G	Unclassified
1541	KV	KCNH2	Q12809	R	100	Q	Pathogenic
1542	KV	KCNH2	Q12809	R	100	W	Unclassified
1543	KV	KCNH2	Q12809	R	1005	Q	Unclassified
1544	KV	KCNH2	Q12809	R	1007	H	Unclassified
1545	KV	KCNH2	Q12809	R	1032	Q	Unclassified
1546	KV	KCNH2	Q12809	R	1032	W	Unclassified
1547	KV	KCNH2	Q12809	R	1033	Q	Unclassified
1548	KV	KCNH2	Q12809	R	1033	W	Unclassified
1549	KV	KCNH2	Q12809	R	1035	Q	Unclassified
1550	KV	KCNH2	Q12809	R	1035	W	Unclassified
1551	KV	KCNH2	Q12809	R	1047	C	Unclassified
1552	KV	KCNH2	Q12809	R	1047	L	Unclassified
1553	KV	KCNH2	Q12809	R	1055	Q	Unclassified
1554	KV	KCNH2	Q12809	R	1055	W	Unclassified
1555	KV	KCNH2	Q12809	R	1135	H	Unclassified
1556	KV	KCNH2	Q12809	R	148	Q	Unclassified
1557	KV	KCNH2	Q12809	R	148	W	Unclassified
1558	KV	KCNH2	Q12809	R	164	H	Unclassified
1559	KV	KCNH2	Q12809	R	176	W	Unclassified
1560	KV	KCNH2	Q12809	R	181	Q	Polymorphism
1561	KV	KCNH2	Q12809	R	20	G	Unclassified
1562	KV	KCNH2	Q12809	R	232	L	Unclassified
1563	KV	KCNH2	Q12809	R	242	G	Unclassified
1564	KV	KCNH2	Q12809	R	252	G	Unclassified
1565	KV	KCNH2	Q12809	R	252	Q	Unclassified
1566	KV	KCNH2	Q12809	R	269	W	Unclassified
1567	KV	KCNH2	Q12809	R	27	H	Pathogenic
1568	KV	KCNH2	Q12809	R	27	P	Unclassified
1569	KV	KCNH2	Q12809	R	271	H	Unclassified
1570	KV	KCNH2	Q12809	R	273	Q	Unclassified
1571	KV	KCNH2	Q12809	R	301	L	Unclassified
1572	KV	KCNH2	Q12809	R	312	C	Unclassified
1573	KV	KCNH2	Q12809	R	312	H	Unclassified
1574	KV	KCNH2	Q12809	R	328	C	Unclassified
1575	KV	KCNH2	Q12809	R	328	H	Unclassified
1576	KV	KCNH2	Q12809	R	356	H	Unclassified
1577	KV	KCNH2	Q12809	R	394	H	Unclassified
1578	KV	KCNH2	Q12809	R	397	C	Unclassified
1579	KV	KCNH2	Q12809	R	472	P	Pathogenic
1580	KV	KCNH2	Q12809	R	528	P	Unclassified
1581	KV	KCNH2	Q12809	R	528	W	Unclassified
1582	KV	KCNH2	Q12809	R	531	Q	Unclassified
1583	KV	KCNH2	Q12809	R	531	W	Unclassified
1584	KV	KCNH2	Q12809	R	534	C	Pathogenic
1585	KV	KCNH2	Q12809	R	534	L	Unclassified
1586	KV	KCNH2	Q12809	R	534	S	Unclassified
1587	KV	KCNH2	Q12809	R	537	Q	Pathogenic
1588	KV	KCNH2	Q12809	R	537	W	Unclassified
1589	KV	KCNH2	Q12809	R	56	L	Unclassified
1590	KV	KCNH2	Q12809	R	56	Q	Pathogenic
1591	KV	KCNH2	Q12809	R	582	C	Pathogenic
1592	KV	KCNH2	Q12809	R	582	L	Unclassified
1593	KV	KCNH2	Q12809	R	62	Q	Unclassified
1594	KV	KCNH2	Q12809	R	679	W	Unclassified
1595	KV	KCNH2	Q12809	R	685	C	Unclassified
1596	KV	KCNH2	Q12809	R	694	H	Pathogenic
1597	KV	KCNH2	Q12809	R	696	C	Unclassified
1598	KV	KCNH2	Q12809	R	696	P	Unclassified
1599	KV	KCNH2	Q12809	R	734	C	Unclassified
1600	KV	KCNH2	Q12809	R	744	P	Pathogenic
1601	KV	KCNH2	Q12809	R	752	Q	Pathogenic
1602	KV	KCNH2	Q12809	R	752	W	Pathogenic
1603	KV	KCNH2	Q12809	R	784	W	Pathogenic
1604	KV	KCNH2	Q12809	R	791	W	Unclassified
1605	KV	KCNH2	Q12809	R	823	Q	Pathogenic
1606	KV	KCNH2	Q12809	R	823	W	Pathogenic
1607	KV	KCNH2	Q12809	R	835	Q	Pathogenic
1608	KV	KCNH2	Q12809	R	835	W	Unclassified
1609	KV	KCNH2	Q12809	R	885	C	Unclassified
1610	KV	KCNH2	Q12809	R	885	H	Unclassified
1611	KV	KCNH2	Q12809	R	887	C	Unclassified
1612	KV	KCNH2	Q12809	R	887	H	Unclassified
1613	KV	KCNH2	Q12809	R	892	C	Unclassified
1614	KV	KCNH2	Q12809	R	894	C	Pathogenic
1615	KV	KCNH2	Q12809	R	894	H	Unclassified
1616	KV	KCNH2	Q12809	R	894	L	Unclassified
1617	KV	KCNH2	Q12809	R	912	Q	Unclassified
1618	KV	KCNH2	Q12809	R	912	W	Unclassified
1619	KV	KCNH2	Q12809	R	92	C	Unclassified
1620	KV	KCNH2	Q12809	R	92	L	Pathogenic
1621	KV	KCNH2	Q12809	R	920	G	Unclassified
1622	KV	KCNH2	Q12809	R	920	Q	Unclassified
1623	KV	KCNH2	Q12809	R	920	W	Unclassified
1624	KV	KCNH2	Q12809	R	922	Q	Unclassified
1625	KV	KCNH2	Q12809	R	922	W	Unclassified
1626	KV	KCNH2	Q12809	R	948	C	Pathogenic
1627	KV	KCNH2	Q12809	R	948	H	Pathogenic
1628	KV	KCNH2	Q12809	R	948	S	Unclassified
1629	KV	KCNH2	Q12809	R	954	C	Unclassified
1630	KV	KCNH2	Q12809	R	954	H	Unclassified
1631	KV	KCNH2	Q12809	S	1021	G	Unclassified
1632	KV	KCNH2	Q12809	S	104	R	Unclassified
1633	KV	KCNH2	Q12809	S	1040	G	Unclassified
1634	KV	KCNH2	Q12809	S	1040	N	Unclassified
1635	KV	KCNH2	Q12809	S	1155	L	Unclassified
1636	KV	KCNH2	Q12809	S	182	W	Unclassified
1637	KV	KCNH2	Q12809	S	26	I	Unclassified
1638	KV	KCNH2	Q12809	S	275	R	Unclassified
1639	KV	KCNH2	Q12809	S	320	L	Unclassified
1640	KV	KCNH2	Q12809	S	320	W	Unclassified
1641	KV	KCNH2	Q12809	S	428	L	Unclassified
1642	KV	KCNH2	Q12809	S	428	P	Pathogenic
1643	KV	KCNH2	Q12809	S	55	L	Pathogenic
1644	KV	KCNH2	Q12809	S	581	L	Unclassified
1645	KV	KCNH2	Q12809	S	599	R	Unclassified
1646	KV	KCNH2	Q12809	S	606	P	Unclassified
1647	KV	KCNH2	Q12809	S	621	N	Unclassified
1648	KV	KCNH2	Q12809	S	621	R	Unclassified
1649	KV	KCNH2	Q12809	S	631	A	Unclassified
1650	KV	KCNH2	Q12809	S	631	F	Unclassified
1651	KV	KCNH2	Q12809	S	641	F	Unclassified
1652	KV	KCNH2	Q12809	S	649	F	Unclassified
1653	KV	KCNH2	Q12809	S	649	P	Unclassified
1654	KV	KCNH2	Q12809	S	660	L	Unclassified
1655	KV	KCNH2	Q12809	S	706	C	Unclassified
1656	KV	KCNH2	Q12809	S	706	F	Unclassified
1657	KV	KCNH2	Q12809	S	735	L	Unclassified
1658	KV	KCNH2	Q12809	S	818	L	Pathogenic
1659	KV	KCNH2	Q12809	S	818	P	Unclassified
1660	KV	KCNH2	Q12809	S	906	L	Unclassified
1661	KV	KCNH2	Q12809	S	930	R	Unclassified
1662	KV	KCNH2	Q12809	S	937	N	Unclassified
1663	KV	KCNH2	Q12809	S	960	N	Unclassified
1664	KV	KCNH2	Q12809	S	981	G	Unclassified
1665	KV	KCNH2	Q12809	T	1054	I	Unclassified
1666	KV	KCNH2	Q12809	T	1062	I	Unclassified
1667	KV	KCNH2	Q12809	T	1072	M	Unclassified
1668	KV	KCNH2	Q12809	T	1083	A	Unclassified
1669	KV	KCNH2	Q12809	T	1102	I	Unclassified
1670	KV	KCNH2	Q12809	T	1146	S	Unclassified
1671	KV	KCNH2	Q12809	T	152	S	Unclassified
1672	KV	KCNH2	Q12809	T	201	M	Unclassified
1673	KV	KCNH2	Q12809	T	216	I	Unclassified
1674	KV	KCNH2	Q12809	T	367	S	Unclassified
1675	KV	KCNH2	Q12809	T	421	K	Pathogenic
1676	KV	KCNH2	Q12809	T	421	M	Unclassified
1677	KV	KCNH2	Q12809	T	436	M	Unclassified
1678	KV	KCNH2	Q12809	T	473	N	Unclassified
1679	KV	KCNH2	Q12809	T	473	P	Unclassified
1680	KV	KCNH2	Q12809	T	474	I	Pathogenic
1681	KV	KCNH2	Q12809	T	613	M	Pathogenic
1682	KV	KCNH2	Q12809	T	613	S	Pathogenic
1683	KV	KCNH2	Q12809	T	618	I	Unclassified
1684	KV	KCNH2	Q12809	T	618	S	Unclassified
1685	KV	KCNH2	Q12809	T	623	I	Unclassified
1686	KV	KCNH2	Q12809	T	634	A	Pathogenic
1687	KV	KCNH2	Q12809	T	634	I	Unclassified
1688	KV	KCNH2	Q12809	T	65	P	Pathogenic
1689	KV	KCNH2	Q12809	T	65	S	Unclassified
1690	KV	KCNH2	Q12809	T	708	A	Unclassified
1691	KV	KCNH2	Q12809	T	74	M	Pathogenic
1692	KV	KCNH2	Q12809	T	74	P	Unclassified
1693	KV	KCNH2	Q12809	T	74	R	Pathogenic
1694	KV	KCNH2	Q12809	T	826	I	Pathogenic
1695	KV	KCNH2	Q12809	T	859	I	Unclassified
1696	KV	KCNH2	Q12809	T	875	M	Polymorphism
1697	KV	KCNH2	Q12809	T	895	M	Unclassified
1698	KV	KCNH2	Q12809	T	899	R	Unclassified
1699	KV	KCNH2	Q12809	T	983	I	Unclassified
1700	KV	KCNH2	Q12809	V	1038	L	Unclassified
1701	KV	KCNH2	Q12809	V	1038	M	Unclassified
1702	KV	KCNH2	Q12809	V	1097	I	Unclassified
1703	KV	KCNH2	Q12809	V	115	G	Pathogenic
1704	KV	KCNH2	Q12809	V	115	M	Unclassified
1705	KV	KCNH2	Q12809	V	215	G	Unclassified
1706	KV	KCNH2	Q12809	V	279	M	Unclassified
1707	KV	KCNH2	Q12809	V	325	M	Unclassified
1708	KV	KCNH2	Q12809	V	409	E	Unclassified
1709	KV	KCNH2	Q12809	V	409	M	Unclassified
1710	KV	KCNH2	Q12809	V	41	A	Unclassified
1711	KV	KCNH2	Q12809	V	41	F	Unclassified
1712	KV	KCNH2	Q12809	V	41	L	Pathogenic
1713	KV	KCNH2	Q12809	V	465	A	Unclassified
1714	KV	KCNH2	Q12809	V	476	I	Unclassified
1715	KV	KCNH2	Q12809	V	491	I	Unclassified
1716	KV	KCNH2	Q12809	V	533	G	Polymorphism
1717	KV	KCNH2	Q12809	V	535	L	Unclassified
1718	KV	KCNH2	Q12809	V	535	M	Unclassified
1719	KV	KCNH2	Q12809	V	612	L	Unclassified
1720	KV	KCNH2	Q12809	V	625	E	Unclassified
1721	KV	KCNH2	Q12809	V	630	A	Unclassified
1722	KV	KCNH2	Q12809	V	630	I	Pathogenic
1723	KV	KCNH2	Q12809	V	630	L	Unclassified
1724	KV	KCNH2	Q12809	V	644	F	Unclassified
1725	KV	KCNH2	Q12809	V	644	L	Unclassified
1726	KV	KCNH2	Q12809	V	770	A	Unclassified
1727	KV	KCNH2	Q12809	V	794	I	Unclassified
1728	KV	KCNH2	Q12809	V	796	G	Unclassified
1729	KV	KCNH2	Q12809	V	822	L	Pathogenic
1730	KV	KCNH2	Q12809	V	822	M	Pathogenic
1731	KV	KCNH2	Q12809	V	94	G	Unclassified
1732	KV	KCNH2	Q12809	W	410	S	Unclassified
1733	KV	KCNH2	Q12809	W	563	C	Unclassified
1734	KV	KCNH2	Q12809	W	563	G	Unclassified
1735	KV	KCNH2	Q12809	W	568	C	Unclassified
1736	KV	KCNH2	Q12809	W	568	R	Unclassified
1737	KV	KCNH2	Q12809	W	568	S	Unclassified
1738	KV	KCNH2	Q12809	W	585	C	Pathogenic
1739	KV	KCNH2	Q12809	W	585	C	Unclassified
1740	KV	KCNH2	Q12809	W	585	L	Pathogenic
1741	KV	KCNH2	Q12809	W	927	L	Unclassified
1742	KV	KCNH2	Q12809	Y	1078	C	Unclassified
1743	KV	KCNH2	Q12809	Y	327	C	Unclassified
1744	KV	KCNH2	Q12809	Y	420	C	Unclassified
1745	KV	KCNH2	Q12809	Y	427	C	Pathogenic
1746	KV	KCNH2	Q12809	Y	427	H	Unclassified
1747	KV	KCNH2	Q12809	Y	427	S	Pathogenic
1748	KV	KCNH2	Q12809	Y	43	C	Pathogenic
1749	KV	KCNH2	Q12809	Y	43	D	Unclassified
1750	KV	KCNH2	Q12809	Y	475	C	Unclassified
1751	KV	KCNH2	Q12809	Y	493	C	Pathogenic
1752	KV	KCNH2	Q12809	Y	493	F	Unclassified
1753	KV	KCNH2	Q12809	Y	493	S	Unclassified
1754	KV	KCNH2	Q12809	Y	54	H	Unclassified
1755	KV	KCNH2	Q12809	Y	569	H	Unclassified
1756	KV	KCNH2	Q12809	Y	597	C	Pathogenic
1757	KV	KCNH2	Q12809	Y	611	D	Pathogenic
1758	KV	KCNH2	Q12809	Y	611	H	Pathogenic
1759	KV	KCNH2	Q12809	Y	616	C	Pathogenic
1760	KV	KCNH2	Q12809	Y	99	C	Pathogenic
1761	KV	KCNH2	Q12809	Y	99	S	Unclassified
1762	KV	KCNH4	Q9UQ05	G	797	R	Unclassified
1763	KV	KCNH5	Q8NCM2	A	246	S	Unclassified
1764	KV	KCNH5	Q8NCM2	A	335	T	Unclassified
1765	KV	KCNH5	Q8NCM2	A	745	T	Polymorphism
1766	KV	KCNH5	Q8NCM2	A	878	T	Unclassified
1767	KV	KCNH5	Q8NCM2	D	791	G	Unclassified
1768	KV	KCNH5	Q8NCM2	D	984	V	Unclassified
1769	KV	KCNH5	Q8NCM2	E	772	G	Polymorphism
1770	KV	KCNH5	Q8NCM2	E	89	Q	Unclassified
1771	KV	KCNH5	Q8NCM2	G	789	C	Polymorphism
1772	KV	KCNH5	Q8NCM2	I	245	V	Unclassified
1773	KV	KCNH5	Q8NCM2	I	366	M	Polymorphism
1774	KV	KCNH5	Q8NCM2	I	616	N	Unclassified
1775	KV	KCNH5	Q8NCM2	I	938	V	Unclassified
1776	KV	KCNH5	Q8NCM2	K	945	E	Unclassified
1777	KV	KCNH5	Q8NCM2	L	553	S	Unclassified
1778	KV	KCNH5	Q8NCM2	M	447	V	Unclassified
1779	KV	KCNH5	Q8NCM2	M	928	V	Unclassified
1780	KV	KCNH5	Q8NCM2	P	204	L	Unclassified
1781	KV	KCNH5	Q8NCM2	P	705	R	Unclassified
1782	KV	KCNH5	Q8NCM2	P	962	S	Unclassified
1783	KV	KCNH5	Q8NCM2	Q	964	E	Unclassified
1784	KV	KCNH5	Q8NCM2	Q	964	K	Unclassified
1785	KV	KCNH5	Q8NCM2	R	154	W	Unclassified
1786	KV	KCNH5	Q8NCM2	R	327	H	Unclassified
1787	KV	KCNH5	Q8NCM2	R	813	Q	Unclassified
1788	KV	KCNH5	Q8NCM2	S	449	L	Unclassified
1789	KV	KCNH5	Q8NCM2	S	699	G	Unclassified
1790	KV	KCNH5	Q8NCM2	S	699	R	Unclassified
1791	KV	KCNH5	Q8NCM2	S	746	P	Unclassified
1792	KV	KCNH5	Q8NCM2	S	943	L	Unclassified
1793	KV	KCNH5	Q8NCM2	T	167	M	Unclassified
1794	KV	KCNH5	Q8NCM2	T	770	N	Unclassified
1795	KV	KCNH5	Q8NCM2	V	184	I	Unclassified
1796	KV	KCNH5	Q8NCM2	V	256	I	Unclassified
1797	KV	KCNH5	Q8NCM2	V	263	I	Unclassified
1798	KV	KCNH6	Q9H252	G	165	R	Polymorphism
1799	KV	KCNH6	Q9H252	T	925	M	Polymorphism
1800	KV	KCNH7	Q9NS40	G	958	A	Polymorphism
1801	KV	KCNH7	Q9NS40	R	394	H	Unclassified
1802	KV	KCNH8	Q96L42	E	984	Q	Polymorphism
1803	KV	KCNH8	Q96L42	Q	893	R	Polymorphism
1804	KV	KCNQ1	P51787	A	10	D	Unclassified
1805	KV	KCNQ1	P51787	A	150	G	Unclassified
1806	KV	KCNQ1	P51787	A	178	P	Pathogenic
1807	KV	KCNQ1	P51787	A	178	T	Unclassified
1808	KV	KCNQ1	P51787	A	194	P	Unclassified
1809	KV	KCNQ1	P51787	A	2	G	Pathogenic
1810	KV	KCNQ1	P51787	A	2	V	Unclassified
1811	KV	KCNQ1	P51787	A	226	V	Unclassified
1812	KV	KCNQ1	P51787	A	283	G	Unclassified
1813	KV	KCNQ1	P51787	A	283	P	Unclassified
1814	KV	KCNQ1	P51787	A	287	E	Unclassified
1815	KV	KCNQ1	P51787	A	3	G	Unclassified
1816	KV	KCNQ1	P51787	A	300	E	Unclassified
1817	KV	KCNQ1	P51787	A	300	T	Unclassified
1818	KV	KCNQ1	P51787	A	302	E	Unclassified
1819	KV	KCNQ1	P51787	A	302	T	Unclassified
1820	KV	KCNQ1	P51787	A	302	V	Pathogenic
1821	KV	KCNQ1	P51787	A	329	T	Unclassified
1822	KV	KCNQ1	P51787	A	341	E	Pathogenic
1823	KV	KCNQ1	P51787	A	341	G	Pathogenic
1824	KV	KCNQ1	P51787	A	341	V	Pathogenic
1825	KV	KCNQ1	P51787	A	344	E	Pathogenic
1826	KV	KCNQ1	P51787	A	344	G	Pathogenic
1827	KV	KCNQ1	P51787	A	344	T	Pathogenic
1828	KV	KCNQ1	P51787	A	344	V	Pathogenic
1829	KV	KCNQ1	P51787	A	371	P	Unclassified
1830	KV	KCNQ1	P51787	A	371	T	Unclassified
1831	KV	KCNQ1	P51787	A	372	D	Unclassified
1832	KV	KCNQ1	P51787	A	399	G	Unclassified
1833	KV	KCNQ1	P51787	A	46	T	Unclassified
1834	KV	KCNQ1	P51787	A	486	P	Unclassified
1835	KV	KCNQ1	P51787	A	525	T	Pathogenic
1836	KV	KCNQ1	P51787	A	525	V	Unclassified
1837	KV	KCNQ1	P51787	A	590	P	Unclassified
1838	KV	KCNQ1	P51787	A	590	T	Pathogenic
1839	KV	KCNQ1	P51787	A	62	T	Polymorphism
1840	KV	KCNQ1	P51787	C	122	Y	Pathogenic
1841	KV	KCNQ1	P51787	C	136	F	Unclassified
1842	KV	KCNQ1	P51787	C	381	Y	Pathogenic
1843	KV	KCNQ1	P51787	C	642	W	Unclassified
1844	KV	KCNQ1	P51787	D	202	G	Pathogenic
1845	KV	KCNQ1	P51787	D	202	H	Unclassified
1846	KV	KCNQ1	P51787	D	202	N	Pathogenic
1847	KV	KCNQ1	P51787	D	242	N	Pathogenic
1848	KV	KCNQ1	P51787	D	242	Y	Pathogenic
1849	KV	KCNQ1	P51787	D	301	V	Pathogenic
1850	KV	KCNQ1	P51787	D	317	G	Unclassified
1851	KV	KCNQ1	P51787	D	317	N	Pathogenic
1852	KV	KCNQ1	P51787	D	317	Y	Unclassified
1853	KV	KCNQ1	P51787	D	428	G	Unclassified
1854	KV	KCNQ1	P51787	D	446	E	Unclassified
1855	KV	KCNQ1	P51787	D	446	N	Pathogenic
1856	KV	KCNQ1	P51787	D	488	E	Unclassified
1857	KV	KCNQ1	P51787	D	564	G	Pathogenic
1858	KV	KCNQ1	P51787	D	611	N	Unclassified
1859	KV	KCNQ1	P51787	D	611	Y	Unclassified
1860	KV	KCNQ1	P51787	D	673	N	Unclassified
1861	KV	KCNQ1	P51787	E	11	K	Unclassified
1862	KV	KCNQ1	P51787	E	115	G	Unclassified
1863	KV	KCNQ1	P51787	E	115	K	Pathogenic
1864	KV	KCNQ1	P51787	E	146	G	Pathogenic
1865	KV	KCNQ1	P51787	E	146	K	Unclassified
1866	KV	KCNQ1	P51787	E	160	K	Unclassified
1867	KV	KCNQ1	P51787	E	160	V	Unclassified
1868	KV	KCNQ1	P51787	E	261	D	Unclassified
1869	KV	KCNQ1	P51787	E	261	K	Unclassified
1870	KV	KCNQ1	P51787	E	261	Q	Pathogenic
1871	KV	KCNQ1	P51787	E	284	K	Unclassified
1872	KV	KCNQ1	P51787	E	290	K	Unclassified
1873	KV	KCNQ1	P51787	E	385	K	Unclassified
1874	KV	KCNQ1	P51787	E	450	G	Unclassified
1875	KV	KCNQ1	P51787	E	543	K	Unclassified
1876	KV	KCNQ1	P51787	E	578	K	Unclassified
1877	KV	KCNQ1	P51787	E	596	G	Pathogenic
1878	KV	KCNQ1	P51787	E	596	K	Unclassified
1879	KV	KCNQ1	P51787	F	127	L	Unclassified
1880	KV	KCNQ1	P51787	F	157	C	Unclassified
1881	KV	KCNQ1	P51787	F	193	L	Unclassified
1882	KV	KCNQ1	P51787	F	275	S	Unclassified
1883	KV	KCNQ1	P51787	F	279	I	Pathogenic
1884	KV	KCNQ1	P51787	F	296	S	Unclassified
1885	KV	KCNQ1	P51787	F	335	L	Unclassified
1886	KV	KCNQ1	P51787	F	339	S	Pathogenic
1887	KV	KCNQ1	P51787	F	339	Y	Unclassified
1888	KV	KCNQ1	P51787	F	351	L	Pathogenic
1889	KV	KCNQ1	P51787	F	351	S	Unclassified
1890	KV	KCNQ1	P51787	F	573	L	Unclassified
1891	KV	KCNQ1	P51787	G	119	D	Unclassified
1892	KV	KCNQ1	P51787	G	119	R	Unclassified
1893	KV	KCNQ1	P51787	G	168	R	Pathogenic
1894	KV	KCNQ1	P51787	G	179	A	Pathogenic
1895	KV	KCNQ1	P51787	G	179	S	Unclassified
1896	KV	KCNQ1	P51787	G	186	C	Pathogenic
1897	KV	KCNQ1	P51787	G	186	D	Pathogenic
1898	KV	KCNQ1	P51787	G	186	R	Unclassified
1899	KV	KCNQ1	P51787	G	186	S	Unclassified
1900	KV	KCNQ1	P51787	G	186	V	Pathogenic
1901	KV	KCNQ1	P51787	G	189	E	Unclassified
1902	KV	KCNQ1	P51787	G	189	R	Pathogenic
1903	KV	KCNQ1	P51787	G	189	R	Unclassified
1904	KV	KCNQ1	P51787	G	216	R	Pathogenic
1905	KV	KCNQ1	P51787	G	22	R	Unclassified
1906	KV	KCNQ1	P51787	G	229	D	Pathogenic
1907	KV	KCNQ1	P51787	G	269	D	Pathogenic
1908	KV	KCNQ1	P51787	G	269	R	Pathogenic
1909	KV	KCNQ1	P51787	G	269	S	Pathogenic
1910	KV	KCNQ1	P51787	G	269	V	Pathogenic
1911	KV	KCNQ1	P51787	G	272	D	Pathogenic
1912	KV	KCNQ1	P51787	G	272	V	Unclassified
1913	KV	KCNQ1	P51787	G	292	D	Unclassified
1914	KV	KCNQ1	P51787	G	297	S	Unclassified
1915	KV	KCNQ1	P51787	G	306	R	Pathogenic
1916	KV	KCNQ1	P51787	G	306	R	Unclassified
1917	KV	KCNQ1	P51787	G	306	V	Unclassified
1918	KV	KCNQ1	P51787	G	314	A	Unclassified
1919	KV	KCNQ1	P51787	G	314	C	Unclassified
1920	KV	KCNQ1	P51787	G	314	D	Unclassified
1921	KV	KCNQ1	P51787	G	314	R	Pathogenic
1922	KV	KCNQ1	P51787	G	314	S	Pathogenic
1923	KV	KCNQ1	P51787	G	316	E	Unclassified
1924	KV	KCNQ1	P51787	G	316	R	Pathogenic
1925	KV	KCNQ1	P51787	G	316	R	Unclassified
1926	KV	KCNQ1	P51787	G	316	V	Unclassified
1927	KV	KCNQ1	P51787	G	316	W	Pathogenic
1928	KV	KCNQ1	P51787	G	325	E	Pathogenic
1929	KV	KCNQ1	P51787	G	325	R	Pathogenic
1930	KV	KCNQ1	P51787	G	345	E	Pathogenic
1931	KV	KCNQ1	P51787	G	345	R	Pathogenic
1932	KV	KCNQ1	P51787	G	350	R	Unclassified
1933	KV	KCNQ1	P51787	G	350	V	Pathogenic
1934	KV	KCNQ1	P51787	G	460	S	Unclassified
1935	KV	KCNQ1	P51787	G	548	D	Unclassified
1936	KV	KCNQ1	P51787	G	568	A	Pathogenic
1937	KV	KCNQ1	P51787	G	568	R	Pathogenic
1938	KV	KCNQ1	P51787	G	57	V	Unclassified
1939	KV	KCNQ1	P51787	G	584	S	Unclassified
1940	KV	KCNQ1	P51787	G	589	D	Pathogenic
1941	KV	KCNQ1	P51787	G	621	S	Unclassified
1942	KV	KCNQ1	P51787	G	626	S	Unclassified
1943	KV	KCNQ1	P51787	G	629	S	Unclassified
1944	KV	KCNQ1	P51787	G	635	R	Unclassified
1945	KV	KCNQ1	P51787	G	643	S	Polymorphism
1946	KV	KCNQ1	P51787	H	105	L	Unclassified
1947	KV	KCNQ1	P51787	H	126	L	Unclassified
1948	KV	KCNQ1	P51787	H	258	N	Unclassified
1949	KV	KCNQ1	P51787	H	258	P	Unclassified
1950	KV	KCNQ1	P51787	H	258	R	Pathogenic
1951	KV	KCNQ1	P51787	H	363	N	Pathogenic
1952	KV	KCNQ1	P51787	H	455	Y	Unclassified
1953	KV	KCNQ1	P51787	I	132	L	Unclassified
1954	KV	KCNQ1	P51787	I	198	V	Pathogenic
1955	KV	KCNQ1	P51787	I	204	F	Unclassified
1956	KV	KCNQ1	P51787	I	204	M	Pathogenic
1957	KV	KCNQ1	P51787	I	227	L	Pathogenic
1958	KV	KCNQ1	P51787	I	235	N	Pathogenic
1959	KV	KCNQ1	P51787	I	268	S	Unclassified
1960	KV	KCNQ1	P51787	I	268	V	Unclassified
1961	KV	KCNQ1	P51787	I	274	V	Unclassified
1962	KV	KCNQ1	P51787	I	313	M	Unclassified
1963	KV	KCNQ1	P51787	I	337	F	Pathogenic
1964	KV	KCNQ1	P51787	I	337	M	Unclassified
1965	KV	KCNQ1	P51787	I	375	F	Pathogenic
1966	KV	KCNQ1	P51787	I	514	T	Unclassified
1967	KV	KCNQ1	P51787	I	517	T	Unclassified
1968	KV	KCNQ1	P51787	I	567	S	Unclassified
1969	KV	KCNQ1	P51787	I	567	T	Pathogenic
1970	KV	KCNQ1	P51787	I	588	F	Pathogenic
1971	KV	KCNQ1	P51787	I	588	T	Pathogenic
1972	KV	KCNQ1	P51787	K	13	R	Unclassified
1973	KV	KCNQ1	P51787	K	183	R	Unclassified
1974	KV	KCNQ1	P51787	K	196	T	Unclassified
1975	KV	KCNQ1	P51787	K	218	E	Unclassified
1976	KV	KCNQ1	P51787	K	318	N	Pathogenic
1977	KV	KCNQ1	P51787	K	318	T	Unclassified
1978	KV	KCNQ1	P51787	K	354	R	Unclassified
1979	KV	KCNQ1	P51787	K	362	R	Pathogenic
1980	KV	KCNQ1	P51787	K	393	M	Unclassified
1981	KV	KCNQ1	P51787	K	393	N	Unclassified
1982	KV	KCNQ1	P51787	K	398	R	Unclassified
1983	KV	KCNQ1	P51787	K	422	T	Unclassified
1984	KV	KCNQ1	P51787	K	515	N	Pathogenic
1985	KV	KCNQ1	P51787	K	526	E	Unclassified
1986	KV	KCNQ1	P51787	K	526	N	Unclassified
1987	KV	KCNQ1	P51787	K	557	E	Pathogenic
1988	KV	KCNQ1	P51787	K	569	E	Unclassified
1989	KV	KCNQ1	P51787	K	598	R	Unclassified
1990	KV	KCNQ1	P51787	L	114	P	Unclassified
1991	KV	KCNQ1	P51787	L	131	P	Unclassified
1992	KV	KCNQ1	P51787	L	134	P	Pathogenic
1993	KV	KCNQ1	P51787	L	137	F	Pathogenic
1994	KV	KCNQ1	P51787	L	175	F	Unclassified
1995	KV	KCNQ1	P51787	L	187	P	Unclassified
1996	KV	KCNQ1	P51787	L	191	P	Unclassified
1997	KV	KCNQ1	P51787	L	203	P	Pathogenic
[truncated: 3,314 more rows]

## Sheet: UniProt
Table S3 (B): Data set of missense SNPs located on KVs (669 SNPs), CaVs (188 SNPs) and NaVs (1128 SNPs) as isolated from UniProt. This excel sheet "UniProt" contains all SNPs isolated from UniProtKB (1985 SNPs). The excel sheet named "Full" contains a data set of unique SNPs from both databases and the excel sheet "ClinVar" contains SNPs isolated from ClinVar (more details regarding the assembly …
UniProt Data set
#	Channel Type	Gene Name	AC	AA Before	Position	AA After	Status
1	CaV	CACNA1A	O00555	A	1507	S	Disease
2	CaV	CACNA1A	O00555	A	21	V	Polymorphism
3	CaV	CACNA1A	O00555	A	405	T	Disease
4	CaV	CACNA1A	O00555	A	453	T	Polymorphism
5	CaV	CACNA1A	O00555	A	712	T	Disease
6	CaV	CACNA1A	O00555	C	1868	R	Disease
7	CaV	CACNA1A	O00555	C	256	R	Disease
8	CaV	CACNA1A	O00555	C	287	Y	Disease
9	CaV	CACNA1A	O00555	D	1337	Y	Disease
10	CaV	CACNA1A	O00555	D	714	E	Disease
11	CaV	CACNA1A	O00555	E	101	Q	Disease
12	CaV	CACNA1A	O00555	E	1014	K	Polymorphism
13	CaV	CACNA1A	O00555	E	1755	K	Disease
14	CaV	CACNA1A	O00555	E	388	K	Disease
15	CaV	CACNA1A	O00555	E	731	A	Polymorphism
16	CaV	CACNA1A	O00555	E	917	D	Polymorphism
17	CaV	CACNA1A	O00555	E	992	V	Polymorphism
18	CaV	CACNA1A	O00555	F	1402	C	Disease
19	CaV	CACNA1A	O00555	F	1489	S	Disease
20	CaV	CACNA1A	O00555	G	1104	S	Polymorphism
21	CaV	CACNA1A	O00555	G	1481	R	Disease
22	CaV	CACNA1A	O00555	G	293	R	Disease
23	CaV	CACNA1A	O00555	G	637	D	Disease
24	CaV	CACNA1A	O00555	H	1735	L	Disease
25	CaV	CACNA1A	O00555	H	253	Y	Disease
26	CaV	CACNA1A	O00555	I	1809	L	Disease
27	CaV	CACNA1A	O00555	K	1334	E	Disease
28	CaV	CACNA1A	O00555	L	389	F	Disease
29	CaV	CACNA1A	O00555	M	797	T	Disease
30	CaV	CACNA1A	O00555	P	1172	L	Polymorphism
31	CaV	CACNA1A	O00555	P	2395	S	Polymorphism
32	CaV	CACNA1A	O00555	P	896	R	Disease
33	CaV	CACNA1A	O00555	P	913	S	Polymorphism
34	CaV	CACNA1A	O00555	R	1345	Q	Disease
35	CaV	CACNA1A	O00555	R	1660	H	Disease
36	CaV	CACNA1A	O00555	R	1663	Q	Disease
37	CaV	CACNA1A	O00555	R	1666	W	Disease
38	CaV	CACNA1A	O00555	R	1672	P	Unclassified
39	CaV	CACNA1A	O00555	R	1678	C	Disease
40	CaV	CACNA1A	O00555	R	192	Q	Disease
41	CaV	CACNA1A	O00555	R	195	K	Disease
42	CaV	CACNA1A	O00555	R	2134	C	Disease
43	CaV	CACNA1A	O00555	R	582	Q	Disease
44	CaV	CACNA1A	O00555	S	218	L	Disease
45	CaV	CACNA1A	O00555	T	500	M	Disease
46	CaV	CACNA1A	O00555	T	665	M	Disease
47	CaV	CACNA1A	O00555	V	1455	L	Disease
48	CaV	CACNA1A	O00555	V	1492	I	Disease
49	CaV	CACNA1A	O00555	V	1694	I	Disease
50	CaV	CACNA1A	O00555	V	713	A	Disease
51	CaV	CACNA1A	O00555	W	1435	R	Disease
52	CaV	CACNA1A	O00555	W	1682	R	Disease
53	CaV	CACNA1A	O00555	Y	1383	C	Disease
54	CaV	CACNA1A	O00555	Y	248	C	Disease
55	CaV	CACNA1B	Q00975	A	862	S	Polymorphism
56	CaV	CACNA1B	Q00975	E	1436	K	Polymorphism
57	CaV	CACNA1B	Q00975	E	1500	K	Polymorphism
58	CaV	CACNA1B	Q00975	N	167	K	Polymorphism
59	CaV	CACNA1B	Q00975	R	1389	H	Disease
60	CaV	CACNA1B	Q00975	T	996	A	Polymorphism
61	CaV	CACNA1C	Q13936	A	1365	T	Polymorphism
62	CaV	CACNA1C	Q13936	A	1765	G	Polymorphism
63	CaV	CACNA1C	Q13936	A	2091	S	Unclassified
64	CaV	CACNA1C	Q13936	A	2122	G	Polymorphism
65	CaV	CACNA1C	Q13936	A	2169	T	Polymorphism
66	CaV	CACNA1C	Q13936	A	28	T	Unclassified
67	CaV	CACNA1C	Q13936	A	39	V	Unclassified
68	CaV	CACNA1C	Q13936	A	582	D	Disease
69	CaV	CACNA1C	Q13936	A	752	T	Polymorphism
70	CaV	CACNA1C	Q13936	D	1787	N	Polymorphism
71	CaV	CACNA1C	Q13936	E	1544	K	Disease
72	CaV	CACNA1C	Q13936	E	1948	K	Polymorphism
73	CaV	CACNA1C	Q13936	E	477	K	Polymorphism
74	CaV	CACNA1C	Q13936	G	1831	C	Unclassified
75	CaV	CACNA1C	Q13936	G	1843	A	Polymorphism
76	CaV	CACNA1C	Q13936	G	37	R	Polymorphism
77	CaV	CACNA1C	Q13936	G	402	S	Disease
78	CaV	CACNA1C	Q13936	G	406	R	Disease
79	CaV	CACNA1C	Q13936	G	490	R	Unclassified
80	CaV	CACNA1C	Q13936	I	1186	T	Disease
81	CaV	CACNA1C	Q13936	I	1186	V	Disease
82	CaV	CACNA1C	Q13936	I	1523	M	Disease
83	CaV	CACNA1C	Q13936	I	304	T	Polymorphism
84	CaV	CACNA1C	Q13936	I	391	L	Polymorphism
85	CaV	CACNA1C	Q13936	K	1893	R	Polymorphism
86	CaV	CACNA1C	Q13936	M	1869	V	Polymorphism
87	CaV	CACNA1C	Q13936	M	456	I	Unclassified
88	CaV	CACNA1C	Q13936	N	2174	S	Polymorphism
89	CaV	CACNA1C	Q13936	P	1868	L	Polymorphism
90	CaV	CACNA1C	Q13936	P	381	S	Unclassified
91	CaV	CACNA1C	Q13936	P	817	S	Polymorphism
92	CaV	CACNA1C	Q13936	Q	84	R	Polymorphism
93	CaV	CACNA1C	Q13936	R	1159	H	Unclassified
94	CaV	CACNA1C	Q13936	R	1972	C	Polymorphism
95	CaV	CACNA1C	Q13936	R	2056	Q	Polymorphism
96	CaV	CACNA1C	Q13936	R	518	C	Disease
97	CaV	CACNA1C	Q13936	R	518	H	Disease
98	CaV	CACNA1C	Q13936	R	858	H	Disease
99	CaV	CACNA1C	Q13936	R	860	G	Disease
100	CaV	CACNA1C	Q13936	S	878	R	Unclassified
101	CaV	CACNA1C	Q13936	T	1800	I	Unclassified
102	CaV	CACNA1C	Q13936	T	1835	M	Polymorphism
103	CaV	CACNA1C	Q13936	T	1953	M	Unclassified
104	CaV	CACNA1C	Q13936	T	2081	N	Polymorphism
105	CaV	CACNA1C	Q13936	V	1755	I	Polymorphism
106	CaV	CACNA1C	Q13936	V	2097	I	Unclassified
107	CaV	CACNA1D	Q01668	A	749	G	Disease
108	CaV	CACNA1D	Q01668	D	2097	N	Polymorphism
109	CaV	CACNA1D	Q01668	G	403	D	Disease
110	CaV	CACNA1D	Q01668	G	407	R	Disease
111	CaV	CACNA1D	Q01668	I	750	M	Disease
112	CaV	CACNA1D	Q01668	V	401	L	Disease
113	CaV	CACNA1E	Q15878	A	1955	T	Polymorphism
114	CaV	CACNA1E	Q15878	D	859	E	Polymorphism
115	CaV	CACNA1F	O60840	A	1259	T	Polymorphism
116	CaV	CACNA1F	O60840	A	1270	T	Polymorphism
117	CaV	CACNA1F	O60840	A	928	D	Disease
118	CaV	CACNA1F	O60840	C	1499	R	Disease
119	CaV	CACNA1F	O60840	C	74	R	Disease
120	CaV	CACNA1F	O60840	F	753	C	Disease
121	CaV	CACNA1F	O60840	G	1018	R	Disease
122	CaV	CACNA1F	O60840	G	150	R	Disease
123	CaV	CACNA1F	O60840	G	261	R	Disease
124	CaV	CACNA1F	O60840	G	369	D	Disease
125	CaV	CACNA1F	O60840	G	603	R	Disease
126	CaV	CACNA1F	O60840	G	674	D	Disease
127	CaV	CACNA1F	O60840	I	756	T	Disease
128	CaV	CACNA1F	O60840	L	1079	P	Disease
129	CaV	CACNA1F	O60840	L	1375	H	Disease
130	CaV	CACNA1F	O60840	L	1508	P	Disease
131	CaV	CACNA1F	O60840	L	860	P	Disease
132	CaV	CACNA1F	O60840	N	746	T	Polymorphism
133	CaV	CACNA1F	O60840	P	14	L	Polymorphism
134	CaV	CACNA1F	O60840	P	1500	R	Disease
135	CaV	CACNA1F	O60840	R	1060	W	Disease
136	CaV	CACNA1F	O60840	R	1930	H	Polymorphism
137	CaV	CACNA1F	O60840	R	519	Q	Disease
138	CaV	CACNA1F	O60840	S	229	P	Disease
139	CaV	CACNA1F	O60840	V	635	I	Disease
140	CaV	CACNA1G	O43497	R	1715	H	Disease
141	CaV	CACNA1H	O95180	A	748	V	Disease
142	CaV	CACNA1H	O95180	C	456	S	Disease
143	CaV	CACNA1H	O95180	D	1463	N	Disease
144	CaV	CACNA1H	O95180	E	1974	G	Polymorphism
145	CaV	CACNA1H	O95180	E	282	K	Disease
146	CaV	CACNA1H	O95180	F	161	L	Disease
147	CaV	CACNA1H	O95180	G	499	S	Disease
148	CaV	CACNA1H	O95180	G	755	D	Disease
149	CaV	CACNA1H	O95180	G	773	D	Disease
150	CaV	CACNA1H	O95180	G	784	S	Disease
151	CaV	CACNA1H	O95180	G	848	S	Disease
152	CaV	CACNA1H	O95180	H	516	Y	Unclassified
153	CaV	CACNA1H	O95180	M	1549	I	Disease
154	CaV	CACNA1H	O95180	M	1549	V	Disease
155	CaV	CACNA1H	O95180	M	313	V	Polymorphism
156	CaV	CACNA1H	O95180	P	2083	L	Disease
157	CaV	CACNA1H	O95180	P	2173	S	Polymorphism
158	CaV	CACNA1H	O95180	P	618	L	Disease
159	CaV	CACNA1H	O95180	P	640	L	Polymorphism
160	CaV	CACNA1H	O95180	P	648	L	Disease
161	CaV	CACNA1H	O95180	P	684	S	Polymorphism
162	CaV	CACNA1H	O95180	R	1871	Q	Polymorphism
163	CaV	CACNA1H	O95180	R	2060	H	Polymorphism
164	CaV	CACNA1H	O95180	R	2077	H	Polymorphism
165	CaV	CACNA1H	O95180	R	744	Q	Disease
166	CaV	CACNA1H	O95180	R	788	C	Polymorphism
167	CaV	CACNA1H	O95180	S	196	L	Disease
168	CaV	CACNA1H	O95180	S	1970	C	Unclassified
169	CaV	CACNA1H	O95180	V	1951	E	Disease
170	CaV	CACNA1H	O95180	V	664	A	Polymorphism
171	CaV	CACNA1H	O95180	V	812	M	Polymorphism
172	CaV	CACNA1H	O95180	V	831	M	Disease
173	CaV	CACNA1I	Q9P0X4	G	1782	A	Polymorphism
174	CaV	CACNA1I	Q9P0X4	G	1782	R	Polymorphism
175	CaV	CACNA1I	Q9P0X4	I	1040	V	Polymorphism
176	CaV	CACNA1I	Q9P0X4	T	1513	M	Polymorphism
177	CaV	CACNA1S	Q13698	A	69	G	Polymorphism
178	CaV	CACNA1S	Q13698	E	1840	D	Polymorphism
179	CaV	CACNA1S	Q13698	L	1800	S	Polymorphism
180	CaV	CACNA1S	Q13698	L	458	H	Polymorphism
181	CaV	CACNA1S	Q13698	R	1086	H	Disease
182	CaV	CACNA1S	Q13698	R	1239	G	Disease
183	CaV	CACNA1S	Q13698	R	1239	H	Disease
184	CaV	CACNA1S	Q13698	R	1539	C	Polymorphism
185	CaV	CACNA1S	Q13698	R	1658	H	Polymorphism
186	CaV	CACNA1S	Q13698	R	528	G	Disease
187	CaV	CACNA1S	Q13698	R	528	H	Disease
188	CaV	CACNA1S	Q13698	R	900	S	Disease
189	KV	KCNA1	Q09470	A	242	P	Disease
190	KV	KCNA1	Q09470	E	325	D	Disease
191	KV	KCNA1	Q09470	F	184	C	Disease
192	KV	KCNA1	Q09470	F	249	I	Disease
193	KV	KCNA1	Q09470	I	177	R	Disease
194	KV	KCNA1	Q09470	I	400	V	Unclassified
195	KV	KCNA1	Q09470	L	329	I	Disease
196	KV	KCNA1	Q09470	N	255	D	Disease
197	KV	KCNA1	Q09470	P	244	H	Disease
198	KV	KCNA1	Q09470	P	405	L	Disease
199	KV	KCNA1	Q09470	R	204	H	Polymorphism
200	KV	KCNA1	Q09470	R	239	S	Disease
201	KV	KCNA1	Q09470	S	342	I	Disease
202	KV	KCNA1	Q09470	T	226	A	Disease
203	KV	KCNA1	Q09470	T	226	K	Disease
204	KV	KCNA1	Q09470	T	226	M	Disease
205	KV	KCNA1	Q09470	T	226	R	Disease
206	KV	KCNA1	Q09470	V	174	F	Disease
207	KV	KCNA1	Q09470	V	404	I	Disease
208	KV	KCNA1	Q09470	V	408	A	Disease
209	KV	KCNA10	Q16322	R	200	H	Unclassified
210	KV	KCNA10	Q16322	S	258	N	Polymorphism
211	KV	KCNA10	Q16322	V	220	M	Polymorphism
212	KV	KCNA2	P16389	I	263	T	Disease
213	KV	KCNA2	P16389	L	298	F	Disease
214	KV	KCNA2	P16389	P	405	L	Disease
215	KV	KCNA2	P16389	R	297	Q	Disease
216	KV	KCNA2	P16389	S	324	T	Disease
217	KV	KCNA5	P22460	G	300	S	Unclassified
218	KV	KCNA5	P22460	L	42	H	Unclassified
219	KV	KCNA5	P22460	L	85	M	Polymorphism
220	KV	KCNA5	P22460	P	170	R	Unclassified
221	KV	KCNA5	P22460	P	228	S	Polymorphism
222	KV	KCNA5	P22460	R	184	P	Unclassified
223	KV	KCNA5	P22460	R	578	K	Polymorphism
224	KV	KCNA5	P22460	T	114	P	Unclassified
225	KV	KCNA7	Q96RP8	M	418	T	Polymorphism
226	KV	KCNA7	Q96RP8	P	189	R	Polymorphism
227	KV	KCNB1	Q14721	G	379	R	Disease
228	KV	KCNB1	Q14721	G	401	R	Disease
229	KV	KCNB1	Q14721	P	825	S	Polymorphism
230	KV	KCNB1	Q14721	R	306	C	Disease
231	KV	KCNB1	Q14721	S	347	R	Disease
232	KV	KCNB1	Q14721	S	857	N	Polymorphism
233	KV	KCNB1	Q14721	T	374	I	Disease
234	KV	KCNB1	Q14721	T	616	N	Polymorphism
235	KV	KCNB1	Q14721	T	616	S	Polymorphism
236	KV	KCNB1	Q14721	V	378	A	Disease
237	KV	KCNB2	Q92953	E	657	G	Polymorphism
238	KV	KCNB2	Q92953	V	450	I	Unclassified
239	KV	KCNC1	P48547	R	320	H	Disease
240	KV	KCNC3	Q14003	D	129	N	Unclassified
241	KV	KCNC3	Q14003	D	477	N	Unclassified
242	KV	KCNC3	Q14003	D	63	G	Polymorphism
243	KV	KCNC3	Q14003	D	746	N	Unclassified
244	KV	KCNC3	Q14003	F	448	L	Disease
245	KV	KCNC3	Q14003	G	263	D	Polymorphism
246	KV	KCNC3	Q14003	G	643	S	Unclassified
247	KV	KCNC3	Q14003	P	645	R	Unclassified
248	KV	KCNC3	Q14003	Q	41	H	Polymorphism
249	KV	KCNC3	Q14003	R	366	H	Unclassified
250	KV	KCNC3	Q14003	R	420	H	Disease
251	KV	KCNC3	Q14003	R	423	H	Disease
252	KV	KCNC3	Q14003	S	591	G	Unclassified
253	KV	KCNC3	Q14003	V	535	M	Disease
254	KV	KCNC4	Q03721	C	520	Y	Polymorphism
255	KV	KCNC4	Q03721	D	318	Y	Polymorphism
256	KV	KCNC4	Q03721	R	516	Q	Polymorphism
257	KV	KCND2	Q9NZV8	V	404	M	Disease
258	KV	KCND3	Q9UK17	G	345	V	Disease
259	KV	KCND3	Q9UK17	G	384	S	Disease
260	KV	KCND3	Q9UK17	G	600	R	Unclassified
261	KV	KCND3	Q9UK17	L	450	F	Unclassified
262	KV	KCND3	Q9UK17	M	373	I	Unclassified
263	KV	KCND3	Q9UK17	S	390	N	Unclassified
264	KV	KCND3	Q9UK17	S	530	R	Unclassified
265	KV	KCND3	Q9UK17	T	352	P	Disease
266	KV	KCND3	Q9UK17	T	377	M	Disease
267	KV	KCND3	Q9UK17	V	338	E	Disease
268	KV	KCND3	Q9UK17	V	392	I	Unclassified
269	KV	KCND3	Q9UK17	V	94	M	Unclassified
270	KV	KCNG1	Q9UIX4	I	304	M	Polymorphism
271	KV	KCNG4	Q8TDN1	C	255	Y	Polymorphism
272	KV	KCNG4	Q8TDN1	E	321	K	Polymorphism
273	KV	KCNG4	Q8TDN1	G	325	R	Polymorphism
274	KV	KCNG4	Q8TDN1	G	8	W	Polymorphism
275	KV	KCNG4	Q8TDN1	R	206	W	Polymorphism
276	KV	KCNG4	Q8TDN1	R	427	H	Polymorphism
277	KV	KCNH1	O95259	G	375	R	Disease
278	KV	KCNH1	O95259	G	496	R	Disease
279	KV	KCNH1	O95259	I	494	V	Disease
280	KV	KCNH1	O95259	K	217	N	Disease
281	KV	KCNH1	O95259	L	379	V	Disease
282	KV	KCNH1	O95259	L	489	F	Disease
283	KV	KCNH1	O95259	Q	503	R	Disease
284	KV	KCNH1	O95259	S	352	Y	Disease
285	KV	KCNH1	O95259	V	383	L	Disease
286	KV	KCNH2	Q12809	A	277	D	Unclassified
287	KV	KCNH2	Q12809	A	32	T	Unclassified
288	KV	KCNH2	Q12809	A	422	T	Disease
289	KV	KCNH2	Q12809	A	490	T	Disease
290	KV	KCNH2	Q12809	A	558	E	Unclassified
291	KV	KCNH2	Q12809	A	558	P	Disease
292	KV	KCNH2	Q12809	A	561	T	Disease
293	KV	KCNH2	Q12809	A	561	V	Disease
294	KV	KCNH2	Q12809	A	565	T	Unclassified
295	KV	KCNH2	Q12809	A	57	P	Unclassified
296	KV	KCNH2	Q12809	A	614	V	Disease
297	KV	KCNH2	Q12809	A	78	P	Disease
298	KV	KCNH2	Q12809	A	85	V	Disease
299	KV	KCNH2	Q12809	A	913	V	Disease
300	KV	KCNH2	Q12809	C	108	R	Unclassified
301	KV	KCNH2	Q12809	C	49	Y	Unclassified
302	KV	KCNH2	Q12809	C	566	S	Unclassified
303	KV	KCNH2	Q12809	C	64	W	Unclassified
304	KV	KCNH2	Q12809	C	64	Y	Disease
305	KV	KCNH2	Q12809	C	66	G	Disease
306	KV	KCNH2	Q12809	D	102	A	Unclassified
307	KV	KCNH2	Q12809	D	16	A	Unclassified
308	KV	KCNH2	Q12809	D	259	N	Unclassified
309	KV	KCNH2	Q12809	D	323	N	Unclassified
310	KV	KCNH2	Q12809	D	456	Y	Disease
311	KV	KCNH2	Q12809	D	460	Y	Unclassified
312	KV	KCNH2	Q12809	D	466	Y	Unclassified
313	KV	KCNH2	Q12809	D	501	H	Unclassified
314	KV	KCNH2	Q12809	D	501	N	Unclassified
315	KV	KCNH2	Q12809	D	609	G	Unclassified
316	KV	KCNH2	Q12809	D	609	H	Unclassified
317	KV	KCNH2	Q12809	D	609	N	Disease
318	KV	KCNH2	Q12809	D	767	Y	Unclassified
319	KV	KCNH2	Q12809	D	774	Y	Disease
320	KV	KCNH2	Q12809	D	837	G	Disease
321	KV	KCNH2	Q12809	D	837	Y	Unclassified
322	KV	KCNH2	Q12809	E	444	D	Disease
323	KV	KCNH2	Q12809	E	58	A	Unclassified
324	KV	KCNH2	Q12809	E	58	D	Unclassified
325	KV	KCNH2	Q12809	E	58	G	Unclassified
326	KV	KCNH2	Q12809	E	637	D	Disease
327	KV	KCNH2	Q12809	E	637	K	Disease
328	KV	KCNH2	Q12809	E	788	D	Disease
329	KV	KCNH2	Q12809	E	788	K	Unclassified
330	KV	KCNH2	Q12809	F	106	Y	Unclassified
331	KV	KCNH2	Q12809	F	125	C	Unclassified
332	KV	KCNH2	Q12809	F	29	L	Disease
333	KV	KCNH2	Q12809	F	431	L	Unclassified
334	KV	KCNH2	Q12809	F	627	L	Disease
335	KV	KCNH2	Q12809	F	640	L	Disease
336	KV	KCNH2	Q12809	F	640	V	Disease
337	KV	KCNH2	Q12809	F	656	C	Unclassified
338	KV	KCNH2	Q12809	F	68	L	Unclassified
339	KV	KCNH2	Q12809	F	805	C	Disease
340	KV	KCNH2	Q12809	F	805	S	Disease
341	KV	KCNH2	Q12809	G	1036	D	Disease
342	KV	KCNH2	Q12809	G	149	A	Unclassified
343	KV	KCNH2	Q12809	G	238	S	Disease
344	KV	KCNH2	Q12809	G	306	W	Disease
345	KV	KCNH2	Q12809	G	314	S	Unclassified
346	KV	KCNH2	Q12809	G	47	V	Disease
347	KV	KCNH2	Q12809	G	53	D	Unclassified
348	KV	KCNH2	Q12809	G	53	R	Disease
349	KV	KCNH2	Q12809	G	572	C	Disease
350	KV	KCNH2	Q12809	G	572	D	Disease
351	KV	KCNH2	Q12809	G	572	R	Disease
352	KV	KCNH2	Q12809	G	572	S	Disease
353	KV	KCNH2	Q12809	G	572	V	Unclassified
354	KV	KCNH2	Q12809	G	584	R	Unclassified
355	KV	KCNH2	Q12809	G	584	S	Disease
356	KV	KCNH2	Q12809	G	594	D	Unclassified
357	KV	KCNH2	Q12809	G	601	C	Unclassified
358	KV	KCNH2	Q12809	G	601	S	Disease
359	KV	KCNH2	Q12809	G	604	S	Disease
360	KV	KCNH2	Q12809	G	626	A	Unclassified
361	KV	KCNH2	Q12809	G	626	D	Unclassified
362	KV	KCNH2	Q12809	G	626	S	Disease
363	KV	KCNH2	Q12809	G	628	S	Disease
364	KV	KCNH2	Q12809	G	628	V	Disease
365	KV	KCNH2	Q12809	G	648	S	Unclassified
366	KV	KCNH2	Q12809	G	657	R	Unclassified
367	KV	KCNH2	Q12809	G	71	R	Unclassified
368	KV	KCNH2	Q12809	G	749	V	Unclassified
369	KV	KCNH2	Q12809	G	800	W	Unclassified
370	KV	KCNH2	Q12809	G	806	E	Unclassified
371	KV	KCNH2	Q12809	G	820	R	Disease
372	KV	KCNH2	Q12809	G	903	R	Unclassified
373	KV	KCNH2	Q12809	G	924	A	Unclassified
374	KV	KCNH2	Q12809	G	924	E	Unclassified
375	KV	KCNH2	Q12809	G	925	R	Disease
376	KV	KCNH2	Q12809	H	1153	Y	Unclassified
377	KV	KCNH2	Q12809	H	402	R	Unclassified
378	KV	KCNH2	Q12809	H	562	P	Disease
379	KV	KCNH2	Q12809	H	562	R	Unclassified
380	KV	KCNH2	Q12809	H	687	Y	Unclassified
381	KV	KCNH2	Q12809	H	70	N	Unclassified
382	KV	KCNH2	Q12809	H	70	R	Disease
383	KV	KCNH2	Q12809	I	30	T	Unclassified
384	KV	KCNH2	Q12809	I	31	S	Disease
385	KV	KCNH2	Q12809	I	571	L	Disease
386	KV	KCNH2	Q12809	I	571	V	Unclassified
387	KV	KCNH2	Q12809	I	593	K	Unclassified
388	KV	KCNH2	Q12809	I	593	R	Disease
389	KV	KCNH2	Q12809	I	593	T	Disease
390	KV	KCNH2	Q12809	I	662	T	Unclassified
391	KV	KCNH2	Q12809	I	711	V	Unclassified
392	KV	KCNH2	Q12809	I	728	F	Unclassified
393	KV	KCNH2	Q12809	K	525	N	Disease
394	KV	KCNH2	Q12809	K	638	E	Disease
395	KV	KCNH2	Q12809	K	638	N	Unclassified
396	KV	KCNH2	Q12809	K	757	N	Unclassified
397	KV	KCNH2	Q12809	K	897	T	Polymorphism
398	KV	KCNH2	Q12809	L	1049	P	Unclassified
399	KV	KCNH2	Q12809	L	1066	V	Unclassified
400	KV	KCNH2	Q12809	L	413	P	Disease
401	KV	KCNH2	Q12809	L	552	S	Disease
402	KV	KCNH2	Q12809	L	559	H	Disease
403	KV	KCNH2	Q12809	L	564	P	Disease
404	KV	KCNH2	Q12809	L	615	F	Unclassified
405	KV	KCNH2	Q12809	L	615	V	Disease
406	KV	KCNH2	Q12809	L	622	F	Disease
407	KV	KCNH2	Q12809	L	678	P	Unclassified
408	KV	KCNH2	Q12809	L	693	P	Unclassified
409	KV	KCNH2	Q12809	L	86	P	Unclassified
410	KV	KCNH2	Q12809	L	86	R	Disease
411	KV	KCNH2	Q12809	M	1115	V	Disease
412	KV	KCNH2	Q12809	M	218	V	Unclassified
413	KV	KCNH2	Q12809	M	291	T	Unclassified
414	KV	KCNH2	Q12809	M	645	I	Unclassified
415	KV	KCNH2	Q12809	M	645	L	Disease
416	KV	KCNH2	Q12809	N	33	T	Disease
417	KV	KCNH2	Q12809	N	45	Y	Unclassified
418	KV	KCNH2	Q12809	N	470	D	Disease
419	KV	KCNH2	Q12809	N	588	D	Disease
420	KV	KCNH2	Q12809	N	588	K	Disease
421	KV	KCNH2	Q12809	N	629	D	Disease
422	KV	KCNH2	Q12809	N	629	I	Unclassified
423	KV	KCNH2	Q12809	N	629	K	Disease
424	KV	KCNH2	Q12809	N	629	S	Disease
425	KV	KCNH2	Q12809	N	633	S	Disease
426	KV	KCNH2	Q12809	N	635	D	Unclassified
427	KV	KCNH2	Q12809	N	635	I	Disease
428	KV	KCNH2	Q12809	N	635	K	Unclassified
429	KV	KCNH2	Q12809	N	861	H	Unclassified
430	KV	KCNH2	Q12809	N	861	I	Disease
431	KV	KCNH2	Q12809	N	996	I	Disease
432	KV	KCNH2	Q12809	P	1016	L	Polymorphism
433	KV	KCNH2	Q12809	P	1016	S	Polymorphism
434	KV	KCNH2	Q12809	P	1020	S	Polymorphism
435	KV	KCNH2	Q12809	P	1026	L	Polymorphism
436	KV	KCNH2	Q12809	P	1093	L	Unclassified
437	KV	KCNH2	Q12809	P	114	S	Unclassified
438	KV	KCNH2	Q12809	P	141	L	Unclassified
439	KV	KCNH2	Q12809	P	251	S	Unclassified
440	KV	KCNH2	Q12809	P	347	S	Disease
441	KV	KCNH2	Q12809	P	426	H	Unclassified
442	KV	KCNH2	Q12809	P	440	L	Unclassified
443	KV	KCNH2	Q12809	P	451	L	Disease
444	KV	KCNH2	Q12809	P	596	H	Unclassified
445	KV	KCNH2	Q12809	P	596	L	Unclassified
446	KV	KCNH2	Q12809	P	596	R	Disease
447	KV	KCNH2	Q12809	P	605	L	Unclassified
448	KV	KCNH2	Q12809	P	605	S	Unclassified
449	KV	KCNH2	Q12809	P	632	S	Disease
450	KV	KCNH2	Q12809	P	72	L	Unclassified
451	KV	KCNH2	Q12809	P	72	Q	Unclassified
452	KV	KCNH2	Q12809	P	721	L	Disease
453	KV	KCNH2	Q12809	P	846	S	Unclassified
454	KV	KCNH2	Q12809	P	917	L	Disease
455	KV	KCNH2	Q12809	P	968	L	Unclassified
456	KV	KCNH2	Q12809	R	100	G	Disease
457	KV	KCNH2	Q12809	R	100	Q	Disease
458	KV	KCNH2	Q12809	R	100	W	Unclassified
459	KV	KCNH2	Q12809	R	1005	Q	Unclassified
460	KV	KCNH2	Q12809	R	1007	H	Unclassified
461	KV	KCNH2	Q12809	R	1033	W	Unclassified
462	KV	KCNH2	Q12809	R	1055	Q	Polymorphism
463	KV	KCNH2	Q12809	R	164	H	Unclassified
464	KV	KCNH2	Q12809	R	176	W	Disease
465	KV	KCNH2	Q12809	R	181	Q	Polymorphism
466	KV	KCNH2	Q12809	R	20	G	Unclassified
467	KV	KCNH2	Q12809	R	242	G	Unclassified
468	KV	KCNH2	Q12809	R	301	L	Unclassified
469	KV	KCNH2	Q12809	R	312	C	Unclassified
470	KV	KCNH2	Q12809	R	328	C	Disease
471	KV	KCNH2	Q12809	R	528	P	Disease
472	KV	KCNH2	Q12809	R	531	Q	Disease
473	KV	KCNH2	Q12809	R	531	W	Unclassified
474	KV	KCNH2	Q12809	R	534	C	Disease
475	KV	KCNH2	Q12809	R	534	L	Disease
476	KV	KCNH2	Q12809	R	56	Q	Disease
477	KV	KCNH2	Q12809	R	582	C	Disease
478	KV	KCNH2	Q12809	R	582	L	Unclassified
479	KV	KCNH2	Q12809	R	696	C	Disease
480	KV	KCNH2	Q12809	R	696	P	Unclassified
481	KV	KCNH2	Q12809	R	744	P	Disease
482	KV	KCNH2	Q12809	R	752	Q	Disease
483	KV	KCNH2	Q12809	R	752	W	Disease
484	KV	KCNH2	Q12809	R	784	W	Polymorphism
485	KV	KCNH2	Q12809	R	791	W	Unclassified
486	KV	KCNH2	Q12809	R	823	W	Unclassified
487	KV	KCNH2	Q12809	R	885	C	Unclassified
488	KV	KCNH2	Q12809	R	887	H	Disease
489	KV	KCNH2	Q12809	R	894	C	Unclassified
490	KV	KCNH2	Q12809	R	894	L	Unclassified
491	KV	KCNH2	Q12809	R	920	Q	Unclassified
492	KV	KCNH2	Q12809	R	920	W	Unclassified
493	KV	KCNH2	Q12809	R	922	Q	Unclassified
494	KV	KCNH2	Q12809	R	922	W	Disease
495	KV	KCNH2	Q12809	R	948	C	Disease
496	KV	KCNH2	Q12809	S	26	I	Disease
497	KV	KCNH2	Q12809	S	320	L	Disease
498	KV	KCNH2	Q12809	S	428	L	Unclassified
499	KV	KCNH2	Q12809	S	55	L	Disease
500	KV	KCNH2	Q12809	S	599	R	Unclassified
501	KV	KCNH2	Q12809	S	621	R	Unclassified
502	KV	KCNH2	Q12809	S	641	F	Disease
503	KV	KCNH2	Q12809	S	660	L	Disease
504	KV	KCNH2	Q12809	S	818	L	Disease
505	KV	KCNH2	Q12809	S	818	P	Unclassified
506	KV	KCNH2	Q12809	S	906	L	Unclassified
507	KV	KCNH2	Q12809	S	937	N	Unclassified
508	KV	KCNH2	Q12809	T	421	M	Disease
509	KV	KCNH2	Q12809	T	436	M	Disease
510	KV	KCNH2	Q12809	T	473	N	Unclassified
511	KV	KCNH2	Q12809	T	474	I	Disease
512	KV	KCNH2	Q12809	T	613	M	Disease
513	KV	KCNH2	Q12809	T	623	I	Disease
514	KV	KCNH2	Q12809	T	634	I	Unclassified
515	KV	KCNH2	Q12809	T	65	P	Disease
516	KV	KCNH2	Q12809	T	74	M	Disease
517	KV	KCNH2	Q12809	T	74	P	Unclassified
518	KV	KCNH2	Q12809	T	74	R	Unclassified
519	KV	KCNH2	Q12809	T	983	I	Disease
520	KV	KCNH2	Q12809	V	1038	M	Unclassified
521	KV	KCNH2	Q12809	V	41	F	Unclassified
522	KV	KCNH2	Q12809	V	476	I	Unclassified
523	KV	KCNH2	Q12809	V	612	L	Disease
524	KV	KCNH2	Q12809	V	630	A	Disease
525	KV	KCNH2	Q12809	V	630	L	Disease
526	KV	KCNH2	Q12809	V	644	F	Disease
527	KV	KCNH2	Q12809	V	644	L	Unclassified
528	KV	KCNH2	Q12809	V	770	A	Unclassified
529	KV	KCNH2	Q12809	V	822	M	Disease
530	KV	KCNH2	Q12809	V	94	G	Unclassified
531	KV	KCNH2	Q12809	W	410	S	Unclassified
532	KV	KCNH2	Q12809	W	568	R	Unclassified
533	KV	KCNH2	Q12809	W	585	C	Unclassified
534	KV	KCNH2	Q12809	Y	1078	C	Unclassified
535	KV	KCNH2	Q12809	Y	420	C	Disease
536	KV	KCNH2	Q12809	Y	427	C	Unclassified
537	KV	KCNH2	Q12809	Y	427	H	Disease
538	KV	KCNH2	Q12809	Y	427	S	Disease
539	KV	KCNH2	Q12809	Y	43	C	Unclassified
540	KV	KCNH2	Q12809	Y	475	C	Unclassified
541	KV	KCNH2	Q12809	Y	493	C	Unclassified
542	KV	KCNH2	Q12809	Y	493	S	Unclassified
543	KV	KCNH2	Q12809	Y	54	H	Unclassified
544	KV	KCNH2	Q12809	Y	569	H	Disease
545	KV	KCNH2	Q12809	Y	597	C	Unclassified
546	KV	KCNH2	Q12809	Y	611	H	Disease
547	KV	KCNH2	Q12809	Y	616	C	Unclassified
548	KV	KCNH4	Q9UQ05	G	797	R	Unclassified
549	KV	KCNH5	Q8NCM2	A	745	T	Polymorphism
550	KV	KCNH5	Q8NCM2	R	327	H	Unclassified
551	KV	KCNH6	Q9H252	G	165	R	Polymorphism
552	KV	KCNH6	Q9H252	T	925	M	Polymorphism
553	KV	KCNH7	Q9NS40	G	958	A	Polymorphism
554	KV	KCNH8	Q96L42	E	984	Q	Polymorphism
555	KV	KCNH8	Q96L42	Q	893	R	Polymorphism
556	KV	KCNQ1	P51787	A	178	P	Disease
557	KV	KCNQ1	P51787	A	178	T	Disease
558	KV	KCNQ1	P51787	A	194	P	Disease
559	KV	KCNQ1	P51787	A	2	V	Unclassified
560	KV	KCNQ1	P51787	A	283	G	Unclassified
561	KV	KCNQ1	P51787	A	287	E	Unclassified
562	KV	KCNQ1	P51787	A	300	T	Disease
563	KV	KCNQ1	P51787	A	302	E	Unclassified
564	KV	KCNQ1	P51787	A	302	T	Unclassified
565	KV	KCNQ1	P51787	A	302	V	Disease
566	KV	KCNQ1	P51787	A	341	E	Disease
567	KV	KCNQ1	P51787	A	341	G	Unclassified
568	KV	KCNQ1	P51787	A	341	V	Disease
569	KV	KCNQ1	P51787	A	344	E	Disease
570	KV	KCNQ1	P51787	A	344	V	Disease
571	KV	KCNQ1	P51787	A	371	T	Disease
572	KV	KCNQ1	P51787	A	372	D	Unclassified
573	KV	KCNQ1	P51787	A	46	T	Unclassified
574	KV	KCNQ1	P51787	A	525	T	Disease
575	KV	KCNQ1	P51787	A	525	V	Unclassified
576	KV	KCNQ1	P51787	A	590	T	Disease
577	KV	KCNQ1	P51787	C	122	Y	Disease
578	KV	KCNQ1	P51787	C	136	F	Disease
579	KV	KCNQ1	P51787	D	202	H	Unclassified
580	KV	KCNQ1	P51787	D	242	N	Disease
581	KV	KCNQ1	P51787	D	317	N	Disease
582	KV	KCNQ1	P51787	D	446	E	Unclassified
583	KV	KCNQ1	P51787	D	611	N	Unclassified
584	KV	KCNQ1	P51787	E	115	G	Disease
585	KV	KCNQ1	P51787	E	146	K	Unclassified
586	KV	KCNQ1	P51787	E	160	K	Disease
587	KV	KCNQ1	P51787	E	261	D	Disease
588	KV	KCNQ1	P51787	E	261	K	Disease
589	KV	KCNQ1	P51787	E	290	K	Disease
590	KV	KCNQ1	P51787	E	385	K	Unclassified
591	KV	KCNQ1	P51787	E	543	K	Unclassified
592	KV	KCNQ1	P51787	E	596	K	Unclassified
593	KV	KCNQ1	P51787	F	127	L	Unclassified
594	KV	KCNQ1	P51787	F	157	C	Disease
595	KV	KCNQ1	P51787	F	275	S	Disease
596	KV	KCNQ1	P51787	F	296	S	Disease
597	KV	KCNQ1	P51787	F	339	S	Disease
598	KV	KCNQ1	P51787	F	339	Y	Unclassified
599	KV	KCNQ1	P51787	F	351	S	Disease
600	KV	KCNQ1	P51787	F	573	L	Unclassified
601	KV	KCNQ1	P51787	G	168	R	Disease
602	KV	KCNQ1	P51787	G	179	S	Unclassified
603	KV	KCNQ1	P51787	G	186	R	Unclassified
604	KV	KCNQ1	P51787	G	189	R	Disease
605	KV	KCNQ1	P51787	G	216	R	Disease
606	KV	KCNQ1	P51787	G	269	D	Disease
607	KV	KCNQ1	P51787	G	269	S	Disease
608	KV	KCNQ1	P51787	G	272	D	Disease
609	KV	KCNQ1	P51787	G	292	D	Disease
610	KV	KCNQ1	P51787	G	306	R	Unclassified
611	KV	KCNQ1	P51787	G	306	V	Disease
612	KV	KCNQ1	P51787	G	314	C	Unclassified
613	KV	KCNQ1	P51787	G	314	D	Disease
614	KV	KCNQ1	P51787	G	314	R	Disease
615	KV	KCNQ1	P51787	G	314	S	Disease
616	KV	KCNQ1	P51787	G	316	E	Disease
617	KV	KCNQ1	P51787	G	316	R	Disease
618	KV	KCNQ1	P51787	G	316	V	Unclassified
619	KV	KCNQ1	P51787	G	325	R	Disease
620	KV	KCNQ1	P51787	G	345	E	Disease
621	KV	KCNQ1	P51787	G	345	R	Disease
622	KV	KCNQ1	P51787	G	350	R	Disease
623	KV	KCNQ1	P51787	G	460	S	Unclassified
624	KV	KCNQ1	P51787	G	548	D	Unclassified
625	KV	KCNQ1	P51787	G	568	R	Disease
626	KV	KCNQ1	P51787	G	589	D	Disease
627	KV	KCNQ1	P51787	G	626	S	Disease
628	KV	KCNQ1	P51787	G	635	R	Unclassified
629	KV	KCNQ1	P51787	G	643	S	Polymorphism
630	KV	KCNQ1	P51787	H	258	N	Unclassified
631	KV	KCNQ1	P51787	H	258	R	Unclassified
632	KV	KCNQ1	P51787	H	455	Y	Disease
633	KV	KCNQ1	P51787	I	198	V	Unclassified
634	KV	KCNQ1	P51787	I	204	F	Disease
635	KV	KCNQ1	P51787	I	204	M	Disease
636	KV	KCNQ1	P51787	I	235	N	Disease
637	KV	KCNQ1	P51787	I	268	S	Unclassified
638	KV	KCNQ1	P51787	I	274	V	Unclassified
639	KV	KCNQ1	P51787	I	313	M	Disease
640	KV	KCNQ1	P51787	I	567	S	Disease
641	KV	KCNQ1	P51787	I	567	T	Disease
642	KV	KCNQ1	P51787	K	318	N	Disease
643	KV	KCNQ1	P51787	K	354	R	Unclassified
644	KV	KCNQ1	P51787	K	362	R	Disease
645	KV	KCNQ1	P51787	K	393	M	Unclassified
646	KV	KCNQ1	P51787	K	393	N	Polymorphism
647	KV	KCNQ1	P51787	K	398	R	Unclassified
648	KV	KCNQ1	P51787	K	526	E	Disease
649	KV	KCNQ1	P51787	K	557	E	Disease
650	KV	KCNQ1	P51787	K	569	E	Unclassified
651	KV	KCNQ1	P51787	L	134	P	Unclassified
652	KV	KCNQ1	P51787	L	137	F	Unclassified
653	KV	KCNQ1	P51787	L	191	P	Disease
654	KV	KCNQ1	P51787	L	239	P	Unclassified
655	KV	KCNQ1	P51787	L	250	H	Disease
656	KV	KCNQ1	P51787	L	250	P	Unclassified
657	KV	KCNQ1	P51787	L	262	V	Disease
658	KV	KCNQ1	P51787	L	266	P	Disease
659	KV	KCNQ1	P51787	L	273	F	Disease
660	KV	KCNQ1	P51787	L	273	R	Disease
661	KV	KCNQ1	P51787	L	282	P	Unclassified
662	KV	KCNQ1	P51787	L	303	P	Unclassified
663	KV	KCNQ1	P51787	L	342	F	Disease
664	KV	KCNQ1	P51787	L	353	P	Disease
665	KV	KCNQ1	P51787	L	374	H	Disease
666	KV	KCNQ1	P51787	L	619	M	Disease
667	KV	KCNQ1	P51787	M	520	R	Unclassified
668	KV	KCNQ1	P51787	N	365	H	Unclassified
669	KV	KCNQ1	P51787	N	586	D	Disease
670	KV	KCNQ1	P51787	P	117	L	Unclassified
671	KV	KCNQ1	P51787	P	320	A	Disease
672	KV	KCNQ1	P51787	P	320	H	Disease
673	KV	KCNQ1	P51787	P	320	S	Unclassified
674	KV	KCNQ1	P51787	P	343	L	Disease
675	KV	KCNQ1	P51787	P	343	R	Unclassified
676	KV	KCNQ1	P51787	P	343	S	Disease
677	KV	KCNQ1	P51787	P	448	L	Unclassified
678	KV	KCNQ1	P51787	P	448	R	Disease
679	KV	KCNQ1	P51787	P	477	L	Unclassified
680	KV	KCNQ1	P51787	P	7	S	Unclassified
681	KV	KCNQ1	P51787	P	73	T	Disease
682	KV	KCNQ1	P51787	Q	547	R	Unclassified
683	KV	KCNQ1	P51787	R	174	C	Disease
684	KV	KCNQ1	P51787	R	174	H	Disease
685	KV	KCNQ1	P51787	R	174	P	Unclassified
686	KV	KCNQ1	P51787	R	190	L	Unclassified
687	KV	KCNQ1	P51787	R	190	Q	Disease
688	KV	KCNQ1	P51787	R	190	W	Unclassified
689	KV	KCNQ1	P51787	R	192	P	Unclassified
690	KV	KCNQ1	P51787	R	195	W	Unclassified
691	KV	KCNQ1	P51787	R	231	C	Disease
692	KV	KCNQ1	P51787	R	231	H	Disease
693	KV	KCNQ1	P51787	R	243	C	Disease
694	KV	KCNQ1	P51787	R	243	H	Disease
695	KV	KCNQ1	P51787	R	243	P	Disease
696	KV	KCNQ1	P51787	R	259	C	Disease
697	KV	KCNQ1	P51787	R	259	H	Unclassified
698	KV	KCNQ1	P51787	R	259	L	Disease
699	KV	KCNQ1	P51787	R	293	C	Disease
700	KV	KCNQ1	P51787	R	360	G	Disease
701	KV	KCNQ1	P51787	R	360	M	Unclassified
702	KV	KCNQ1	P51787	R	360	T	Unclassified
703	KV	KCNQ1	P51787	R	366	P	Disease
704	KV	KCNQ1	P51787	R	366	Q	Disease
705	KV	KCNQ1	P51787	R	366	W	Disease
706	KV	KCNQ1	P51787	R	380	S	Disease
707	KV	KCNQ1	P51787	R	397	W	Unclassified
708	KV	KCNQ1	P51787	R	451	W	Unclassified
709	KV	KCNQ1	P51787	R	452	W	Disease
710	KV	KCNQ1	P51787	R	511	W	Unclassified
711	KV	KCNQ1	P51787	R	518	G	Unclassified
712	KV	KCNQ1	P51787	R	518	P	Unclassified
713	KV	KCNQ1	P51787	R	518	Q	Unclassified
714	KV	KCNQ1	P51787	R	533	W	Disease
715	KV	KCNQ1	P51787	R	539	Q	Unclassified
716	KV	KCNQ1	P51787	R	539	W	Disease
717	KV	KCNQ1	P51787	R	555	C	Disease
718	KV	KCNQ1	P51787	R	555	H	Disease
719	KV	KCNQ1	P51787	R	555	S	Unclassified
720	KV	KCNQ1	P51787	R	583	C	Disease
721	KV	KCNQ1	P51787	R	583	H	Unclassified
722	KV	KCNQ1	P51787	R	591	C	Unclassified
723	KV	KCNQ1	P51787	R	591	H	Disease
724	KV	KCNQ1	P51787	R	594	P	Unclassified
725	KV	KCNQ1	P51787	R	594	Q	Disease
726	KV	KCNQ1	P51787	S	140	G	Disease
727	KV	KCNQ1	P51787	S	199	A	Unclassified
728	KV	KCNQ1	P51787	S	209	F	Unclassified
729	KV	KCNQ1	P51787	S	225	L	Disease
730	KV	KCNQ1	P51787	S	277	L	Disease
731	KV	KCNQ1	P51787	S	277	P	Unclassified
732	KV	KCNQ1	P51787	S	277	W	Unclassified
733	KV	KCNQ1	P51787	S	349	P	Unclassified
734	KV	KCNQ1	P51787	S	349	W	Disease
735	KV	KCNQ1	P51787	S	373	P	Disease
736	KV	KCNQ1	P51787	S	389	P	Unclassified
737	KV	KCNQ1	P51787	S	389	Y	Disease
738	KV	KCNQ1	P51787	S	546	L	Disease
739	KV	KCNQ1	P51787	S	566	F	Disease
740	KV	KCNQ1	P51787	S	566	P	Unclassified
741	KV	KCNQ1	P51787	S	566	Y	Disease
742	KV	KCNQ1	P51787	S	571	L	Unclassified
743	KV	KCNQ1	P51787	S	66	F	Unclassified
744	KV	KCNQ1	P51787	T	144	A	Unclassified
745	KV	KCNQ1	P51787	T	153	M	Unclassified
746	KV	KCNQ1	P51787	T	224	M	Unclassified
747	KV	KCNQ1	P51787	T	265	I	Unclassified
748	KV	KCNQ1	P51787	T	309	R	Disease
749	KV	KCNQ1	P51787	T	311	I	Disease
750	KV	KCNQ1	P51787	T	312	I	Disease
751	KV	KCNQ1	P51787	T	322	A	Disease
752	KV	KCNQ1	P51787	T	322	M	Disease
753	KV	KCNQ1	P51787	T	391	I	Disease
754	KV	KCNQ1	P51787	T	587	M	Disease
755	KV	KCNQ1	P51787	T	600	M	Unclassified
756	KV	KCNQ1	P51787	V	133	I	Disease
757	KV	KCNQ1	P51787	V	162	M	Unclassified
758	KV	KCNQ1	P51787	V	172	M	Unclassified
759	KV	KCNQ1	P51787	V	173	D	Unclassified
760	KV	KCNQ1	P51787	V	215	M	Disease
761	KV	KCNQ1	P51787	V	241	G	Unclassified
762	KV	KCNQ1	P51787	V	254	L	Unclassified
763	KV	KCNQ1	P51787	V	254	M	Disease
764	KV	KCNQ1	P51787	V	280	E	Disease
765	KV	KCNQ1	P51787	V	307	L	Disease
766	KV	KCNQ1	P51787	V	308	D	Unclassified
767	KV	KCNQ1	P51787	V	310	I	Disease
768	KV	KCNQ1	P51787	V	417	M	Disease
769	KV	KCNQ1	P51787	V	524	G	Disease
770	KV	KCNQ1	P51787	V	541	I	Unclassified
771	KV	KCNQ1	P51787	V	554	A	Unclassified
772	KV	KCNQ1	P51787	W	248	F	Disease
773	KV	KCNQ1	P51787	W	248	R	Disease
774	KV	KCNQ1	P51787	W	304	R	Disease
775	KV	KCNQ1	P51787	W	305	R	Unclassified
776	KV	KCNQ1	P51787	W	305	S	Disease
777	KV	KCNQ1	P51787	W	379	G	Unclassified
778	KV	KCNQ1	P51787	W	392	R	Disease
779	KV	KCNQ1	P51787	Y	111	C	Unclassified
780	KV	KCNQ1	P51787	Y	184	H	Unclassified
781	KV	KCNQ1	P51787	Y	184	S	Disease
782	KV	KCNQ1	P51787	Y	278	H	Disease
783	KV	KCNQ1	P51787	Y	281	C	Disease
784	KV	KCNQ1	P51787	Y	315	C	Disease
785	KV	KCNQ1	P51787	Y	315	S	Disease
786	KV	KCNQ1	P51787	Y	522	S	Unclassified
787	KV	KCNQ2	O43526	A	196	V	Disease
788	KV	KCNQ2	O43526	A	294	V	Disease
789	KV	KCNQ2	O43526	A	306	T	Disease
790	KV	KCNQ2	O43526	D	266	E	Disease
791	KV	KCNQ2	O43526	G	159	E	Disease
792	KV	KCNQ2	O43526	G	159	R	Disease
793	KV	KCNQ2	O43526	G	301	S	Disease
794	KV	KCNQ2	O43526	H	228	Q	Disease
795	KV	KCNQ2	O43526	K	554	N	Disease
796	KV	KCNQ2	O43526	L	243	F	Disease
797	KV	KCNQ2	O43526	L	268	F	Disease
798	KV	KCNQ2	O43526	L	637	R	Disease
799	KV	KCNQ2	O43526	M	208	V	Disease
800	KV	KCNQ2	O43526	M	578	V	Disease
801	KV	KCNQ2	O43526	N	780	T	Polymorphism
802	KV	KCNQ2	O43526	P	561	S	Disease
803	KV	KCNQ2	O43526	P	777	S	Unclassified
804	KV	KCNQ2	O43526	R	201	C	Disease
805	KV	KCNQ2	O43526	R	207	Q	Polymorphism
806	KV	KCNQ2	O43526	R	207	W	Disease
807	KV	KCNQ2	O43526	R	210	C	Disease
808	KV	KCNQ2	O43526	R	213	Q	Disease
809	KV	KCNQ2	O43526	R	213	W	Unclassified
810	KV	KCNQ2	O43526	R	214	W	Disease
811	KV	KCNQ2	O43526	R	291	S	Disease
812	KV	KCNQ2	O43526	R	333	Q	Disease
813	KV	KCNQ2	O43526	R	353	G	Disease
814	KV	KCNQ2	O43526	R	547	W	Disease
815	KV	KCNQ2	O43526	R	581	Q	Disease
816	KV	KCNQ2	O43526	R	588	S	Disease
817	KV	KCNQ2	O43526	S	247	W	Disease
818	KV	KCNQ2	O43526	S	358	F	Disease
819	KV	KCNQ2	O43526	T	114	A	Disease
820	KV	KCNQ2	O43526	T	217	A	Disease
821	KV	KCNQ2	O43526	T	234	P	Disease
822	KV	KCNQ2	O43526	T	276	I	Disease
823	KV	KCNQ2	O43526	Y	154	D	Disease
824	KV	KCNQ2	O43526	Y	284	C	Disease
825	KV	KCNQ3	O43525	D	305	G	Disease
826	KV	KCNQ3	O43525	E	414	G	Polymorphism
827	KV	KCNQ3	O43525	G	310	V	Disease
828	KV	KCNQ3	O43525	G	340	V	Unclassified
829	KV	KCNQ3	O43525	N	468	S	Polymorphism
830	KV	KCNQ3	O43525	P	574	S	Unclassified
831	KV	KCNQ3	O43525	R	780	C	Unclassified
832	KV	KCNQ3	O43525	W	309	R	Disease
833	KV	KCNQ4	P56696	G	285	C	Disease
834	KV	KCNQ4	P56696	G	285	S	Disease
835	KV	KCNQ4	P56696	G	287	R	Disease
836	KV	KCNQ4	P56696	G	321	S	Disease
837	KV	KCNQ4	P56696	H	455	Q	Polymorphism
838	KV	KCNQ4	P56696	L	274	H	Disease
839	KV	KCNQ4	P56696	L	281	S	Disease
840	KV	KCNQ4	P56696	W	276	S	Disease
841	KV	KCNQ5	Q9NR82	L	341	I	Disease
842	KV	KCNQ5	Q9NR82	P	369	R	Disease
843	KV	KCNQ5	Q9NR82	R	244	C	Unclassified
844	KV	KCNQ5	Q9NR82	S	429	I	Disease
845	KV	KCNQ5	Q9NR82	V	145	G	Disease
846	KV	KCNQ5	Q9NR82	W	191	G	Unclassified
847	KV	KCNS1	Q96KK3	I	489	V	Polymorphism
848	KV	KCNS1	Q96KK3	Q	508	R	Polymorphism
849	KV	KCNS3	Q9BQ31	T	450	A	Polymorphism
850	KV	KCNS3	Q9BQ31	V	225	L	Polymorphism
851	KV	KCNV1	Q6PIU1	D	22	G	Polymorphism
852	KV	KCNV2	Q8TDN2	A	259	V	Disease
853	KV	KCNV2	Q8TDN2	G	459	D	Disease
854	KV	KCNV2	Q8TDN2	L	126	Q	Disease
855	KV	KCNV2	Q8TDN2	L	533	V	Polymorphism
856	KV	KCNV2	Q8TDN2	S	256	W	Disease
857	KV	KCNV2	Q8TDN2	W	188	C	Disease
858	NaV	SCN10A	Q9Y5Y9	A	1304	T	Disease
859	NaV	SCN10A	Q9Y5Y9	C	1523	Y	Polymorphism
860	NaV	SCN10A	Q9Y5Y9	D	1056	N	Polymorphism
861	NaV	SCN10A	Q9Y5Y9	G	1662	S	Polymorphism
862	NaV	SCN10A	Q9Y5Y9	G	590	R	Polymorphism
863	NaV	SCN10A	Q9Y5Y9	L	1092	P	Polymorphism
864	NaV	SCN10A	Q9Y5Y9	L	554	P	Disease
865	NaV	SCN10A	Q9Y5Y9	M	1713	V	Polymorphism
866	NaV	SCN10A	Q9Y5Y9	P	939	L	Polymorphism
867	NaV	SCN10A	Q9Y5Y9	Q	940	L	Polymorphism
868	NaV	SCN10A	Q9Y5Y9	R	916	W	Polymorphism
869	NaV	SCN10A	Q9Y5Y9	S	509	P	Polymorphism
870	NaV	SCN10A	Q9Y5Y9	V	1073	A	Polymorphism
871	NaV	SCN11A	Q9UI33	A	582	T	Polymorphism
872	NaV	SCN11A	Q9UI33	A	681	D	Polymorphism
873	NaV	SCN11A	Q9UI33	A	808	G	Disease
874	NaV	SCN11A	Q9UI33	A	842	P	Polymorphism
875	NaV	SCN11A	Q9UI33	F	1689	L	Polymorphism
876	NaV	SCN11A	Q9UI33	G	481	E	Polymorphism
877	NaV	SCN11A	Q9UI33	G	699	R	Disease
878	NaV	SCN11A	Q9UI33	I	381	T	Disease
879	NaV	SCN11A	Q9UI33	K	419	N	Polymorphism
880	NaV	SCN11A	Q9UI33	L	1158	P	Disease
881	NaV	SCN11A	Q9UI33	L	811	P	Disease
882	NaV	SCN11A	Q9UI33	M	777	R	Polymorphism
883	NaV	SCN11A	Q9UI33	P	308	L	Polymorphism
884	NaV	SCN11A	Q9UI33	R	222	H	Disease
885	NaV	SCN11A	Q9UI33	R	222	S	Disease
886	NaV	SCN11A	Q9UI33	R	225	C	Disease
887	NaV	SCN11A	Q9UI33	T	1609	I	Polymorphism
888	NaV	SCN11A	Q9UI33	V	1184	A	Disease
889	NaV	SCN11A	Q9UI33	V	909	I	Polymorphism
890	NaV	SCN11A	Q9UI33	Y	1198	H	Polymorphism
891	NaV	SCN1A	P35498	A	1067	T	Polymorphism
892	NaV	SCN1A	P35498	A	1255	D	Disease
893	NaV	SCN1A	P35498	A	1320	V	Disease
894	NaV	SCN1A	P35498	A	1326	D	Disease
895	NaV	SCN1A	P35498	A	1326	P	Disease
896	NaV	SCN1A	P35498	A	1339	V	Disease
897	NaV	SCN1A	P35498	A	1370	P	Disease
898	NaV	SCN1A	P35498	A	1429	D	Disease
899	NaV	SCN1A	P35498	A	1440	V	Unclassified
900	NaV	SCN1A	P35498	A	1441	P	Disease
901	NaV	SCN1A	P35498	A	1653	E	Disease
902	NaV	SCN1A	P35498	A	1662	V	Disease
903	NaV	SCN1A	P35498	A	1685	D	Disease
904	NaV	SCN1A	P35498	A	1685	V	Disease
905	NaV	SCN1A	P35498	A	1724	P	Disease
906	NaV	SCN1A	P35498	A	175	T	Disease
907	NaV	SCN1A	P35498	A	175	V	Disease
908	NaV	SCN1A	P35498	A	1783	T	Disease
909	NaV	SCN1A	P35498	A	1783	V	Disease
910	NaV	SCN1A	P35498	A	1792	T	Disease
911	NaV	SCN1A	P35498	A	1832	P	Disease
912	NaV	SCN1A	P35498	A	223	E	Disease
913	NaV	SCN1A	P35498	A	239	T	Disease
914	NaV	SCN1A	P35498	A	239	V	Disease
915	NaV	SCN1A	P35498	A	333	V	Polymorphism
916	NaV	SCN1A	P35498	A	342	V	Disease
917	NaV	SCN1A	P35498	A	395	P	Disease
918	NaV	SCN1A	P35498	A	924	T	Polymorphism
919	NaV	SCN1A	P35498	A	98	P	Disease
920	NaV	SCN1A	P35498	C	1376	R	Disease
921	NaV	SCN1A	P35498	C	1396	G	Disease
922	NaV	SCN1A	P35498	C	1396	Y	Disease
923	NaV	SCN1A	P35498	C	1588	R	Disease
924	NaV	SCN1A	P35498	C	1716	R	Disease
925	NaV	SCN1A	P35498	C	1741	R	Disease
926	NaV	SCN1A	P35498	C	1756	G	Disease
927	NaV	SCN1A	P35498	C	179	R	Disease
928	NaV	SCN1A	P35498	C	277	R	Disease
929	NaV	SCN1A	P35498	C	345	R	Disease
930	NaV	SCN1A	P35498	C	351	W	Disease
931	NaV	SCN1A	P35498	C	927	F	Disease
932	NaV	SCN1A	P35498	C	949	S	Disease
933	NaV	SCN1A	P35498	C	949	Y	Disease
934	NaV	SCN1A	P35498	C	959	R	Disease
935	NaV	SCN1A	P35498	D	1006	E	Disease
936	NaV	SCN1A	P35498	D	1239	G	Disease
937	NaV	SCN1A	P35498	D	1239	Y	Disease
938	NaV	SCN1A	P35498	D	1288	N	Disease
939	NaV	SCN1A	P35498	D	1416	G	Disease
940	NaV	SCN1A	P35498	D	1484	G	Disease
941	NaV	SCN1A	P35498	D	1544	A	Disease
942	NaV	SCN1A	P35498	D	1544	G	Disease
943	NaV	SCN1A	P35498	D	1608	G	Disease
944	NaV	SCN1A	P35498	D	1608	Y	Disease
945	NaV	SCN1A	P35498	D	1727	G	Disease
946	NaV	SCN1A	P35498	D	1742	G	Disease
947	NaV	SCN1A	P35498	D	1866	Y	Disease
948	NaV	SCN1A	P35498	D	188	V	Disease
949	NaV	SCN1A	P35498	D	194	G	Disease
950	NaV	SCN1A	P35498	D	194	N	Disease
951	NaV	SCN1A	P35498	D	366	E	Disease
952	NaV	SCN1A	P35498	D	382	N	Disease
953	NaV	SCN1A	P35498	D	45	N	Unclassified
954	NaV	SCN1A	P35498	D	674	G	Disease
955	NaV	SCN1A	P35498	D	79	H	Disease
956	NaV	SCN1A	P35498	D	79	N	Disease
957	NaV	SCN1A	P35498	D	998	G	Disease
958	NaV	SCN1A	P35498	E	1068	K	Disease
959	NaV	SCN1A	P35498	E	1221	K	Disease
960	NaV	SCN1A	P35498	E	1238	D	Disease
961	NaV	SCN1A	P35498	E	1266	A	Disease
962	NaV	SCN1A	P35498	E	1308	D	Unclassified
963	NaV	SCN1A	P35498	E	1454	K	Disease
964	NaV	SCN1A	P35498	E	1503	K	Disease
965	NaV	SCN1A	P35498	E	1561	K	Disease
966	NaV	SCN1A	P35498	E	1787	K	Disease
967	NaV	SCN1A	P35498	E	1795	K	Disease
968	NaV	SCN1A	P35498	E	1881	D	Disease
969	NaV	SCN1A	P35498	E	1957	G	Polymorphism
970	NaV	SCN1A	P35498	E	289	V	Disease
971	NaV	SCN1A	P35498	E	616	D	Disease
972	NaV	SCN1A	P35498	E	78	D	Disease
973	NaV	SCN1A	P35498	E	846	K	Disease
974	NaV	SCN1A	P35498	E	954	K	Disease
975	NaV	SCN1A	P35498	F	1038	L	Unclassified
976	NaV	SCN1A	P35498	F	1263	L	Disease
977	NaV	SCN1A	P35498	F	1357	L	Disease
978	NaV	SCN1A	P35498	F	1385	V	Disease
979	NaV	SCN1A	P35498	F	1431	I	Disease
980	NaV	SCN1A	P35498	F	1463	S	Disease
981	NaV	SCN1A	P35498	F	1472	S	Disease
982	NaV	SCN1A	P35498	F	1499	L	Disease
983	NaV	SCN1A	P35498	F	1543	S	Polymorphism
984	NaV	SCN1A	P35498	F	1661	S	Disease
985	NaV	SCN1A	P35498	F	1687	S	Disease
986	NaV	SCN1A	P35498	F	1692	S	Disease
987	NaV	SCN1A	P35498	F	1707	V	Disease
988	NaV	SCN1A	P35498	F	1765	L	Disease
989	NaV	SCN1A	P35498	F	178	S	Disease
990	NaV	SCN1A	P35498	F	1808	I	Disease
991	NaV	SCN1A	P35498	F	1808	L	Disease
992	NaV	SCN1A	P35498	F	1831	S	Disease
993	NaV	SCN1A	P35498	F	218	L	Disease
994	NaV	SCN1A	P35498	F	383	L	Disease
995	NaV	SCN1A	P35498	F	403	L	Disease
996	NaV	SCN1A	P35498	F	403	V	Disease
997	NaV	SCN1A	P35498	F	63	L	Disease
998	NaV	SCN1A	P35498	F	90	S	Disease
999	NaV	SCN1A	P35498	F	902	C	Disease
1000	NaV	SCN1A	P35498	F	945	L	Disease
1001	NaV	SCN1A	P35498	F	987	L	Disease
1002	NaV	SCN1A	P35498	G	1233	R	Disease
1003	NaV	SCN1A	P35498	G	1275	A	Unclassified
1004	NaV	SCN1A	P35498	G	1275	V	Disease
1005	NaV	SCN1A	P35498	G	1433	E	Disease
1006	NaV	SCN1A	P35498	G	1433	R	Disease
1007	NaV	SCN1A	P35498	G	1433	V	Disease
1008	NaV	SCN1A	P35498	G	1470	W	Disease
1009	NaV	SCN1A	P35498	G	1480	V	Disease
1010	NaV	SCN1A	P35498	G	1586	E	Disease
1011	NaV	SCN1A	P35498	G	1674	R	Disease
1012	NaV	SCN1A	P35498	G	1674	S	Unclassified
1013	NaV	SCN1A	P35498	G	1688	W	Disease
1014	NaV	SCN1A	P35498	G	1725	C	Disease
1015	NaV	SCN1A	P35498	G	1749	E	Disease
1016	NaV	SCN1A	P35498	G	1762	E	Disease
1017	NaV	SCN1A	P35498	G	177	E	Disease
1018	NaV	SCN1A	P35498	G	1880	E	Disease
1019	NaV	SCN1A	P35498	G	232	S	Disease
1020	NaV	SCN1A	P35498	G	265	W	Disease
1021	NaV	SCN1A	P35498	G	343	D	Disease
1022	NaV	SCN1A	P35498	G	355	D	Disease
1023	NaV	SCN1A	P35498	G	58	V	Disease
1024	NaV	SCN1A	P35498	G	950	E	Disease
1025	NaV	SCN1A	P35498	G	950	R	Disease
1026	NaV	SCN1A	P35498	G	979	R	Disease
1027	NaV	SCN1A	P35498	G	979	V	Disease
1028	NaV	SCN1A	P35498	H	127	D	Disease
1029	NaV	SCN1A	P35498	H	1393	P	Disease
1030	NaV	SCN1A	P35498	H	290	R	Disease
1031	NaV	SCN1A	P35498	H	933	P	Disease
1032	NaV	SCN1A	P35498	H	939	P	Unclassified
1033	NaV	SCN1A	P35498	H	939	Q	Disease
1034	NaV	SCN1A	P35498	H	939	Y	Disease
1035	NaV	SCN1A	P35498	I	1034	T	Polymorphism
1036	NaV	SCN1A	P35498	I	124	N	Disease
1037	NaV	SCN1A	P35498	I	1344	M	Disease
1038	NaV	SCN1A	P35498	I	1437	M	Disease
1039	NaV	SCN1A	P35498	I	1483	M	Disease
1040	NaV	SCN1A	P35498	I	1545	V	Disease
1041	NaV	SCN1A	P35498	I	1638	N	Disease
1042	NaV	SCN1A	P35498	I	1638	T	Disease
1043	NaV	SCN1A	P35498	I	1656	M	Disease
1044	NaV	SCN1A	P35498	I	1673	T	Disease
1045	NaV	SCN1A	P35498	I	1683	F	Disease
1046	NaV	SCN1A	P35498	I	1683	T	Disease
1047	NaV	SCN1A	P35498	I	171	K	Disease
1048	NaV	SCN1A	P35498	I	171	R	Disease
1049	NaV	SCN1A	P35498	I	1763	N	Disease
1050	NaV	SCN1A	P35498	I	1770	F	Disease
1051	NaV	SCN1A	P35498	I	1770	N	Disease
1052	NaV	SCN1A	P35498	I	1770	T	Disease
1053	NaV	SCN1A	P35498	I	1771	F	Disease
1054	NaV	SCN1A	P35498	I	1771	N	Disease
1055	NaV	SCN1A	P35498	I	1782	M	Disease
1056	NaV	SCN1A	P35498	I	1782	S	Disease
1057	NaV	SCN1A	P35498	I	1867	T	Disease
1058	NaV	SCN1A	P35498	I	1922	T	Disease
1059	NaV	SCN1A	P35498	I	1955	T	Polymorphism
1060	NaV	SCN1A	P35498	I	227	S	Disease
1061	NaV	SCN1A	P35498	I	227	T	Disease
1062	NaV	SCN1A	P35498	I	252	M	Disease
1063	NaV	SCN1A	P35498	I	252	N	Disease
1064	NaV	SCN1A	P35498	I	68	T	Disease
1065	NaV	SCN1A	P35498	I	899	T	Disease
1066	NaV	SCN1A	P35498	I	91	T	Disease
1067	NaV	SCN1A	P35498	I	943	N	Disease
1068	NaV	SCN1A	P35498	I	978	M	Unclassified
1069	NaV	SCN1A	P35498	K	1249	N	Disease
1070	NaV	SCN1A	P35498	K	1270	T	Disease
1071	NaV	SCN1A	P35498	L	108	R	Disease
1072	NaV	SCN1A	P35498	L	1207	P	Disease
1073	NaV	SCN1A	P35498	L	1230	F	Disease
1074	NaV	SCN1A	P35498	L	1265	P	Disease
1075	NaV	SCN1A	P35498	L	1287	P	Disease
1076	NaV	SCN1A	P35498	L	1309	F	Disease
1077	NaV	SCN1A	P35498	L	1355	P	Disease
1078	NaV	SCN1A	P35498	L	1423	F	Disease
1079	NaV	SCN1A	P35498	L	1426	R	Disease
1080	NaV	SCN1A	P35498	L	1461	I	Disease
1081	NaV	SCN1A	P35498	L	1475	S	Disease
1082	NaV	SCN1A	P35498	L	1514	S	Disease
1083	NaV	SCN1A	P35498	L	1592	H	Disease
1084	NaV	SCN1A	P35498	L	1592	P	Disease
1085	NaV	SCN1A	P35498	L	1649	Q	Disease
1086	NaV	SCN1A	P35498	L	1660	P	Disease
1087	NaV	SCN1A	P35498	L	1667	P	Disease
1088	NaV	SCN1A	P35498	L	1675	R	Disease
1089	NaV	SCN1A	P35498	L	1677	F	Disease
1090	NaV	SCN1A	P35498	L	1835	F	Disease
1091	NaV	SCN1A	P35498	L	233	R	Disease
1092	NaV	SCN1A	P35498	L	378	Q	Disease
1093	NaV	SCN1A	P35498	L	409	W	Disease
1094	NaV	SCN1A	P35498	L	61	F	Disease
1095	NaV	SCN1A	P35498	L	783	P	Disease
1096	NaV	SCN1A	P35498	L	842	R	Disease
1097	NaV	SCN1A	P35498	L	876	I	Disease
1098	NaV	SCN1A	P35498	L	890	P	Disease
1099	NaV	SCN1A	P35498	L	942	P	Disease
1100	NaV	SCN1A	P35498	L	986	F	Disease
1101	NaV	SCN1A	P35498	L	986	P	Disease
1102	NaV	SCN1A	P35498	M	145	T	Disease
1103	NaV	SCN1A	P35498	M	1511	K	Disease
1104	NaV	SCN1A	P35498	M	1555	R	Disease
1105	NaV	SCN1A	P35498	M	1619	V	Disease
1106	NaV	SCN1A	P35498	M	1664	K	Disease
1107	NaV	SCN1A	P35498	M	1714	K	Disease
1108	NaV	SCN1A	P35498	M	1714	R	Disease
1109	NaV	SCN1A	P35498	M	1780	T	Disease
1110	NaV	SCN1A	P35498	M	1852	K	Disease
1111	NaV	SCN1A	P35498	M	1852	T	Disease
1112	NaV	SCN1A	P35498	M	1977	L	Unclassified
1113	NaV	SCN1A	P35498	M	379	R	Disease
1114	NaV	SCN1A	P35498	M	400	V	Disease
1115	NaV	SCN1A	P35498	M	785	T	Disease
1116	NaV	SCN1A	P35498	M	934	I	Disease
1117	NaV	SCN1A	P35498	M	956	K	Disease
1118	NaV	SCN1A	P35498	M	960	T	Disease
1119	NaV	SCN1A	P35498	M	960	V	Disease
1120	NaV	SCN1A	P35498	M	973	K	Disease
1121	NaV	SCN1A	P35498	M	973	V	Disease
1122	NaV	SCN1A	P35498	M	976	I	Disease
1123	NaV	SCN1A	P35498	N	1011	I	Disease
1124	NaV	SCN1A	P35498	N	1367	K	Disease
1125	NaV	SCN1A	P35498	N	1378	H	Disease
1126	NaV	SCN1A	P35498	N	1378	T	Disease
1127	NaV	SCN1A	P35498	N	1391	S	Disease
1128	NaV	SCN1A	P35498	N	1414	D	Disease
1129	NaV	SCN1A	P35498	N	1414	Y	Disease
1130	NaV	SCN1A	P35498	N	1417	S	Disease
1131	NaV	SCN1A	P35498	N	1476	K	Disease
1132	NaV	SCN1A	P35498	N	1485	Y	Disease
1133	NaV	SCN1A	P35498	N	1605	I	Disease
1134	NaV	SCN1A	P35498	N	1605	S	Disease
1135	NaV	SCN1A	P35498	N	1672	I	Disease
1136	NaV	SCN1A	P35498	N	1788	K	Unclassified
1137	NaV	SCN1A	P35498	N	191	K	Disease
1138	NaV	SCN1A	P35498	N	191	Y	Disease
1139	NaV	SCN1A	P35498	N	357	I	Disease
1140	NaV	SCN1A	P35498	N	359	S	Disease
1141	NaV	SCN1A	P35498	N	762	D	Disease
1142	NaV	SCN1A	P35498	N	935	H	Disease
1143	NaV	SCN1A	P35498	N	985	I	Disease
1144	NaV	SCN1A	P35498	P	1109	T	Polymorphism
1145	NaV	SCN1A	P35498	P	113	T	Disease
1146	NaV	SCN1A	P35498	P	1345	L	Disease
1147	NaV	SCN1A	P35498	P	1451	L	Disease
1148	NaV	SCN1A	P35498	P	1451	S	Disease
1149	NaV	SCN1A	P35498	P	1632	S	Disease
1150	NaV	SCN1A	P35498	P	1668	A	Disease
1151	NaV	SCN1A	P35498	P	1668	L	Disease
1152	NaV	SCN1A	P35498	P	1739	L	Disease
1153	NaV	SCN1A	P35498	P	1855	L	Disease
1154	NaV	SCN1A	P35498	P	281	A	Disease
1155	NaV	SCN1A	P35498	P	281	L	Disease
1156	NaV	SCN1A	P35498	P	281	S	Disease
1157	NaV	SCN1A	P35498	P	358	T	Disease
1158	NaV	SCN1A	P35498	Q	1427	P	Disease
1159	NaV	SCN1A	P35498	Q	1450	K	Disease
1160	NaV	SCN1A	P35498	Q	1450	R	Disease
1161	NaV	SCN1A	P35498	Q	1489	H	Disease
1162	NaV	SCN1A	P35498	Q	1489	K	Disease
1163	NaV	SCN1A	P35498	R	101	Q	Disease
1164	NaV	SCN1A	P35498	R	101	W	Disease
1165	NaV	SCN1A	P35498	R	118	S	Disease
1166	NaV	SCN1A	P35498	R	1208	K	Disease
1167	NaV	SCN1A	P35498	R	1213	Q	Disease
1168	NaV	SCN1A	P35498	R	1245	Q	Disease
1169	NaV	SCN1A	P35498	R	1316	G	Disease
1170	NaV	SCN1A	P35498	R	1316	S	Disease
1171	NaV	SCN1A	P35498	R	1325	T	Disease
1172	NaV	SCN1A	P35498	R	1575	C	Unclassified
1173	NaV	SCN1A	P35498	R	1596	C	Disease
1174	NaV	SCN1A	P35498	R	1596	H	Disease
1175	NaV	SCN1A	P35498	R	1596	L	Disease
1176	NaV	SCN1A	P35498	R	1636	Q	Disease
1177	NaV	SCN1A	P35498	R	1639	G	Disease
1178	NaV	SCN1A	P35498	R	1642	S	Disease
1179	NaV	SCN1A	P35498	R	1645	Q	Disease
1180	NaV	SCN1A	P35498	R	1648	C	Disease
1181	NaV	SCN1A	P35498	R	1648	H	Disease
1182	NaV	SCN1A	P35498	R	1657	C	Disease
1183	NaV	SCN1A	P35498	R	1657	H	Disease
1184	NaV	SCN1A	P35498	R	1861	W	Disease
1185	NaV	SCN1A	P35498	R	1928	G	Polymorphism
1186	NaV	SCN1A	P35498	R	1988	W	Unclassified
1187	NaV	SCN1A	P35498	R	27	T	Disease
1188	NaV	SCN1A	P35498	R	322	I	Disease
1189	NaV	SCN1A	P35498	R	356	G	Disease
1190	NaV	SCN1A	P35498	R	377	Q	Disease
1191	NaV	SCN1A	P35498	R	393	C	Disease
1192	NaV	SCN1A	P35498	R	393	H	Disease
1193	NaV	SCN1A	P35498	R	393	S	Disease
1194	NaV	SCN1A	P35498	R	542	Q	Unclassified
1195	NaV	SCN1A	P35498	R	604	H	Polymorphism
1196	NaV	SCN1A	P35498	R	859	C	Disease
1197	NaV	SCN1A	P35498	R	859	H	Disease
1198	NaV	SCN1A	P35498	R	862	Q	Disease
1199	NaV	SCN1A	P35498	R	865	G	Disease
1200	NaV	SCN1A	P35498	R	931	C	Disease
1201	NaV	SCN1A	P35498	R	931	H	Disease
1202	NaV	SCN1A	P35498	R	946	C	Disease
1203	NaV	SCN1A	P35498	R	946	H	Disease
1204	NaV	SCN1A	P35498	R	946	S	Disease
1205	NaV	SCN1A	P35498	S	103	G	Disease
1206	NaV	SCN1A	P35498	S	1231	R	Disease
1207	NaV	SCN1A	P35498	S	1231	T	Disease
1208	NaV	SCN1A	P35498	S	1328	P	Disease
1209	NaV	SCN1A	P35498	S	1713	N	Disease
1210	NaV	SCN1A	P35498	S	1773	F	Disease
1211	NaV	SCN1A	P35498	S	228	P	Disease
1212	NaV	SCN1A	P35498	S	243	Y	Disease
1213	NaV	SCN1A	P35498	S	259	R	Disease
1214	NaV	SCN1A	P35498	S	291	G	Disease
1215	NaV	SCN1A	P35498	S	340	F	Disease
1216	NaV	SCN1A	P35498	S	525	F	Disease
1217	NaV	SCN1A	P35498	S	626	G	Disease
1218	NaV	SCN1A	P35498	S	74	P	Disease
1219	NaV	SCN1A	P35498	S	843	R	Disease
1220	NaV	SCN1A	P35498	S	940	F	Disease
1221	NaV	SCN1A	P35498	S	993	R	Disease
1222	NaV	SCN1A	P35498	T	105	I	Disease
1223	NaV	SCN1A	P35498	T	112	I	Disease
1224	NaV	SCN1A	P35498	T	1174	S	Disease
1225	NaV	SCN1A	P35498	T	1210	K	Disease
1226	NaV	SCN1A	P35498	T	1250	M	Disease
1227	NaV	SCN1A	P35498	T	1260	P	Disease
1228	NaV	SCN1A	P35498	T	1394	I	Disease
1229	NaV	SCN1A	P35498	T	162	P	Disease
1230	NaV	SCN1A	P35498	T	1658	M	Disease
1231	NaV	SCN1A	P35498	T	1658	R	Disease
1232	NaV	SCN1A	P35498	T	1709	I	Disease
1233	NaV	SCN1A	P35498	T	1721	R	Disease
1234	NaV	SCN1A	P35498	T	1909	I	Disease
1235	NaV	SCN1A	P35498	T	199	R	Disease
1236	NaV	SCN1A	P35498	T	217	K	Disease
1237	NaV	SCN1A	P35498	T	226	M	Disease
1238	NaV	SCN1A	P35498	T	226	R	Disease
1239	NaV	SCN1A	P35498	T	254	I	Disease
1240	NaV	SCN1A	P35498	T	297	I	Disease
1241	NaV	SCN1A	P35498	T	363	P	Disease
1242	NaV	SCN1A	P35498	T	363	R	Disease
1243	NaV	SCN1A	P35498	T	808	S	Disease
1244	NaV	SCN1A	P35498	T	812	I	Disease
1245	NaV	SCN1A	P35498	T	812	R	Disease
1246	NaV	SCN1A	P35498	T	875	K	Disease
1247	NaV	SCN1A	P35498	T	875	M	Disease
1248	NaV	SCN1A	P35498	V	1079	I	Polymorphism
1249	NaV	SCN1A	P35498	V	1335	M	Disease
1250	NaV	SCN1A	P35498	V	1350	G	Disease
1251	NaV	SCN1A	P35498	V	1353	L	Disease
1252	NaV	SCN1A	P35498	V	1366	I	Disease
1253	NaV	SCN1A	P35498	V	1390	M	Disease
1254	NaV	SCN1A	P35498	V	1418	G	Disease
1255	NaV	SCN1A	P35498	V	1428	A	Disease
1256	NaV	SCN1A	P35498	V	1538	I	Disease
1257	NaV	SCN1A	P35498	V	1579	E	Disease
1258	NaV	SCN1A	P35498	V	1611	F	Disease
1259	NaV	SCN1A	P35498	V	1612	I	Disease
1260	NaV	SCN1A	P35498	V	1630	L	Disease
1261	NaV	SCN1A	P35498	V	1630	M	Disease
1262	NaV	SCN1A	P35498	V	1637	E	Disease
1263	NaV	SCN1A	P35498	V	1857	L	Disease
1264	NaV	SCN1A	P35498	V	406	F	Disease
1265	NaV	SCN1A	P35498	V	422	E	Disease
1266	NaV	SCN1A	P35498	V	699	I	Polymorphism
1267	NaV	SCN1A	P35498	V	896	F	Disease
1268	NaV	SCN1A	P35498	V	896	I	Disease
1269	NaV	SCN1A	P35498	V	896	L	Disease
1270	NaV	SCN1A	P35498	V	944	A	Disease
1271	NaV	SCN1A	P35498	V	944	E	Disease
1272	NaV	SCN1A	P35498	V	982	L	Unclassified
1273	NaV	SCN1A	P35498	V	983	A	Disease
1274	NaV	SCN1A	P35498	W	1204	R	Disease
1275	NaV	SCN1A	P35498	W	1204	S	Disease
1276	NaV	SCN1A	P35498	W	1284	S	Disease
1277	NaV	SCN1A	P35498	W	1358	R	Disease
1278	NaV	SCN1A	P35498	W	1358	S	Disease
1279	NaV	SCN1A	P35498	W	1434	R	Disease
1280	NaV	SCN1A	P35498	W	1726	R	Disease
1281	NaV	SCN1A	P35498	W	1812	G	Disease
1282	NaV	SCN1A	P35498	W	1812	S	Disease
1283	NaV	SCN1A	P35498	W	190	R	Disease
1284	NaV	SCN1A	P35498	W	280	C	Disease
1285	NaV	SCN1A	P35498	W	280	R	Disease
1286	NaV	SCN1A	P35498	W	384	R	Disease
1287	NaV	SCN1A	P35498	W	932	C	Disease
1288	NaV	SCN1A	P35498	W	952	G	Disease
1289	NaV	SCN1A	P35498	W	957	L	Disease
1290	NaV	SCN1A	P35498	Y	1254	C	Disease
1291	NaV	SCN1A	P35498	Y	1422	C	Disease
1292	NaV	SCN1A	P35498	Y	1453	C	Disease
1293	NaV	SCN1A	P35498	Y	1462	C	Disease
1294	NaV	SCN1A	P35498	Y	1462	H	Disease
1295	NaV	SCN1A	P35498	Y	1684	D	Disease
1296	NaV	SCN1A	P35498	Y	1684	S	Disease
1297	NaV	SCN1A	P35498	Y	1694	C	Disease
1298	NaV	SCN1A	P35498	Y	1781	C	Disease
1299	NaV	SCN1A	P35498	Y	1781	H	Disease
1300	NaV	SCN1A	P35498	Y	388	H	Disease
1301	NaV	SCN1A	P35498	Y	413	N	Disease
1302	NaV	SCN1A	P35498	Y	426	C	Disease
1303	NaV	SCN1A	P35498	Y	426	N	Disease
1304	NaV	SCN1A	P35498	Y	790	C	Disease
1305	NaV	SCN1A	P35498	Y	790	F	Disease
1306	NaV	SCN1A	P35498	Y	84	C	Disease
1307	NaV	SCN2A	Q99250	A	1316	V	Disease
1308	NaV	SCN2A	Q99250	A	240	S	Disease
1309	NaV	SCN2A	Q99250	A	263	T	Disease
1310	NaV	SCN2A	Q99250	A	263	V	Disease
1311	NaV	SCN2A	Q99250	A	575	V	Polymorphism
1312	NaV	SCN2A	Q99250	A	896	V	Disease
1313	NaV	SCN2A	Q99250	C	1344	Y	Disease
1314	NaV	SCN2A	Q99250	C	1386	R	Disease
1315	NaV	SCN2A	Q99250	D	12	N	Disease
1316	NaV	SCN2A	Q99250	D	1823	A	Unclassified
1317	NaV	SCN2A	Q99250	D	322	N	Unclassified
1318	NaV	SCN2A	Q99250	D	649	N	Unclassified
1319	NaV	SCN2A	Q99250	D	82	G	Disease
1320	NaV	SCN2A	Q99250	E	1211	K	Disease
1321	NaV	SCN2A	Q99250	E	1321	K	Unclassified
1322	NaV	SCN2A	Q99250	E	169	G	Disease
1323	NaV	SCN2A	Q99250	E	430	G	Disease
1324	NaV	SCN2A	Q99250	E	430	Q	Unclassified
1325	NaV	SCN2A	Q99250	E	999	K	Disease
1326	NaV	SCN2A	Q99250	E	999	V	Disease
1327	NaV	SCN2A	Q99250	F	328	V	Unclassified
1328	NaV	SCN2A	Q99250	F	385	Y	Polymorphism
1329	NaV	SCN2A	Q99250	F	928	C	Disease
1330	NaV	SCN2A	Q99250	G	1372	R	Unclassified
1331	NaV	SCN2A	Q99250	G	1522	A	Unclassified
1332	NaV	SCN2A	Q99250	G	1593	R	Disease
1333	NaV	SCN2A	Q99250	G	1634	V	Disease
1334	NaV	SCN2A	Q99250	G	1744	R	Disease
1335	NaV	SCN2A	Q99250	G	211	D	Disease
1336	NaV	SCN2A	Q99250	H	1853	R	Disease
1337	NaV	SCN2A	Q99250	I	1473	M	Disease
1338	NaV	SCN2A	Q99250	I	1596	S	Unclassified
1339	NaV	SCN2A	Q99250	I	172	V	Unclassified
1340	NaV	SCN2A	Q99250	I	873	M	Disease
1341	NaV	SCN2A	Q99250	K	1260	E	Disease
1342	NaV	SCN2A	Q99250	K	1260	Q	Disease
1343	NaV	SCN2A	Q99250	K	1422	E	Disease
1344	NaV	SCN2A	Q99250	K	1641	N	Unclassified
1345	NaV	SCN2A	Q99250	K	905	N	Disease
1346	NaV	SCN2A	Q99250	K	908	R	Unclassified
1347	NaV	SCN2A	Q99250	L	1003	I	Disease
1348	NaV	SCN2A	Q99250	L	1330	F	Disease
1349	NaV	SCN2A	Q99250	L	1342	P	Disease
1350	NaV	SCN2A	Q99250	L	1563	V	Disease
1351	NaV	SCN2A	Q99250	L	1650	P	Disease
1352	NaV	SCN2A	Q99250	L	1660	W	Disease
1353	NaV	SCN2A	Q99250	L	1829	F	Disease
1354	NaV	SCN2A	Q99250	M	1128	T	Unclassified
1355	NaV	SCN2A	Q99250	M	1323	V	Disease
1356	NaV	SCN2A	Q99250	M	1338	T	Disease
1357	NaV	SCN2A	Q99250	M	136	I	Disease
1358	NaV	SCN2A	Q99250	M	1548	T	Disease
1359	NaV	SCN2A	Q99250	M	1559	V	Unclassified
1360	NaV	SCN2A	Q99250	M	252	V	Disease
1361	NaV	SCN2A	Q99250	N	1001	K	Disease
1362	NaV	SCN2A	Q99250	N	132	K	Disease
1363	NaV	SCN2A	Q99250	N	212	D	Disease
1364	NaV	SCN2A	Q99250	N	876	T	Disease
1365	NaV	SCN2A	Q99250	N	976	K	Unclassified
1366	NaV	SCN2A	Q99250	Q	1479	P	Disease
1367	NaV	SCN2A	Q99250	Q	1531	K	Unclassified
1368	NaV	SCN2A	Q99250	R	1312	T	Disease
1369	NaV	SCN2A	Q99250	R	1319	Q	Disease
1370	NaV	SCN2A	Q99250	R	1629	L	Disease
1371	NaV	SCN2A	Q99250	R	188	W	Disease
1372	NaV	SCN2A	Q99250	R	1882	G	Disease
1373	NaV	SCN2A	Q99250	R	1882	L	Disease
1374	NaV	SCN2A	Q99250	R	1882	Q	Disease
1375	NaV	SCN2A	Q99250	R	19	K	Polymorphism
1376	NaV	SCN2A	Q99250	R	1902	T	Unclassified
1377	NaV	SCN2A	Q99250	R	1918	H	Polymorphism
1378	NaV	SCN2A	Q99250	R	220	G	Disease
1379	NaV	SCN2A	Q99250	R	223	Q	Disease
1380	NaV	SCN2A	Q99250	R	379	H	Disease
1381	NaV	SCN2A	Q99250	R	524	Q	Polymorphism
1382	NaV	SCN2A	Q99250	R	850	P	Unclassified
1383	NaV	SCN2A	Q99250	R	853	Q	Disease
1384	NaV	SCN2A	Q99250	R	856	L	Disease
1385	NaV	SCN2A	Q99250	R	937	C	Disease
1386	NaV	SCN2A	Q99250	R	937	H	Disease
1387	NaV	SCN2A	Q99250	S	1336	Y	Disease
1388	NaV	SCN2A	Q99250	S	987	I	Disease
1389	NaV	SCN2A	Q99250	T	1420	M	Disease
1390	NaV	SCN2A	Q99250	T	1623	N	Disease
1391	NaV	SCN2A	Q99250	T	218	K	Unclassified
1392	NaV	SCN2A	Q99250	T	236	S	Disease
1393	NaV	SCN2A	Q99250	T	674	K	Disease
1394	NaV	SCN2A	Q99250	V	1282	F	Unclassified
1395	NaV	SCN2A	Q99250	V	1326	D	Disease
1396	NaV	SCN2A	Q99250	V	1326	L	Disease
1397	NaV	SCN2A	Q99250	V	208	E	Disease
1398	NaV	SCN2A	Q99250	V	213	D	Disease
1399	NaV	SCN2A	Q99250	V	251	I	Disease
1400	NaV	SCN2A	Q99250	V	261	M	Disease
1401	NaV	SCN2A	Q99250	V	892	I	Disease
1402	NaV	SCN2A	Q99250	W	191	G	Disease
1403	NaV	SCN2A	Q99250	Y	1589	C	Disease
1404	NaV	SCN3A	Q9NY46	D	1803	N	Polymorphism
1405	NaV	SCN3A	Q9NY46	D	815	N	Unclassified
1406	NaV	SCN3A	Q9NY46	E	1160	K	Disease
1407	NaV	SCN3A	Q9NY46	I	875	T	Disease
1408	NaV	SCN3A	Q9NY46	K	1799	Q	Unclassified
1409	NaV	SCN3A	Q9NY46	L	1813	S	Polymorphism
1410	NaV	SCN3A	Q9NY46	L	247	P	Disease
1411	NaV	SCN3A	Q9NY46	M	1372	V	Unclassified
1412	NaV	SCN3A	Q9NY46	P	1333	L	Disease
1413	NaV	SCN3A	Q9NY46	R	1642	C	Unclassified
1414	NaV	SCN3A	Q9NY46	R	357	Q	Disease
1415	NaV	SCN3A	Q9NY46	S	606	T	Polymorphism
1416	NaV	SCN3A	Q9NY46	V	1084	I	Polymorphism
1417	NaV	SCN3A	Q9NY46	V	1107	A	Polymorphism
1418	NaV	SCN3A	Q9NY46	V	1769	A	Disease
1419	NaV	SCN4A	P35499	A	1152	D	Disease
1420	NaV	SCN4A	P35499	A	1156	T	Disease
1421	NaV	SCN4A	P35499	A	1481	D	Disease
1422	NaV	SCN4A	P35499	A	715	T	Disease
1423	NaV	SCN4A	P35499	A	861	D	Polymorphism
1424	NaV	SCN4A	P35499	C	1209	F	Disease
1425	NaV	SCN4A	P35499	D	1069	N	Disease
1426	NaV	SCN4A	P35499	E	452	K	Disease
1427	NaV	SCN4A	P35499	F	1290	L	Disease
1428	NaV	SCN4A	P35499	F	1473	S	Disease
1429	NaV	SCN4A	P35499	F	1705	I	Disease
1430	NaV	SCN4A	P35499	F	671	S	Disease
1431	NaV	SCN4A	P35499	G	1306	A	Disease
1432	NaV	SCN4A	P35499	G	1306	E	Disease
1433	NaV	SCN4A	P35499	G	1306	V	Disease
1434	NaV	SCN4A	P35499	G	1456	E	Disease
1435	NaV	SCN4A	P35499	I	1160	V	Disease
1436	NaV	SCN4A	P35499	I	1310	N	Disease
1437	NaV	SCN4A	P35499	I	141	V	Disease
1438	NaV	SCN4A	P35499	I	693	T	Disease
1439	NaV	SCN4A	P35499	L	1433	R	Disease
1440	NaV	SCN4A	P35499	L	1436	P	Disease
1441	NaV	SCN4A	P35499	M	135	V	Polymorphism
1442	NaV	SCN4A	P35499	M	1476	I	Disease
1443	NaV	SCN4A	P35499	M	1592	V	Disease
1444	NaV	SCN4A	P35499	M	203	K	Disease
1445	NaV	SCN4A	P35499	N	1297	K	Disease
1446	NaV	SCN4A	P35499	N	1376	D	Polymorphism
1447	NaV	SCN4A	P35499	N	559	D	Polymorphism
1448	NaV	SCN4A	P35499	P	1158	S	Disease
1449	NaV	SCN4A	P35499	P	382	T	Disease
1450	NaV	SCN4A	P35499	P	72	L	Unclassified
1451	NaV	SCN4A	P35499	Q	1633	E	Disease
1452	NaV	SCN4A	P35499	Q	270	K	Disease
1453	NaV	SCN4A	P35499	R	104	H	Disease
1454	NaV	SCN4A	P35499	R	1129	Q	Disease
1455	NaV	SCN4A	P35499	R	1132	Q	Disease
1456	NaV	SCN4A	P35499	R	1135	C	Disease
1457	NaV	SCN4A	P35499	R	1135	H	Disease
1458	NaV	SCN4A	P35499	R	1448	C	Disease
1459	NaV	SCN4A	P35499	R	1448	H	Disease
1460	NaV	SCN4A	P35499	R	1448	L	Disease
1461	NaV	SCN4A	P35499	R	1454	W	Disease
1462	NaV	SCN4A	P35499	R	1457	H	Disease
1463	NaV	SCN4A	P35499	R	222	W	Disease
1464	NaV	SCN4A	P35499	R	225	W	Disease
1465	NaV	SCN4A	P35499	R	669	H	Disease
1466	NaV	SCN4A	P35499	R	672	C	Disease
1467	NaV	SCN4A	P35499	R	672	G	Disease
1468	NaV	SCN4A	P35499	R	672	H	Disease
1469	NaV	SCN4A	P35499	R	672	S	Disease
1470	NaV	SCN4A	P35499	R	675	G	Disease
1471	NaV	SCN4A	P35499	R	675	Q	Disease
1472	NaV	SCN4A	P35499	R	675	W	Disease
1473	NaV	SCN4A	P35499	S	246	L	Polymorphism
1474	NaV	SCN4A	P35499	S	524	G	Polymorphism
1475	NaV	SCN4A	P35499	S	804	F	Disease
1476	NaV	SCN4A	P35499	S	804	N	Disease
1477	NaV	SCN4A	P35499	T	1313	M	Disease
1478	NaV	SCN4A	P35499	T	704	M	Disease
1479	NaV	SCN4A	P35499	V	1293	I	Disease
1480	NaV	SCN4A	P35499	V	1442	E	Disease
1481	NaV	SCN4A	P35499	V	1589	M	Disease
1482	NaV	SCN4A	P35499	V	445	M	Disease
1483	NaV	SCN4A	P35499	V	781	I	Polymorphism
1484	NaV	SCN5A	Q14524	A	1100	V	Unclassified
1485	NaV	SCN5A	Q14524	A	1113	V	Unclassified
1486	NaV	SCN5A	Q14524	A	1180	V	Polymorphism
1487	NaV	SCN5A	Q14524	A	1288	G	Unclassified
1488	NaV	SCN5A	Q14524	A	1326	S	Unclassified
1489	NaV	SCN5A	Q14524	A	1330	P	Disease
1490	NaV	SCN5A	Q14524	A	1330	T	Disease
1491	NaV	SCN5A	Q14524	A	1427	S	Unclassified
1492	NaV	SCN5A	Q14524	A	1428	V	Unclassified
1493	NaV	SCN5A	Q14524	A	1569	P	Disease
1494	NaV	SCN5A	Q14524	A	1649	V	Disease
1495	NaV	SCN5A	Q14524	A	1680	T	Unclassified
1496	NaV	SCN5A	Q14524	A	1698	T	Unclassified
1497	NaV	SCN5A	Q14524	A	178	G	Unclassified
1498	NaV	SCN5A	Q14524	A	185	V	Unclassified
1499	NaV	SCN5A	Q14524	A	1924	T	Disease
1500	NaV	SCN5A	Q14524	A	1949	S	Disease
1501	NaV	SCN5A	Q14524	A	204	V	Unclassified
1502	NaV	SCN5A	Q14524	A	226	V	Disease
1503	NaV	SCN5A	Q14524	A	286	S	Polymorphism
1504	NaV	SCN5A	Q14524	A	413	E	Unclassified
1505	NaV	SCN5A	Q14524	A	413	T	Unclassified
1506	NaV	SCN5A	Q14524	A	447	G	Polymorphism
1507	NaV	SCN5A	Q14524	A	572	D	Disease
1508	NaV	SCN5A	Q14524	A	572	S	Unclassified
1509	NaV	SCN5A	Q14524	A	572	V	Unclassified
1510	NaV	SCN5A	Q14524	A	647	D	Unclassified
1511	NaV	SCN5A	Q14524	A	672	T	Polymorphism
1512	NaV	SCN5A	Q14524	A	735	E	Disease
1513	NaV	SCN5A	Q14524	A	735	V	Disease
1514	NaV	SCN5A	Q14524	A	997	S	Disease
1515	NaV	SCN5A	Q14524	A	997	T	Unclassified
1516	NaV	SCN5A	Q14524	C	1004	R	Unclassified
1517	NaV	SCN5A	Q14524	C	1363	Y	Unclassified
1518	NaV	SCN5A	Q14524	C	1728	R	Unclassified
1519	NaV	SCN5A	Q14524	C	1728	W	Unclassified
1520	NaV	SCN5A	Q14524	C	182	R	Unclassified
1521	NaV	SCN5A	Q14524	C	1850	S	Disease
1522	NaV	SCN5A	Q14524	C	683	G	Unclassified
1523	NaV	SCN5A	Q14524	C	896	S	Disease
1524	NaV	SCN5A	Q14524	C	915	R	Unclassified
1525	NaV	SCN5A	Q14524	C	981	F	Unclassified
1526	NaV	SCN5A	Q14524	D	1041	N	Polymorphism
1527	NaV	SCN5A	Q14524	D	1055	G	Unclassified
1528	NaV	SCN5A	Q14524	D	1114	N	Disease
1529	NaV	SCN5A	Q14524	D	1166	N	Unclassified
1530	NaV	SCN5A	Q14524	D	1243	N	Unclassified
1531	NaV	SCN5A	Q14524	D	1275	N	Disease
1532	NaV	SCN5A	Q14524	D	1595	N	Disease
1533	NaV	SCN5A	Q14524	D	1690	N	Disease
1534	NaV	SCN5A	Q14524	D	1714	G	Disease
1535	NaV	SCN5A	Q14524	D	1790	G	Disease
1536	NaV	SCN5A	Q14524	D	1792	N	Disease
1537	NaV	SCN5A	Q14524	D	1819	N	Disease
1538	NaV	SCN5A	Q14524	D	1839	G	Disease
1539	NaV	SCN5A	Q14524	D	356	N	Disease
1540	NaV	SCN5A	Q14524	D	501	G	Unclassified
1541	NaV	SCN5A	Q14524	D	596	G	Polymorphism
1542	NaV	SCN5A	Q14524	D	772	N	Disease
1543	NaV	SCN5A	Q14524	D	84	N	Unclassified
1544	NaV	SCN5A	Q14524	E	1053	K	Disease
1545	NaV	SCN5A	Q14524	E	1107	K	Polymorphism
1546	NaV	SCN5A	Q14524	E	1225	K	Disease
1547	NaV	SCN5A	Q14524	E	1231	K	Disease
1548	NaV	SCN5A	Q14524	E	1240	Q	Disease
1549	NaV	SCN5A	Q14524	E	1253	G	Unclassified
1550	NaV	SCN5A	Q14524	E	1295	K	Disease
1551	NaV	SCN5A	Q14524	E	1441	Q	Unclassified
1552	NaV	SCN5A	Q14524	E	1489	D	Unclassified
1553	NaV	SCN5A	Q14524	E	1548	K	Unclassified
1554	NaV	SCN5A	Q14524	E	1574	K	Unclassified
1555	NaV	SCN5A	Q14524	E	161	K	Disease
1556	NaV	SCN5A	Q14524	E	161	Q	Unclassified
1557	NaV	SCN5A	Q14524	E	1784	K	Disease
1558	NaV	SCN5A	Q14524	E	1901	K	Polymorphism
1559	NaV	SCN5A	Q14524	E	1901	Q	Unclassified
1560	NaV	SCN5A	Q14524	E	1938	K	Unclassified
1561	NaV	SCN5A	Q14524	E	30	G	Unclassified
1562	NaV	SCN5A	Q14524	E	428	K	Disease
1563	NaV	SCN5A	Q14524	E	439	K	Unclassified
1564	NaV	SCN5A	Q14524	E	462	A	Unclassified
1565	NaV	SCN5A	Q14524	E	462	K	Disease
1566	NaV	SCN5A	Q14524	E	48	K	Unclassified
1567	NaV	SCN5A	Q14524	E	654	K	Unclassified
1568	NaV	SCN5A	Q14524	E	655	K	Disease
1569	NaV	SCN5A	Q14524	E	746	K	Unclassified
1570	NaV	SCN5A	Q14524	E	867	Q	Unclassified
1571	NaV	SCN5A	Q14524	E	901	K	Unclassified
1572	NaV	SCN5A	Q14524	F	1250	L	Disease
1573	NaV	SCN5A	Q14524	F	1293	S	Unclassified
1574	NaV	SCN5A	Q14524	F	1344	L	Unclassified
1575	NaV	SCN5A	Q14524	F	1344	S	Disease
1576	NaV	SCN5A	Q14524	F	1360	C	Unclassified
1577	NaV	SCN5A	Q14524	F	1473	C	Disease
1578	NaV	SCN5A	Q14524	F	1486	L	Disease
1579	NaV	SCN5A	Q14524	F	1571	C	Unclassified
1580	NaV	SCN5A	Q14524	F	1594	S	Unclassified
1581	NaV	SCN5A	Q14524	F	1596	I	Unclassified
1582	NaV	SCN5A	Q14524	F	1705	S	Disease
1583	NaV	SCN5A	Q14524	F	2004	L	Disease
1584	NaV	SCN5A	Q14524	F	2004	V	Disease
1585	NaV	SCN5A	Q14524	F	530	V	Unclassified
1586	NaV	SCN5A	Q14524	F	532	C	Disease
1587	NaV	SCN5A	Q14524	F	543	L	Unclassified
1588	NaV	SCN5A	Q14524	F	816	Y	Unclassified
1589	NaV	SCN5A	Q14524	F	851	L	Disease
1590	NaV	SCN5A	Q14524	F	892	I	Disease
1591	NaV	SCN5A	Q14524	F	93	S	Unclassified
1592	NaV	SCN5A	Q14524	G	1040	R	Polymorphism
1593	NaV	SCN5A	Q14524	G	1084	S	Disease
1594	NaV	SCN5A	Q14524	G	1262	S	Unclassified
1595	NaV	SCN5A	Q14524	G	1319	V	Disease
1596	NaV	SCN5A	Q14524	G	1358	W	Unclassified
1597	NaV	SCN5A	Q14524	G	1406	E	Unclassified
1598	NaV	SCN5A	Q14524	G	1406	R	Disease
1599	NaV	SCN5A	Q14524	G	1408	R	Disease
1600	NaV	SCN5A	Q14524	G	1420	R	Unclassified
1601	NaV	SCN5A	Q14524	G	1433	V	Unclassified
1602	NaV	SCN5A	Q14524	G	1481	E	Disease
1603	NaV	SCN5A	Q14524	G	1502	S	Disease
1604	NaV	SCN5A	Q14524	G	1642	E	Unclassified
1605	NaV	SCN5A	Q14524	G	1661	R	Unclassified
1606	NaV	SCN5A	Q14524	G	1712	S	Unclassified
1607	NaV	SCN5A	Q14524	G	1740	R	Disease
1608	NaV	SCN5A	Q14524	G	1743	E	Disease
1609	NaV	SCN5A	Q14524	G	1743	R	Disease
1610	NaV	SCN5A	Q14524	G	1748	D	Disease
1611	NaV	SCN5A	Q14524	G	1935	S	Unclassified
1612	NaV	SCN5A	Q14524	G	289	S	Unclassified
1613	NaV	SCN5A	Q14524	G	298	S	Disease
1614	NaV	SCN5A	Q14524	G	319	S	Disease
1615	NaV	SCN5A	Q14524	G	351	D	Unclassified
1616	NaV	SCN5A	Q14524	G	351	V	Disease
1617	NaV	SCN5A	Q14524	G	386	E	Unclassified
1618	NaV	SCN5A	Q14524	G	386	R	Unclassified
1619	NaV	SCN5A	Q14524	G	514	C	Disease
1620	NaV	SCN5A	Q14524	G	552	R	Disease
1621	NaV	SCN5A	Q14524	G	579	R	Unclassified
1622	NaV	SCN5A	Q14524	G	615	E	Disease
1623	NaV	SCN5A	Q14524	G	638	D	Polymorphism
1624	NaV	SCN5A	Q14524	G	639	R	Disease
1625	NaV	SCN5A	Q14524	G	752	R	Disease
1626	NaV	SCN5A	Q14524	G	758	E	Unclassified
1627	NaV	SCN5A	Q14524	G	9	V	Disease
1628	NaV	SCN5A	Q14524	H	1849	R	Disease
1629	NaV	SCN5A	Q14524	H	278	D	Unclassified
1630	NaV	SCN5A	Q14524	H	445	D	Disease
1631	NaV	SCN5A	Q14524	H	558	R	Polymorphism
1632	NaV	SCN5A	Q14524	H	681	P	Disease
1633	NaV	SCN5A	Q14524	H	886	P	Unclassified
1634	NaV	SCN5A	Q14524	I	1334	V	Unclassified
1635	NaV	SCN5A	Q14524	I	1448	L	Unclassified
1636	NaV	SCN5A	Q14524	I	1448	T	Unclassified
1637	NaV	SCN5A	Q14524	I	1521	K	Unclassified
1638	NaV	SCN5A	Q14524	I	1593	M	Unclassified
1639	NaV	SCN5A	Q14524	I	1660	V	Disease
1640	NaV	SCN5A	Q14524	I	1768	V	Disease
1641	NaV	SCN5A	Q14524	I	1836	T	Polymorphism
1642	NaV	SCN5A	Q14524	I	1968	M	Polymorphism
1643	NaV	SCN5A	Q14524	I	1968	S	Disease
1644	NaV	SCN5A	Q14524	I	230	V	Disease
1645	NaV	SCN5A	Q14524	I	397	T	Unclassified
1646	NaV	SCN5A	Q14524	I	848	F	Unclassified
1647	NaV	SCN5A	Q14524	I	94	S	Unclassified
1648	NaV	SCN5A	Q14524	K	1236	N	Disease
1649	NaV	SCN5A	Q14524	K	126	E	Disease
1650	NaV	SCN5A	Q14524	K	1359	N	Unclassified
1651	NaV	SCN5A	Q14524	K	1419	E	Unclassified
1652	NaV	SCN5A	Q14524	K	1493	R	Unclassified
1653	NaV	SCN5A	Q14524	K	1500	N	Polymorphism
1654	NaV	SCN5A	Q14524	K	1505	N	Unclassified
1655	NaV	SCN5A	Q14524	K	1527	R	Disease
1656	NaV	SCN5A	Q14524	K	175	N	Unclassified
1657	NaV	SCN5A	Q14524	K	1872	N	Unclassified
1658	NaV	SCN5A	Q14524	K	817	E	Disease
1659	NaV	SCN5A	Q14524	L	1239	P	Unclassified
1660	NaV	SCN5A	Q14524	L	1283	M	Unclassified
1661	NaV	SCN5A	Q14524	L	1308	F	Polymorphism
1662	NaV	SCN5A	Q14524	L	1311	P	Unclassified
1663	NaV	SCN5A	Q14524	L	1338	V	Unclassified
1664	NaV	SCN5A	Q14524	L	1346	I	Unclassified
1665	NaV	SCN5A	Q14524	L	1346	P	Unclassified
1666	NaV	SCN5A	Q14524	L	136	P	Unclassified
1667	NaV	SCN5A	Q14524	L	1412	F	Unclassified
1668	NaV	SCN5A	Q14524	L	1501	V	Disease
1669	NaV	SCN5A	Q14524	L	1560	F	Unclassified
1670	NaV	SCN5A	Q14524	L	1582	P	Unclassified
1671	NaV	SCN5A	Q14524	L	1650	F	Unclassified
1672	NaV	SCN5A	Q14524	L	1761	F	Unclassified
1673	NaV	SCN5A	Q14524	L	1761	H	Unclassified
1674	NaV	SCN5A	Q14524	L	1825	P	Disease
1675	NaV	SCN5A	Q14524	L	212	P	Disease
1676	NaV	SCN5A	Q14524	L	212	Q	Unclassified
1677	NaV	SCN5A	Q14524	L	276	Q	Unclassified
1678	NaV	SCN5A	Q14524	L	299	M	Polymorphism
1679	NaV	SCN5A	Q14524	L	315	P	Unclassified
1680	NaV	SCN5A	Q14524	L	325	R	Unclassified
1681	NaV	SCN5A	Q14524	L	404	Q	Disease
1682	NaV	SCN5A	Q14524	L	409	V	Unclassified
1683	NaV	SCN5A	Q14524	L	461	V	Polymorphism
1684	NaV	SCN5A	Q14524	L	567	Q	Disease
1685	NaV	SCN5A	Q14524	L	618	F	Unclassified
1686	NaV	SCN5A	Q14524	L	619	F	Disease
1687	NaV	SCN5A	Q14524	L	673	P	Unclassified
1688	NaV	SCN5A	Q14524	L	812	Q	Disease
1689	NaV	SCN5A	Q14524	L	839	P	Unclassified
1690	NaV	SCN5A	Q14524	L	917	R	Unclassified
1691	NaV	SCN5A	Q14524	L	928	P	Unclassified
1692	NaV	SCN5A	Q14524	L	935	P	Unclassified
1693	NaV	SCN5A	Q14524	M	1351	R	Unclassified
1694	NaV	SCN5A	Q14524	M	138	I	Disease
1695	NaV	SCN5A	Q14524	M	1487	L	Unclassified
1696	NaV	SCN5A	Q14524	M	1498	T	Unclassified
1697	NaV	SCN5A	Q14524	M	1498	V	Unclassified
1698	NaV	SCN5A	Q14524	M	1652	R	Disease
1699	NaV	SCN5A	Q14524	M	1652	T	Unclassified
1700	NaV	SCN5A	Q14524	M	1766	L	Disease
1701	NaV	SCN5A	Q14524	M	1875	T	Polymorphism
1702	NaV	SCN5A	Q14524	M	369	K	Disease
1703	NaV	SCN5A	Q14524	M	764	R	Unclassified
1704	NaV	SCN5A	Q14524	N	109	K	Unclassified
1705	NaV	SCN5A	Q14524	N	1325	S	Disease
1706	NaV	SCN5A	Q14524	N	1463	Y	Unclassified
1707	NaV	SCN5A	Q14524	N	1472	S	Unclassified
1708	NaV	SCN5A	Q14524	N	1722	D	Unclassified
1709	NaV	SCN5A	Q14524	N	1987	K	Disease
1710	NaV	SCN5A	Q14524	N	275	K	Unclassified
1711	NaV	SCN5A	Q14524	N	291	S	Polymorphism
1712	NaV	SCN5A	Q14524	N	406	K	Disease
1713	NaV	SCN5A	Q14524	N	406	S	Disease
1714	NaV	SCN5A	Q14524	N	470	K	Disease
1715	NaV	SCN5A	Q14524	N	592	K	Polymorphism
1716	NaV	SCN5A	Q14524	N	70	K	Unclassified
1717	NaV	SCN5A	Q14524	N	927	S	Unclassified
1718	NaV	SCN5A	Q14524	P	1090	L	Polymorphism
1719	NaV	SCN5A	Q14524	P	1298	L	Disease
1720	NaV	SCN5A	Q14524	P	1332	L	Unclassified
1721	NaV	SCN5A	Q14524	P	1438	L	Unclassified
1722	NaV	SCN5A	Q14524	P	1962	L	Polymorphism
1723	NaV	SCN5A	Q14524	P	2006	A	Unclassified
1724	NaV	SCN5A	Q14524	P	336	L	Disease
1725	NaV	SCN5A	Q14524	P	52	S	Unclassified
1726	NaV	SCN5A	Q14524	P	637	L	Disease
1727	NaV	SCN5A	Q14524	P	640	A	Unclassified
1728	NaV	SCN5A	Q14524	P	648	L	Disease
1729	NaV	SCN5A	Q14524	P	656	L	Polymorphism
1730	NaV	SCN5A	Q14524	P	701	L	Disease
1731	NaV	SCN5A	Q14524	P	717	L	Unclassified
1732	NaV	SCN5A	Q14524	P	773	S	Unclassified
1733	NaV	SCN5A	Q14524	Q	1613	L	Unclassified
1734	NaV	SCN5A	Q14524	Q	1832	E	Unclassified
1735	NaV	SCN5A	Q14524	Q	1909	R	Disease
1736	NaV	SCN5A	Q14524	Q	245	K	Disease
1737	NaV	SCN5A	Q14524	Q	270	K	Unclassified
1738	NaV	SCN5A	Q14524	Q	573	E	Unclassified
1739	NaV	SCN5A	Q14524	Q	692	K	Polymorphism
1740	NaV	SCN5A	Q14524	Q	750	R	Unclassified
1741	NaV	SCN5A	Q14524	Q	960	K	Unclassified
1742	NaV	SCN5A	Q14524	R	1023	H	Disease
1743	NaV	SCN5A	Q14524	R	1027	Q	Polymorphism
1744	NaV	SCN5A	Q14524	R	104	G	Unclassified
1745	NaV	SCN5A	Q14524	R	104	Q	Unclassified
1746	NaV	SCN5A	Q14524	R	104	W	Unclassified
1747	NaV	SCN5A	Q14524	R	1116	W	Polymorphism
1748	NaV	SCN5A	Q14524	R	1193	Q	Disease
1749	NaV	SCN5A	Q14524	R	121	Q	Unclassified
1750	NaV	SCN5A	Q14524	R	121	W	Unclassified
1751	NaV	SCN5A	Q14524	R	1232	Q	Unclassified
1752	NaV	SCN5A	Q14524	R	1232	W	Disease
1753	NaV	SCN5A	Q14524	R	1432	G	Unclassified
1754	NaV	SCN5A	Q14524	R	1432	S	Disease
1755	NaV	SCN5A	Q14524	R	1512	W	Disease
1756	NaV	SCN5A	Q14524	R	1583	C	Unclassified
1757	NaV	SCN5A	Q14524	R	1583	H	Unclassified
1758	NaV	SCN5A	Q14524	R	1623	L	Disease
1759	NaV	SCN5A	Q14524	R	1623	Q	Disease
1760	NaV	SCN5A	Q14524	R	1626	H	Unclassified
1761	NaV	SCN5A	Q14524	R	1626	P	Unclassified
1762	NaV	SCN5A	Q14524	R	1629	Q	Disease
1763	NaV	SCN5A	Q14524	R	1644	C	Disease
1764	NaV	SCN5A	Q14524	R	1644	H	Disease
1765	NaV	SCN5A	Q14524	R	1739	W	Unclassified
1766	NaV	SCN5A	Q14524	R	18	Q	Unclassified
1767	NaV	SCN5A	Q14524	R	18	W	Unclassified
1768	NaV	SCN5A	Q14524	R	1826	C	Disease
1769	NaV	SCN5A	Q14524	R	1826	H	Disease
1770	NaV	SCN5A	Q14524	R	1897	W	Unclassified
1771	NaV	SCN5A	Q14524	R	1913	H	Unclassified
1772	NaV	SCN5A	Q14524	R	1919	C	Polymorphism
1773	NaV	SCN5A	Q14524	R	1958	Q	Unclassified
1774	NaV	SCN5A	Q14524	R	1991	Q	Polymorphism
1775	NaV	SCN5A	Q14524	R	2012	C	Unclassified
1776	NaV	SCN5A	Q14524	R	222	Q	Disease
1777	NaV	SCN5A	Q14524	R	225	Q	Disease
1778	NaV	SCN5A	Q14524	R	225	W	Disease
1779	NaV	SCN5A	Q14524	R	27	H	Disease
1780	NaV	SCN5A	Q14524	R	282	C	Unclassified
1781	NaV	SCN5A	Q14524	R	282	H	Disease
1782	NaV	SCN5A	Q14524	R	34	C	Polymorphism
1783	NaV	SCN5A	Q14524	R	34	H	Polymorphism
1784	NaV	SCN5A	Q14524	R	340	W	Unclassified
1785	NaV	SCN5A	Q14524	R	367	C	Disease
1786	NaV	SCN5A	Q14524	R	367	H	Disease
1787	NaV	SCN5A	Q14524	R	367	L	Unclassified
1788	NaV	SCN5A	Q14524	R	376	C	Polymorphism
1789	NaV	SCN5A	Q14524	R	376	H	Unclassified
1790	NaV	SCN5A	Q14524	R	43	Q	Disease
1791	NaV	SCN5A	Q14524	R	475	S	Polymorphism
1792	NaV	SCN5A	Q14524	R	481	W	Polymorphism
1793	NaV	SCN5A	Q14524	R	526	H	Unclassified
1794	NaV	SCN5A	Q14524	R	53	Q	Unclassified
1795	NaV	SCN5A	Q14524	R	535	Q	Unclassified
1796	NaV	SCN5A	Q14524	R	568	H	Polymorphism
1797	NaV	SCN5A	Q14524	R	569	W	Unclassified
1798	NaV	SCN5A	Q14524	R	620	C	Unclassified
1799	NaV	SCN5A	Q14524	R	661	W	Unclassified
1800	NaV	SCN5A	Q14524	R	680	H	Disease
1801	NaV	SCN5A	Q14524	R	689	C	Unclassified
1802	NaV	SCN5A	Q14524	R	689	H	Unclassified
1803	NaV	SCN5A	Q14524	R	808	P	Unclassified
1804	NaV	SCN5A	Q14524	R	814	Q	Disease
1805	NaV	SCN5A	Q14524	R	878	C	Disease
1806	NaV	SCN5A	Q14524	R	878	H	Unclassified
1807	NaV	SCN5A	Q14524	R	893	C	Unclassified
1808	NaV	SCN5A	Q14524	R	893	H	Unclassified
1809	NaV	SCN5A	Q14524	R	965	C	Disease
1810	NaV	SCN5A	Q14524	R	965	H	Unclassified
1811	NaV	SCN5A	Q14524	R	965	L	Unclassified
1812	NaV	SCN5A	Q14524	R	971	C	Disease
1813	NaV	SCN5A	Q14524	R	986	Q	Polymorphism
1814	NaV	SCN5A	Q14524	S	1079	Y	Unclassified
1815	NaV	SCN5A	Q14524	S	1103	Y	Polymorphism
1816	NaV	SCN5A	Q14524	S	1140	T	Unclassified
1817	NaV	SCN5A	Q14524	S	115	G	Unclassified
1818	NaV	SCN5A	Q14524	S	1219	N	Unclassified
1819	NaV	SCN5A	Q14524	S	1333	Y	Disease
1820	NaV	SCN5A	Q14524	S	1382	I	Disease
1821	NaV	SCN5A	Q14524	S	1458	Y	Disease
1822	NaV	SCN5A	Q14524	S	1609	W	Disease
1823	NaV	SCN5A	Q14524	S	1672	Y	Unclassified
1824	NaV	SCN5A	Q14524	S	1710	L	Disease
1825	NaV	SCN5A	Q14524	S	1787	N	Polymorphism
1826	NaV	SCN5A	Q14524	S	1904	L	Disease
1827	NaV	SCN5A	Q14524	S	216	L	Unclassified
1828	NaV	SCN5A	Q14524	S	524	Y	Polymorphism
1829	NaV	SCN5A	Q14524	S	571	I	Unclassified
1830	NaV	SCN5A	Q14524	S	705	F	Polymorphism
1831	NaV	SCN5A	Q14524	S	910	L	Disease
1832	NaV	SCN5A	Q14524	S	941	N	Disease
1833	NaV	SCN5A	Q14524	T	1016	M	Polymorphism
1834	NaV	SCN5A	Q14524	T	1069	M	Disease
1835	NaV	SCN5A	Q14524	T	1131	I	Disease
1836	NaV	SCN5A	Q14524	T	1304	M	Disease
1837	NaV	SCN5A	Q14524	T	1488	R	Unclassified
1838	NaV	SCN5A	Q14524	T	1620	K	Disease
1839	NaV	SCN5A	Q14524	T	1620	M	Disease
1840	NaV	SCN5A	Q14524	T	1645	M	Disease
1841	NaV	SCN5A	Q14524	T	1709	M	Unclassified
1842	NaV	SCN5A	Q14524	T	1709	R	Unclassified
1843	NaV	SCN5A	Q14524	T	1723	N	Unclassified
1844	NaV	SCN5A	Q14524	T	1779	M	Disease
1845	NaV	SCN5A	Q14524	T	187	I	Disease
1846	NaV	SCN5A	Q14524	T	220	I	Disease
1847	NaV	SCN5A	Q14524	T	320	N	Unclassified
1848	NaV	SCN5A	Q14524	T	353	I	Disease
1849	NaV	SCN5A	Q14524	T	370	M	Unclassified
1850	NaV	SCN5A	Q14524	T	449	A	Polymorphism
1851	NaV	SCN5A	Q14524	T	512	I	Disease
1852	NaV	SCN5A	Q14524	T	632	M	Unclassified
1853	NaV	SCN5A	Q14524	T	731	I	Unclassified
1854	NaV	SCN5A	Q14524	V	1082	A	Polymorphism
1855	NaV	SCN5A	Q14524	V	1098	L	Polymorphism
1856	NaV	SCN5A	Q14524	V	1249	D	Unclassified
1857	NaV	SCN5A	Q14524	V	125	L	Disease
1858	NaV	SCN5A	Q14524	V	1251	M	Polymorphism
1859	NaV	SCN5A	Q14524	V	1323	G	Unclassified
1860	NaV	SCN5A	Q14524	V	1353	M	Unclassified
1861	NaV	SCN5A	Q14524	V	1405	L	Disease
1862	NaV	SCN5A	Q14524	V	1405	M	Unclassified
1863	NaV	SCN5A	Q14524	V	1451	D	Unclassified
1864	NaV	SCN5A	Q14524	V	146	M	Unclassified
1865	NaV	SCN5A	Q14524	V	1468	F	Unclassified
1866	NaV	SCN5A	Q14524	V	1525	M	Unclassified
1867	NaV	SCN5A	Q14524	V	1532	I	Unclassified
1868	NaV	SCN5A	Q14524	V	1604	M	Unclassified
1869	NaV	SCN5A	Q14524	V	1667	I	Disease
1870	NaV	SCN5A	Q14524	V	1763	M	Disease
1871	NaV	SCN5A	Q14524	V	1764	F	Unclassified
1872	NaV	SCN5A	Q14524	V	1777	M	Disease
1873	NaV	SCN5A	Q14524	V	1861	I	Unclassified
1874	NaV	SCN5A	Q14524	V	1903	L	Unclassified
1875	NaV	SCN5A	Q14524	V	1951	L	Unclassified
1876	NaV	SCN5A	Q14524	V	1951	M	Disease
1877	NaV	SCN5A	Q14524	V	223	L	Unclassified
1878	NaV	SCN5A	Q14524	V	232	I	Unclassified
1879	NaV	SCN5A	Q14524	V	240	M	Disease
1880	NaV	SCN5A	Q14524	V	247	L	Unclassified
1881	NaV	SCN5A	Q14524	V	294	M	Disease
1882	NaV	SCN5A	Q14524	V	300	I	Unclassified
1883	NaV	SCN5A	Q14524	V	396	A	Unclassified
1884	NaV	SCN5A	Q14524	V	396	L	Unclassified
1885	NaV	SCN5A	Q14524	V	411	M	Disease
1886	NaV	SCN5A	Q14524	V	601	A	Polymorphism
1887	NaV	SCN5A	Q14524	V	789	I	Unclassified
1888	NaV	SCN5A	Q14524	V	924	I	Polymorphism
1889	NaV	SCN5A	Q14524	V	95	I	Disease
1890	NaV	SCN5A	Q14524	W	1271	C	Unclassified
1891	NaV	SCN5A	Q14524	W	374	G	Unclassified
1892	NaV	SCN5A	Q14524	Y	1199	S	Unclassified
1893	NaV	SCN5A	Q14524	Y	1228	H	Unclassified
1894	NaV	SCN5A	Q14524	Y	1409	C	Unclassified
1895	NaV	SCN5A	Q14524	Y	1449	C	Unclassified
1896	NaV	SCN5A	Q14524	Y	1494	N	Disease
1897	NaV	SCN5A	Q14524	Y	1495	S	Unclassified
1898	NaV	SCN5A	Q14524	Y	1767	C	Unclassified
1899	NaV	SCN5A	Q14524	Y	1795	C	Disease
1900	NaV	SCN5A	Q14524	Y	1795	H	Disease
1901	NaV	SCN5A	Q14524	Y	1977	N	Unclassified
1902	NaV	SCN8A	Q9UQD0	A	1323	S	Unclassified
1903	NaV	SCN8A	Q9UQD0	A	1650	T	Disease
1904	NaV	SCN8A	Q9UQD0	A	408	T	Unclassified
1905	NaV	SCN8A	Q9UQD0	A	890	T	Disease
1906	NaV	SCN8A	Q9UQD0	D	58	N	Unclassified
1907	NaV	SCN8A	Q9UQD0	E	1483	K	Disease
1908	NaV	SCN8A	Q9UQD0	E	479	V	Unclassified
1909	NaV	SCN8A	Q9UQD0	F	1754	S	Unclassified
1910	NaV	SCN8A	Q9UQD0	F	210	L	Disease
1911	NaV	SCN8A	Q9UQD0	F	260	S	Unclassified
1912	NaV	SCN8A	Q9UQD0	F	846	S	Disease
1913	NaV	SCN8A	Q9UQD0	G	1451	S	Disease
1914	NaV	SCN8A	Q9UQD0	G	1475	R	Disease
1915	NaV	SCN8A	Q9UQD0	I	1327	V	Disease
1916	NaV	SCN8A	Q9UQD0	I	1479	V	Unclassified
1917	NaV	SCN8A	Q9UQD0	I	1605	R	Unclassified
1918	NaV	SCN8A	Q9UQD0	L	1279	V	Disease
1919	NaV	SCN8A	Q9UQD0	L	1331	V	Unclassified
1920	NaV	SCN8A	Q9UQD0	L	1865	P	Unclassified
1921	NaV	SCN8A	Q9UQD0	L	407	F	Unclassified
1922	NaV	SCN8A	Q9UQD0	N	1466	K	Disease
1923	NaV	SCN8A	Q9UQD0	N	1466	T	Disease
1924	NaV	SCN8A	Q9UQD0	N	1768	D	Disease
1925	NaV	SCN8A	Q9UQD0	N	1877	S	Disease
1926	NaV	SCN8A	Q9UQD0	N	215	R	Unclassified
1927	NaV	SCN8A	Q9UQD0	N	307	S	Unclassified
1928	NaV	SCN8A	Q9UQD0	N	984	K	Disease
1929	NaV	SCN8A	Q9UQD0	Q	1801	E	Unclassified
1930	NaV	SCN8A	Q9UQD0	R	1617	Q	Disease
1931	NaV	SCN8A	Q9UQD0	R	1872	L	Disease
1932	NaV	SCN8A	Q9UQD0	R	1872	Q	Disease
1933	NaV	SCN8A	Q9UQD0	R	1872	W	Disease
1934	NaV	SCN8A	Q9UQD0	R	223	G	Disease
1935	NaV	SCN8A	Q9UQD0	R	662	C	Unclassified
1936	NaV	SCN8A	Q9UQD0	R	850	E	Disease
1937	NaV	SCN8A	Q9UQD0	R	850	Q	Unclassified
1938	NaV	SCN8A	Q9UQD0	S	1596	C	Unclassified
1939	NaV	SCN8A	Q9UQD0	S	232	P	Disease
1940	NaV	SCN8A	Q9UQD0	S	978	G	Disease
1941	NaV	SCN8A	Q9UQD0	T	767	I	Disease
1942	NaV	SCN8A	Q9UQD0	V	1592	L	Unclassified
1943	NaV	SCN8A	Q9UQD0	V	1598	A	Disease
1944	NaV	SCN8A	Q9UQD0	V	216	D	Disease
1945	NaV	SCN8A	Q9UQD0	V	410	L	Unclassified
1946	NaV	SCN8A	Q9UQD0	V	891	M	Disease
1947	NaV	SCN8A	Q9UQD0	V	960	D	Unclassified
1948	NaV	SCN9A	Q15858	A	1643	E	Disease
1949	NaV	SCN9A	Q15858	A	1643	T	Disease
1950	NaV	SCN9A	Q15858	C	710	Y	Polymorphism
1951	NaV	SCN9A	Q15858	D	1919	G	Polymorphism
1952	NaV	SCN9A	Q15858	E	1171	Q	Unclassified
1953	NaV	SCN9A	Q15858	E	406	K	Disease
1954	NaV	SCN9A	Q15858	E	519	K	Polymorphism
1955	NaV	SCN9A	Q15858	F	1460	V	Disease
1956	NaV	SCN9A	Q15858	F	1473	V	Disease
1957	NaV	SCN9A	Q15858	F	216	S	Disease
1958	NaV	SCN9A	Q15858	I	1472	T	Disease
1959	NaV	SCN9A	Q15858	I	228	M	Polymorphism
1960	NaV	SCN9A	Q15858	I	62	V	Disease
1961	NaV	SCN9A	Q15858	I	695	M	Polymorphism
1962	NaV	SCN9A	Q15858	I	750	V	Polymorphism
1963	NaV	SCN9A	Q15858	I	859	T	Disease
1964	NaV	SCN9A	Q15858	K	666	R	Disease
1965	NaV	SCN9A	Q15858	L	1134	F	Polymorphism
1966	NaV	SCN9A	Q15858	L	1278	V	Polymorphism
1967	NaV	SCN9A	Q15858	L	1623	P	Disease
1968	NaV	SCN9A	Q15858	L	869	F	Disease
1969	NaV	SCN9A	Q15858	L	869	H	Disease
1970	NaV	SCN9A	Q15858	M	1638	K	Disease
1971	NaV	SCN9A	Q15858	M	932	L	Polymorphism
1972	NaV	SCN9A	Q15858	M	943	L	Polymorphism
1973	NaV	SCN9A	Q15858	N	395	K	Disease
1974	NaV	SCN9A	Q15858	N	641	Y	Disease
1975	NaV	SCN9A	Q15858	P	149	Q	Disease
1976	NaV	SCN9A	Q15858	Q	10	R	Disease
1977	NaV	SCN9A	Q15858	R	1007	C	Disease
1978	NaV	SCN9A	Q15858	R	907	Q	Disease
1979	NaV	SCN9A	Q15858	S	241	T	Disease
1980	NaV	SCN9A	Q15858	S	490	N	Polymorphism
1981	NaV	SCN9A	Q15858	T	1475	I	Disease
1982	NaV	SCN9A	Q15858	V	1309	D	Disease
1983	NaV	SCN9A	Q15858	V	1309	F	Disease
1984	NaV	SCN9A	Q15858	V	1310	F	Disease
1985	NaV	SCN9A	Q15858	W	1161	R	Polymorphism

## Sheet: ClinVar
Table S3 (C): The dataset of missense SNPs located on KVs (1964 SNPs), CaVs (593SNPs) and NaVs (1732 SNPs) as isolated from ClinVar. This excel sheet named "ClinVar" contains all SNPs isolated from ClinVar (4289 SNPs). The excel sheet named "Full" contains a dataset of unique SNPs from both databases and the excel sheet "UniProt" contains SNPs isolated from UniProt (more details regarding the ass…
ClinVar Data set
#	Channel Type	Gene Name	AC	AA Before	Position	AA After	Status
1	CaV	CACNA1A	O00555	A	2436	T	Uncertain significance
2	CaV	CACNA1A	O00555	R	1672	P	Pathogenic
3	CaV	CACNA1B	Q00975	M	1516	I	Uncertain significance
4	CaV	CACNA1B	Q00975	R	1389	H	Pathogenic
5	CaV	CACNA1B	Q00975	S	1745	G	Uncertain significance
6	CaV	CACNA1B	Q00975	Y	59	H	Uncertain significance
7	CaV	CACNA1C	Q13936	L	614	P	Uncertain significance
8	CaV	CACNA1C	Q13936	R	24	H	Uncertain significance
9	CaV	CACNA1D	Q01668	G	403	R	Likely pathogenic
10	CaV	CACNA1D	Q01668	I	750	M	Pathogenic
11	CaV	CACNA1E	Q15878	A	702	T	Uncertain significance
12	CaV	CACNA1E	Q15878	F	698	S	Likely pathogenic
13	CaV	CACNA1E	Q15878	G	1430	R	Uncertain significance
14	CaV	CACNA1E	Q15878	G	690	D	Uncertain significance
15	CaV	CACNA1E	Q15878	R	879	W	Uncertain significance
16	CaV	CACNA1E	Q15878	S	851	G	Uncertain significance
17	CaV	CACNA1E	Q15878	V	2010	M	Uncertain significance
18	CaV	CACNA1F	O60840	A	547	T	Likely pathogenic
19	CaV	CACNA1F	O60840	C	1040	R	Likely benign
20	CaV	CACNA1F	O60840	D	1954	N	Uncertain significance
21	CaV	CACNA1F	O60840	E	1387	D	not provided
22	CaV	CACNA1F	O60840	G	1001	R	Uncertain significance
23	CaV	CACNA1F	O60840	G	1018	E	Likely pathogenic
24	CaV	CACNA1F	O60840	G	1405	S	Benign
25	CaV	CACNA1F	O60840	G	1684	W	Benign
26	CaV	CACNA1F	O60840	G	31	R	Uncertain significance
27	CaV	CACNA1F	O60840	G	369	D	Pathogenic
28	CaV	CACNA1F	O60840	G	826	V	Uncertain significance
29	CaV	CACNA1F	O60840	G	848	S	Pathogenic
30	CaV	CACNA1F	O60840	G	933	S	Uncertain significance
31	CaV	CACNA1F	O60840	H	638	Y	Uncertain significance
32	CaV	CACNA1F	O60840	I	656	F	Uncertain significance
33	CaV	CACNA1F	O60840	I	756	T	Pathogenic
34	CaV	CACNA1F	O60840	M	1	L	Uncertain significance
35	CaV	CACNA1F	O60840	N	1071	K	Likely pathogenic
36	CaV	CACNA1F	O60840	N	746	T	Likely benign
37	CaV	CACNA1F	O60840	P	14	L	Benign
38	CaV	CACNA1F	O60840	P	1491	L	Likely pathogenic
39	CaV	CACNA1F	O60840	P	1572	Q	Uncertain significance
40	CaV	CACNA1F	O60840	P	191	A	Uncertain significance
41	CaV	CACNA1F	O60840	P	348	S	Uncertain significance
42	CaV	CACNA1F	O60840	Q	1625	R	Uncertain significance
43	CaV	CACNA1F	O60840	Q	1762	H	Uncertain significance
44	CaV	CACNA1F	O60840	R	1296	C	Likely pathogenic
45	CaV	CACNA1F	O60840	R	1930	H	Benign
46	CaV	CACNA1F	O60840	R	519	Q	Likely benign
47	CaV	CACNA1F	O60840	R	523	H	Benign
48	CaV	CACNA1F	O60840	R	70	Q	Likely benign
49	CaV	CACNA1F	O60840	R	900	H	Uncertain significance
50	CaV	CACNA1F	O60840	R	937	C	Uncertain significance
51	CaV	CACNA1F	O60840	V	1072	L	Uncertain significance
52	CaV	CACNA1F	O60840	V	635	I	Conflicting interpretations of pathogenicity
53	CaV	CACNA1F	O60840	W	91	L	Uncertain significance
54	CaV	CACNA1F	O60840	Y	1099	C	Uncertain significance
55	CaV	CACNA1G	O43497	A	1238	V	Uncertain significance
56	CaV	CACNA1G	O43497	A	961	T	Conflicting interpretations of pathogenicity
57	CaV	CACNA1G	O43497	D	254	N	Uncertain significance
58	CaV	CACNA1G	O43497	E	2317	K	Likely pathogenic
59	CaV	CACNA1G	O43497	G	581	S	Uncertain significance
60	CaV	CACNA1G	O43497	I	2114	F	Uncertain significance
61	CaV	CACNA1G	O43497	K	1018	T	Uncertain significance
62	CaV	CACNA1G	O43497	L	1891	I	Uncertain significance
63	CaV	CACNA1G	O43497	L	208	P	Likely pathogenic
64	CaV	CACNA1G	O43497	M	1531	V	Pathogenic
65	CaV	CACNA1G	O43497	M	859	R	Uncertain significance
66	CaV	CACNA1G	O43497	M	88	V	Uncertain significance
67	CaV	CACNA1G	O43497	P	2237	H	Uncertain significance
68	CaV	CACNA1G	O43497	P	2356	S	Uncertain significance
69	CaV	CACNA1G	O43497	P	519	L	Uncertain significance
70	CaV	CACNA1G	O43497	P	591	S	Uncertain significance
71	CaV	CACNA1G	O43497	R	102	Q	Uncertain significance
72	CaV	CACNA1G	O43497	R	1185	C	Uncertain significance
73	CaV	CACNA1G	O43497	R	1715	H	Pathogenic
74	CaV	CACNA1G	O43497	R	2301	Q	Uncertain significance
75	CaV	CACNA1G	O43497	R	853	Q	Likely pathogenic
76	CaV	CACNA1G	O43497	S	1105	R	Uncertain significance
77	CaV	CACNA1G	O43497	S	26	W	Uncertain significance
78	CaV	CACNA1G	O43497	S	630	R	Likely pathogenic
79	CaV	CACNA1G	O43497	S	710	C	Uncertain significance
80	CaV	CACNA1G	O43497	T	2113	N	Uncertain significance
81	CaV	CACNA1G	O43497	T	867	P	Likely pathogenic
82	CaV	CACNA1G	O43497	V	954	M	Uncertain significance
83	CaV	CACNA1G	O43497	V	989	I	Uncertain significance
84	CaV	CACNA1G	O43497	Y	1593	C	Uncertain significance
85	CaV	CACNA1G	O43497	Y	1612	H	Uncertain significance
86	CaV	CACNA1H	O95180	A	1020	E	Uncertain significance
87	CaV	CACNA1H	O95180	A	1059	S	Benign
88	CaV	CACNA1H	O95180	A	1208	T	Benign
89	CaV	CACNA1H	O95180	A	1341	V	Uncertain significance
90	CaV	CACNA1H	O95180	A	1349	T	Likely benign
91	CaV	CACNA1H	O95180	A	1358	T	Uncertain significance
92	CaV	CACNA1H	O95180	A	1382	V	Uncertain significance
93	CaV	CACNA1H	O95180	A	1439	V	Uncertain significance
94	CaV	CACNA1H	O95180	A	1476	T	Uncertain significance
95	CaV	CACNA1H	O95180	A	1705	T	Benign
96	CaV	CACNA1H	O95180	A	1870	T	not provided
97	CaV	CACNA1H	O95180	A	1874	V	Uncertain significance
98	CaV	CACNA1H	O95180	A	1940	P	Uncertain significance
99	CaV	CACNA1H	O95180	A	1942	V	Uncertain significance
100	CaV	CACNA1H	O95180	A	1966	V	Benign
101	CaV	CACNA1H	O95180	A	1997	T	Benign
102	CaV	CACNA1H	O95180	A	2085	P	Uncertain significance
103	CaV	CACNA1H	O95180	A	2108	T	Likely benign
104	CaV	CACNA1H	O95180	A	2198	V	Uncertain significance
105	CaV	CACNA1H	O95180	A	2208	V	Uncertain significance
106	CaV	CACNA1H	O95180	A	2209	P	Uncertain significance
107	CaV	CACNA1H	O95180	A	2240	T	Uncertain significance
108	CaV	CACNA1H	O95180	A	332	T	Benign
109	CaV	CACNA1H	O95180	A	555	T	Uncertain significance
110	CaV	CACNA1H	O95180	A	555	V	Benign
111	CaV	CACNA1H	O95180	A	598	V	Likely pathogenic
112	CaV	CACNA1H	O95180	A	599	T	Uncertain significance
113	CaV	CACNA1H	O95180	A	600	V	Uncertain significance
114	CaV	CACNA1H	O95180	A	690	V	Uncertain significance
115	CaV	CACNA1H	O95180	A	76	T	Uncertain significance
116	CaV	CACNA1H	O95180	A	846	V	Uncertain significance
117	CaV	CACNA1H	O95180	A	876	T	Benign
118	CaV	CACNA1H	O95180	A	876	V	Uncertain significance
119	CaV	CACNA1H	O95180	C	128	G	Uncertain significance
120	CaV	CACNA1H	O95180	C	414	Y	Uncertain significance
121	CaV	CACNA1H	O95180	C	847	F	Uncertain significance
122	CaV	CACNA1H	O95180	C	847	S	Uncertain significance
123	CaV	CACNA1H	O95180	D	1023	N	Uncertain significance
124	CaV	CACNA1H	O95180	D	1028	N	Uncertain significance
125	CaV	CACNA1H	O95180	D	1102	N	Uncertain significance
126	CaV	CACNA1H	O95180	D	1200	A	Uncertain significance
127	CaV	CACNA1H	O95180	D	1216	N	Uncertain significance
128	CaV	CACNA1H	O95180	D	1218	N	Uncertain significance
129	CaV	CACNA1H	O95180	D	1233	V	Uncertain significance
130	CaV	CACNA1H	O95180	D	1248	N	Uncertain significance
131	CaV	CACNA1H	O95180	D	1512	N	Uncertain significance
132	CaV	CACNA1H	O95180	D	1520	N	Uncertain significance
133	CaV	CACNA1H	O95180	D	2283	V	Benign
134	CaV	CACNA1H	O95180	D	382	N	Uncertain significance
135	CaV	CACNA1H	O95180	D	568	N	Benign
136	CaV	CACNA1H	O95180	D	579	N	Benign
137	CaV	CACNA1H	O95180	E	10	K	Uncertain significance
138	CaV	CACNA1H	O95180	E	1047	K	Uncertain significance
139	CaV	CACNA1H	O95180	E	1170	K	Uncertain significance
140	CaV	CACNA1H	O95180	E	1197	K	Uncertain significance
141	CaV	CACNA1H	O95180	E	1460	K	Likely benign
142	CaV	CACNA1H	O95180	E	1574	Q	Uncertain significance
143	CaV	CACNA1H	O95180	E	1820	K	Uncertain significance
144	CaV	CACNA1H	O95180	E	1879	K	Uncertain significance
145	CaV	CACNA1H	O95180	E	1974	G	Benign
146	CaV	CACNA1H	O95180	E	2099	K	Uncertain significance
147	CaV	CACNA1H	O95180	E	2334	Q	Uncertain significance
148	CaV	CACNA1H	O95180	E	282	K	risk factor
149	CaV	CACNA1H	O95180	E	285	K	Uncertain significance
150	CaV	CACNA1H	O95180	E	542	K	Uncertain significance
151	CaV	CACNA1H	O95180	E	57	D	Uncertain significance
152	CaV	CACNA1H	O95180	E	718	A	Benign
153	CaV	CACNA1H	O95180	E	718	G	Likely benign
154	CaV	CACNA1H	O95180	E	819	K	Uncertain significance
155	CaV	CACNA1H	O95180	F	161	L	risk factor
156	CaV	CACNA1H	O95180	F	1802	L	Uncertain significance
157	CaV	CACNA1H	O95180	F	1840	C	Uncertain significance
158	CaV	CACNA1H	O95180	F	730	L	Uncertain significance
159	CaV	CACNA1H	O95180	G	1111	R	Benign
160	CaV	CACNA1H	O95180	G	1111	R	Uncertain significance
161	CaV	CACNA1H	O95180	G	1187	R	Uncertain significance
162	CaV	CACNA1H	O95180	G	1219	R	Uncertain significance
163	CaV	CACNA1H	O95180	G	129	S	Benign
164	CaV	CACNA1H	O95180	G	1355	S	Uncertain significance
165	CaV	CACNA1H	O95180	G	1415	D	Uncertain significance
166	CaV	CACNA1H	O95180	G	1992	S	Uncertain significance
167	CaV	CACNA1H	O95180	G	2087	V	Uncertain significance
168	CaV	CACNA1H	O95180	G	2088	R	Uncertain significance
169	CaV	CACNA1H	O95180	G	2128	D	Uncertain significance
170	CaV	CACNA1H	O95180	G	2163	A	Uncertain significance
171	CaV	CACNA1H	O95180	G	2202	D	Uncertain significance
172	CaV	CACNA1H	O95180	G	2241	R	Uncertain significance
173	CaV	CACNA1H	O95180	G	2242	R	Uncertain significance
174	CaV	CACNA1H	O95180	G	2315	S	Likely benign
175	CaV	CACNA1H	O95180	G	245	S	Uncertain significance
176	CaV	CACNA1H	O95180	G	318	S	Uncertain significance
177	CaV	CACNA1H	O95180	G	47	A	Uncertain significance
178	CaV	CACNA1H	O95180	G	501	E	Likely benign
179	CaV	CACNA1H	O95180	G	624	S	Uncertain significance
180	CaV	CACNA1H	O95180	G	631	R	Uncertain significance
181	CaV	CACNA1H	O95180	G	639	R	Uncertain significance
182	CaV	CACNA1H	O95180	G	647	S	Uncertain significance
183	CaV	CACNA1H	O95180	G	691	S	Uncertain significance
184	CaV	CACNA1H	O95180	G	716	C	Uncertain significance
185	CaV	CACNA1H	O95180	G	755	D	Uncertain significance
186	CaV	CACNA1H	O95180	G	773	D	no interpretation for the single variant
187	CaV	CACNA1H	O95180	G	848	S	Uncertain significance
188	CaV	CACNA1H	O95180	G	948	R	Uncertain significance
189	CaV	CACNA1H	O95180	H	1357	L	Uncertain significance
190	CaV	CACNA1H	O95180	H	1477	R	Uncertain significance
191	CaV	CACNA1H	O95180	H	304	Q	Uncertain significance
192	CaV	CACNA1H	O95180	H	391	R	Uncertain significance
193	CaV	CACNA1H	O95180	H	516	Y	Uncertain significance
194	CaV	CACNA1H	O95180	H	646	P	Uncertain significance
195	CaV	CACNA1H	O95180	H	667	Q	Uncertain significance
196	CaV	CACNA1H	O95180	I	1311	V	Uncertain significance
197	CaV	CACNA1H	O95180	I	2300	V	Likely pathogenic
198	CaV	CACNA1H	O95180	I	799	V	Uncertain significance
199	CaV	CACNA1H	O95180	K	1918	E	Uncertain significance
200	CaV	CACNA1H	O95180	K	785	M	Benign
201	CaV	CACNA1H	O95180	L	1058	P	Uncertain significance
202	CaV	CACNA1H	O95180	L	1094	M	Uncertain significance
203	CaV	CACNA1H	O95180	L	1619	F	Uncertain significance
204	CaV	CACNA1H	O95180	L	1995	F	Uncertain significance
205	CaV	CACNA1H	O95180	L	617	P	Uncertain significance
206	CaV	CACNA1H	O95180	L	888	M	Uncertain significance
207	CaV	CACNA1H	O95180	M	1055	V	Likely benign
208	CaV	CACNA1H	O95180	M	1495	K	Uncertain significance
209	CaV	CACNA1H	O95180	M	1549	T	Uncertain significance
210	CaV	CACNA1H	O95180	M	1549	V	Pathogenic
211	CaV	CACNA1H	O95180	M	155	L	Uncertain significance
212	CaV	CACNA1H	O95180	M	1636	V	Uncertain significance
213	CaV	CACNA1H	O95180	M	1694	T	Uncertain significance
214	CaV	CACNA1H	O95180	M	184	I	Uncertain significance
215	CaV	CACNA1H	O95180	M	2312	V	Benign
216	CaV	CACNA1H	O95180	M	313	V	Benign
217	CaV	CACNA1H	O95180	N	1793	S	Benign
218	CaV	CACNA1H	O95180	N	270	T	Likely benign
219	CaV	CACNA1H	O95180	P	1086	S	Uncertain significance
220	CaV	CACNA1H	O95180	P	1088	L	Uncertain significance
221	CaV	CACNA1H	O95180	P	1121	L	Likely benign
222	CaV	CACNA1H	O95180	P	1121	R	Uncertain significance
223	CaV	CACNA1H	O95180	P	1201	T	Uncertain significance
224	CaV	CACNA1H	O95180	P	1210	L	Likely benign
225	CaV	CACNA1H	O95180	P	1529	L	Uncertain significance
226	CaV	CACNA1H	O95180	P	1605	L	Uncertain significance
227	CaV	CACNA1H	O95180	P	1781	R	Uncertain significance
228	CaV	CACNA1H	O95180	P	1899	L	Uncertain significance
229	CaV	CACNA1H	O95180	P	1906	L	Uncertain significance
230	CaV	CACNA1H	O95180	P	1939	L	Uncertain significance
231	CaV	CACNA1H	O95180	P	1947	L	Benign
232	CaV	CACNA1H	O95180	P	1982	L	Uncertain significance
233	CaV	CACNA1H	O95180	P	2110	S	Uncertain significance
234	CaV	CACNA1H	O95180	P	2120	T	Uncertain significance
235	CaV	CACNA1H	O95180	P	2124	L	Likely benign
236	CaV	CACNA1H	O95180	P	2147	L	Uncertain significance
237	CaV	CACNA1H	O95180	P	2173	S	Benign
238	CaV	CACNA1H	O95180	P	2189	S	Uncertain significance
239	CaV	CACNA1H	O95180	P	2206	L	Uncertain significance
240	CaV	CACNA1H	O95180	P	2332	L	Uncertain significance
241	CaV	CACNA1H	O95180	P	277	L	Uncertain significance
242	CaV	CACNA1H	O95180	P	277	S	Uncertain significance
243	CaV	CACNA1H	O95180	P	50	L	Uncertain significance
244	CaV	CACNA1H	O95180	P	585	L	Likely benign
245	CaV	CACNA1H	O95180	P	585	S	Uncertain significance
246	CaV	CACNA1H	O95180	P	618	L	Conflicting interpretations of pathogenicity
247	CaV	CACNA1H	O95180	P	632	H	Uncertain significance
248	CaV	CACNA1H	O95180	P	640	L	Benign
249	CaV	CACNA1H	O95180	P	656	S	Benign
250	CaV	CACNA1H	O95180	P	673	S	Uncertain significance
251	CaV	CACNA1H	O95180	P	684	H	Likely pathogenic
252	CaV	CACNA1H	O95180	P	686	L	Benign
253	CaV	CACNA1H	O95180	P	752	L	Uncertain significance
254	CaV	CACNA1H	O95180	Q	1220	E	Uncertain significance
255	CaV	CACNA1H	O95180	Q	1264	H	Benign
256	CaV	CACNA1H	O95180	Q	163	H	Benign
257	CaV	CACNA1H	O95180	Q	250	H	Uncertain significance
258	CaV	CACNA1H	O95180	Q	765	R	Likely benign
259	CaV	CACNA1H	O95180	R	1069	Q	Benign
260	CaV	CACNA1H	O95180	R	1142	H	Uncertain significance
261	CaV	CACNA1H	O95180	R	1150	H	Uncertain significance
262	CaV	CACNA1H	O95180	R	1157	C	Uncertain significance
263	CaV	CACNA1H	O95180	R	1157	H	Uncertain significance
264	CaV	CACNA1H	O95180	R	1194	Q	Uncertain significance
265	CaV	CACNA1H	O95180	R	1205	Q	Likely benign
266	CaV	CACNA1H	O95180	R	1215	C	Uncertain significance
267	CaV	CACNA1H	O95180	R	1215	H	Uncertain significance
268	CaV	CACNA1H	O95180	R	1217	C	Uncertain significance
269	CaV	CACNA1H	O95180	R	1217	H	Uncertain significance
270	CaV	CACNA1H	O95180	R	1253	C	Uncertain significance
271	CaV	CACNA1H	O95180	R	1267	W	Uncertain significance
272	CaV	CACNA1H	O95180	R	1325	Q	Uncertain significance
273	CaV	CACNA1H	O95180	R	1412	W	Uncertain significance
274	CaV	CACNA1H	O95180	R	1474	W	Benign
275	CaV	CACNA1H	O95180	R	1479	S	Uncertain significance
276	CaV	CACNA1H	O95180	R	1483	H	Uncertain significance
277	CaV	CACNA1H	O95180	R	1580	H	Uncertain significance
278	CaV	CACNA1H	O95180	R	1585	L	Uncertain significance
279	CaV	CACNA1H	O95180	R	1596	H	Uncertain significance
280	CaV	CACNA1H	O95180	R	1597	Q	Benign
281	CaV	CACNA1H	O95180	R	1608	C	Uncertain significance
282	CaV	CACNA1H	O95180	R	1674	C	Uncertain significance
283	CaV	CACNA1H	O95180	R	1675	Q	Uncertain significance
284	CaV	CACNA1H	O95180	R	1721	H	Uncertain significance
285	CaV	CACNA1H	O95180	R	173	S	Uncertain significance
286	CaV	CACNA1H	O95180	R	1736	H	Uncertain significance
287	CaV	CACNA1H	O95180	R	1871	Q	Benign
288	CaV	CACNA1H	O95180	R	1892	L	Benign
289	CaV	CACNA1H	O95180	R	1893	Q	Uncertain significance
290	CaV	CACNA1H	O95180	R	1893	W	Uncertain significance
291	CaV	CACNA1H	O95180	R	1990	S	Uncertain significance
292	CaV	CACNA1H	O95180	R	2005	C	Benign
293	CaV	CACNA1H	O95180	R	2005	H	Uncertain significance
294	CaV	CACNA1H	O95180	R	2011	Q	Uncertain significance
295	CaV	CACNA1H	O95180	R	2011	W	Uncertain significance
296	CaV	CACNA1H	O95180	R	2060	H	Benign
297	CaV	CACNA1H	O95180	R	2070	C	Uncertain significance
298	CaV	CACNA1H	O95180	R	2077	H	Benign
299	CaV	CACNA1H	O95180	R	2082	W	Uncertain significance
300	CaV	CACNA1H	O95180	R	2218	C	Uncertain significance
301	CaV	CACNA1H	O95180	R	2218	H	Benign
302	CaV	CACNA1H	O95180	R	2250	H	Uncertain significance
303	CaV	CACNA1H	O95180	R	2250	S	Uncertain significance
304	CaV	CACNA1H	O95180	R	2257	W	Uncertain significance
305	CaV	CACNA1H	O95180	R	276	Q	Benign
306	CaV	CACNA1H	O95180	R	309	H	Uncertain significance
307	CaV	CACNA1H	O95180	R	334	H	Uncertain significance
308	CaV	CACNA1H	O95180	R	469	C	Uncertain significance
309	CaV	CACNA1H	O95180	R	485	C	Uncertain significance
310	CaV	CACNA1H	O95180	R	503	H	Likely benign
311	CaV	CACNA1H	O95180	R	505	C	Benign
312	CaV	CACNA1H	O95180	R	506	Q	Conflicting interpretations of pathogenicity
313	CaV	CACNA1H	O95180	R	537	H	Uncertain significance
314	CaV	CACNA1H	O95180	R	590	Q	Uncertain significance
315	CaV	CACNA1H	O95180	R	590	W	Uncertain significance
316	CaV	CACNA1H	O95180	R	705	C	Uncertain significance
317	CaV	CACNA1H	O95180	R	725	C	Uncertain significance
318	CaV	CACNA1H	O95180	R	739	C	Uncertain significance
319	CaV	CACNA1H	O95180	R	747	C	Uncertain significance
320	CaV	CACNA1H	O95180	R	762	W	Uncertain significance
321	CaV	CACNA1H	O95180	R	777	C	Uncertain significance
322	CaV	CACNA1H	O95180	R	788	C	Benign
323	CaV	CACNA1H	O95180	R	797	C	Uncertain significance
324	CaV	CACNA1H	O95180	R	854	Q	Uncertain significance
325	CaV	CACNA1H	O95180	R	884	C	Uncertain significance
326	CaV	CACNA1H	O95180	R	902	Q	Uncertain significance
327	CaV	CACNA1H	O95180	R	902	W	Uncertain significance
328	CaV	CACNA1H	O95180	R	903	H	Uncertain significance
329	CaV	CACNA1H	O95180	S	1147	G	Benign
330	CaV	CACNA1H	O95180	S	1174	G	Uncertain significance
331	CaV	CACNA1H	O95180	S	1234	R	Uncertain significance
332	CaV	CACNA1H	O95180	S	1246	L	Uncertain significance
333	CaV	CACNA1H	O95180	S	1246	W	Uncertain significance
334	CaV	CACNA1H	O95180	S	1612	L	Uncertain significance
335	CaV	CACNA1H	O95180	S	1644	L	Uncertain significance
336	CaV	CACNA1H	O95180	S	1890	R	Uncertain significance
337	CaV	CACNA1H	O95180	S	1922	F	Uncertain significance
338	CaV	CACNA1H	O95180	S	1975	F	Likely benign
339	CaV	CACNA1H	O95180	S	1991	R	Uncertain significance
340	CaV	CACNA1H	O95180	S	2008	I	Uncertain significance
341	CaV	CACNA1H	O95180	S	2066	T	Uncertain significance
342	CaV	CACNA1H	O95180	S	2094	W	Uncertain significance
343	CaV	CACNA1H	O95180	S	2157	L	Uncertain significance
344	CaV	CACNA1H	O95180	S	2162	I	Uncertain significance
345	CaV	CACNA1H	O95180	S	2238	L	Uncertain significance
346	CaV	CACNA1H	O95180	S	2295	F	Uncertain significance
347	CaV	CACNA1H	O95180	S	264	G	Uncertain significance
348	CaV	CACNA1H	O95180	S	303	L	Uncertain significance
349	CaV	CACNA1H	O95180	S	677	L	Benign
350	CaV	CACNA1H	O95180	S	680	N	Uncertain significance
351	CaV	CACNA1H	O95180	S	796	N	Uncertain significance
352	CaV	CACNA1H	O95180	T	1034	M	Uncertain significance
353	CaV	CACNA1H	O95180	T	1083	M	Likely pathogenic
354	CaV	CACNA1H	O95180	T	1087	I	Uncertain significance
355	CaV	CACNA1H	O95180	T	1588	A	Uncertain significance
356	CaV	CACNA1H	O95180	T	1606	M	Benign
357	CaV	CACNA1H	O95180	T	2114	I	Uncertain significance
358	CaV	CACNA1H	O95180	T	273	S	Likely benign
359	CaV	CACNA1H	O95180	T	610	A	Likely benign
360	CaV	CACNA1H	O95180	T	615	M	Conflicting interpretations of pathogenicity
361	CaV	CACNA1H	O95180	T	822	I	Uncertain significance
362	CaV	CACNA1H	O95180	T	833	A	Uncertain significance
363	CaV	CACNA1H	O95180	T	920	M	Benign
364	CaV	CACNA1H	O95180	V	105	M	Uncertain significance
365	CaV	CACNA1H	O95180	V	1285	I	Uncertain significance
366	CaV	CACNA1H	O95180	V	1309	I	Uncertain significance
367	CaV	CACNA1H	O95180	V	1374	M	Uncertain significance
368	CaV	CACNA1H	O95180	V	1519	I	Benign
369	CaV	CACNA1H	O95180	V	1542	I	Uncertain significance
370	CaV	CACNA1H	O95180	V	1551	M	Uncertain significance
371	CaV	CACNA1H	O95180	V	1629	A	Uncertain significance
372	CaV	CACNA1H	O95180	V	1838	I	Uncertain significance
373	CaV	CACNA1H	O95180	V	1841	M	Uncertain significance
374	CaV	CACNA1H	O95180	V	1937	M	Uncertain significance
375	CaV	CACNA1H	O95180	V	1951	E	Uncertain significance
376	CaV	CACNA1H	O95180	V	2067	I	Uncertain significance
377	CaV	CACNA1H	O95180	V	2079	I	Uncertain significance
378	CaV	CACNA1H	O95180	V	233	L	Likely pathogenic
379	CaV	CACNA1H	O95180	V	2353	M	Likely benign
380	CaV	CACNA1H	O95180	V	464	M	Uncertain significance
381	CaV	CACNA1H	O95180	V	664	A	Benign
382	CaV	CACNA1H	O95180	V	734	I	Uncertain significance
383	CaV	CACNA1H	O95180	V	780	F	Likely benign
384	CaV	CACNA1H	O95180	V	790	M	Likely benign
385	CaV	CACNA1H	O95180	V	831	M	risk factor
386	CaV	CACNA1H	O95180	W	2154	R	Likely benign
387	CaV	CACNA1H	O95180	W	2171	R	Uncertain significance
388	CaV	CACNA1H	O95180	Y	1618	S	Uncertain significance
389	CaV	CACNA1H	O95180	Y	479	C	Uncertain significance
390	CaV	CACNA1H	O95180	Y	728	C	Uncertain significance
391	CaV	CACNA1I	Q9P0X4	I	1306	T	Uncertain significance
392	CaV	CACNA1S	Q13698	A	1271	T	Benign
393	CaV	CACNA1S	Q13698	A	1282	S	Uncertain significance
394	CaV	CACNA1S	Q13698	A	1324	T	Uncertain significance
395	CaV	CACNA1S	Q13698	A	1666	T	Likely benign
396	CaV	CACNA1S	Q13698	A	200	T	Conflicting interpretations of pathogenicity
397	CaV	CACNA1S	Q13698	A	450	T	Uncertain significance
398	CaV	CACNA1S	Q13698	A	560	S	Likely pathogenic
399	CaV	CACNA1S	Q13698	A	560	T	Uncertain significance
400	CaV	CACNA1S	Q13698	A	63	S	Uncertain significance
401	CaV	CACNA1S	Q13698	A	67	V	Uncertain significance
402	CaV	CACNA1S	Q13698	A	69	G	Benign
403	CaV	CACNA1S	Q13698	A	702	S	Uncertain significance
404	CaV	CACNA1S	Q13698	A	776	D	Uncertain significance
405	CaV	CACNA1S	Q13698	A	814	T	Likely benign
406	CaV	CACNA1S	Q13698	C	501	F	Uncertain significance
407	CaV	CACNA1S	Q13698	C	638	S	Uncertain significance
408	CaV	CACNA1S	Q13698	D	1382	G	Uncertain significance
409	CaV	CACNA1S	Q13698	D	1516	H	Uncertain significance
410	CaV	CACNA1S	Q13698	D	1859	G	Uncertain significance
411	CaV	CACNA1S	Q13698	D	389	V	Uncertain significance
412	CaV	CACNA1S	Q13698	D	836	G	Uncertain significance
413	CaV	CACNA1S	Q13698	D	998	E	Uncertain significance
414	CaV	CACNA1S	Q13698	D	998	N	Conflicting interpretations of pathogenicity
415	CaV	CACNA1S	Q13698	E	1488	K	Likely benign
416	CaV	CACNA1S	Q13698	E	1564	K	Uncertain significance
417	CaV	CACNA1S	Q13698	E	1583	K	Conflicting interpretations of pathogenicity
418	CaV	CACNA1S	Q13698	E	1639	K	Uncertain significance
419	CaV	CACNA1S	Q13698	E	1639	V	Uncertain significance
420	CaV	CACNA1S	Q13698	E	1821	G	Uncertain significance
421	CaV	CACNA1S	Q13698	E	1837	A	Likely benign
422	CaV	CACNA1S	Q13698	E	666	K	Uncertain significance
423	CaV	CACNA1S	Q13698	F	135	S	Uncertain significance
424	CaV	CACNA1S	Q13698	F	1806	S	Uncertain significance
425	CaV	CACNA1S	Q13698	F	434	S	Conflicting interpretations of pathogenicity
426	CaV	CACNA1S	Q13698	G	1062	D	Uncertain significance
427	CaV	CACNA1S	Q13698	G	1136	S	Uncertain significance
428	CaV	CACNA1S	Q13698	G	1210	R	Conflicting interpretations of pathogenicity
429	CaV	CACNA1S	Q13698	G	1252	R	Uncertain significance
430	CaV	CACNA1S	Q13698	G	1297	E	Likely benign
431	CaV	CACNA1S	Q13698	G	1415	R	Uncertain significance
432	CaV	CACNA1S	Q13698	G	1852	R	Likely benign
433	CaV	CACNA1S	Q13698	G	230	S	Uncertain significance
434	CaV	CACNA1S	Q13698	G	258	D	Benign
435	CaV	CACNA1S	Q13698	G	258	S	Uncertain significance
436	CaV	CACNA1S	Q13698	G	258	V	Conflicting interpretations of pathogenicity
437	CaV	CACNA1S	Q13698	G	582	A	Uncertain significance
438	CaV	CACNA1S	Q13698	G	628	S	Uncertain significance
439	CaV	CACNA1S	Q13698	G	629	R	Likely benign
440	CaV	CACNA1S	Q13698	G	85	S	Uncertain significance
441	CaV	CACNA1S	Q13698	G	861	A	Uncertain significance
442	CaV	CACNA1S	Q13698	H	1139	P	Uncertain significance
443	CaV	CACNA1S	Q13698	H	1148	Y	Uncertain significance
444	CaV	CACNA1S	Q13698	H	916	Q	Pathogenic
445	CaV	CACNA1S	Q13698	H	987	R	Likely benign
446	CaV	CACNA1S	Q13698	I	1133	T	Uncertain significance
447	CaV	CACNA1S	Q13698	I	1195	T	Uncertain significance
448	CaV	CACNA1S	Q13698	I	1497	T	Uncertain significance
449	CaV	CACNA1S	Q13698	I	289	V	Uncertain significance
450	CaV	CACNA1S	Q13698	I	605	V	Likely benign
451	CaV	CACNA1S	Q13698	K	1437	Q	Uncertain significance
452	CaV	CACNA1S	Q13698	K	88	E	Uncertain significance
453	CaV	CACNA1S	Q13698	L	132	M	Benign
454	CaV	CACNA1S	Q13698	L	1604	M	Uncertain significance
455	CaV	CACNA1S	Q13698	L	1628	F	Conflicting interpretations of pathogenicity
456	CaV	CACNA1S	Q13698	L	164	F	Uncertain significance
457	CaV	CACNA1S	Q13698	L	1800	S	Benign
458	CaV	CACNA1S	Q13698	L	31	F	Uncertain significance
459	CaV	CACNA1S	Q13698	L	328	M	Uncertain significance
460	CaV	CACNA1S	Q13698	L	398	Q	Uncertain significance
461	CaV	CACNA1S	Q13698	L	458	H	Benign
462	CaV	CACNA1S	Q13698	L	807	F	Uncertain significance
463	CaV	CACNA1S	Q13698	M	1005	L	Uncertain significance
464	CaV	CACNA1S	Q13698	M	1146	K	Uncertain significance
465	CaV	CACNA1S	Q13698	M	1241	T	Uncertain significance
466	CaV	CACNA1S	Q13698	M	152	V	Uncertain significance
467	CaV	CACNA1S	Q13698	M	1593	T	Uncertain significance
468	CaV	CACNA1S	Q13698	M	1750	V	Uncertain significance
469	CaV	CACNA1S	Q13698	M	519	I	Uncertain significance
470	CaV	CACNA1S	Q13698	M	635	K	Uncertain significance
471	CaV	CACNA1S	Q13698	M	635	V	Likely benign
472	CaV	CACNA1S	Q13698	M	701	I	Uncertain significance
473	CaV	CACNA1S	Q13698	M	827	T	Benign
474	CaV	CACNA1S	Q13698	N	1037	K	Uncertain significance
475	CaV	CACNA1S	Q13698	N	1221	I	Uncertain significance
476	CaV	CACNA1S	Q13698	N	1654	K	Uncertain significance
477	CaV	CACNA1S	Q13698	N	1662	Y	Uncertain significance
478	CaV	CACNA1S	Q13698	N	1674	H	Uncertain significance
479	CaV	CACNA1S	Q13698	N	1850	K	Uncertain significance
480	CaV	CACNA1S	Q13698	N	649	H	Uncertain significance
481	CaV	CACNA1S	Q13698	N	803	D	Uncertain significance
482	CaV	CACNA1S	Q13698	P	1268	S	Uncertain significance
483	CaV	CACNA1S	Q13698	P	1767	T	Likely benign
484	CaV	CACNA1S	Q13698	P	1839	S	Benign
485	CaV	CACNA1S	Q13698	P	1871	L	Uncertain significance
486	CaV	CACNA1S	Q13698	P	457	L	Uncertain significance
487	CaV	CACNA1S	Q13698	P	457	S	Uncertain significance
488	CaV	CACNA1S	Q13698	Q	1108	E	Uncertain significance
489	CaV	CACNA1S	Q13698	Q	1142	P	Likely benign
490	CaV	CACNA1S	Q13698	Q	1508	E	Uncertain significance
491	CaV	CACNA1S	Q13698	R	1086	C	Uncertain significance
492	CaV	CACNA1S	Q13698	R	1086	H	risk factor
493	CaV	CACNA1S	Q13698	R	1086	S	not provided
494	CaV	CACNA1S	Q13698	R	1096	H	Conflicting interpretations of pathogenicity
495	CaV	CACNA1S	Q13698	R	119	P	Uncertain significance
496	CaV	CACNA1S	Q13698	R	1229	P	Uncertain significance
497	CaV	CACNA1S	Q13698	R	1239	G	Pathogenic
498	CaV	CACNA1S	Q13698	R	1239	H	Pathogenic
499	CaV	CACNA1S	Q13698	R	1254	G	Uncertain significance
500	CaV	CACNA1S	Q13698	R	1254	Q	Benign
501	CaV	CACNA1S	Q13698	R	1302	W	Uncertain significance
502	CaV	CACNA1S	Q13698	R	1447	Q	Uncertain significance
503	CaV	CACNA1S	Q13698	R	1539	C	Benign
504	CaV	CACNA1S	Q13698	R	1599	W	Uncertain significance
505	CaV	CACNA1S	Q13698	R	1652	C	Benign
506	CaV	CACNA1S	Q13698	R	1658	H	Benign
507	CaV	CACNA1S	Q13698	R	168	Q	Uncertain significance
508	CaV	CACNA1S	Q13698	R	1702	Q	Uncertain significance
509	CaV	CACNA1S	Q13698	R	174	W	Uncertain significance
510	CaV	CACNA1S	Q13698	R	1770	K	Uncertain significance
511	CaV	CACNA1S	Q13698	R	354	W	Uncertain significance
512	CaV	CACNA1S	Q13698	R	364	Q	Uncertain significance
513	CaV	CACNA1S	Q13698	R	419	H	Uncertain significance
514	CaV	CACNA1S	Q13698	R	462	H	Uncertain significance
515	CaV	CACNA1S	Q13698	R	489	C	Uncertain significance
516	CaV	CACNA1S	Q13698	R	498	C	Uncertain significance
517	CaV	CACNA1S	Q13698	R	498	H	Uncertain significance
518	CaV	CACNA1S	Q13698	R	498	L	Conflicting interpretations of pathogenicity
519	CaV	CACNA1S	Q13698	R	528	G	Pathogenic
520	CaV	CACNA1S	Q13698	R	528	H	Pathogenic
521	CaV	CACNA1S	Q13698	R	528	L	Uncertain significance
522	CaV	CACNA1S	Q13698	R	557	H	Benign
523	CaV	CACNA1S	Q13698	R	593	W	Uncertain significance
524	CaV	CACNA1S	Q13698	R	594	C	Benign
525	CaV	CACNA1S	Q13698	R	594	H	Uncertain significance
526	CaV	CACNA1S	Q13698	R	683	C	Benign
527	CaV	CACNA1S	Q13698	R	683	H	Uncertain significance
528	CaV	CACNA1S	Q13698	R	789	C	Uncertain significance
529	CaV	CACNA1S	Q13698	R	794	H	Uncertain significance
530	CaV	CACNA1S	Q13698	R	823	W	Uncertain significance
531	CaV	CACNA1S	Q13698	R	865	H	Likely benign
532	CaV	CACNA1S	Q13698	R	897	K	Uncertain significance
533	CaV	CACNA1S	Q13698	R	897	S	Uncertain significance
534	CaV	CACNA1S	Q13698	R	910	K	Uncertain significance
535	CaV	CACNA1S	Q13698	R	986	H	Likely benign
536	CaV	CACNA1S	Q13698	S	1333	N	Uncertain significance
537	CaV	CACNA1S	Q13698	S	154	G	Likely benign
538	CaV	CACNA1S	Q13698	S	1756	N	Uncertain significance
539	CaV	CACNA1S	Q13698	S	177	L	Conflicting interpretations of pathogenicity
540	CaV	CACNA1S	Q13698	S	1857	N	Likely benign
541	CaV	CACNA1S	Q13698	S	451	L	Uncertain significance
542	CaV	CACNA1S	Q13698	S	516	L	Benign
543	CaV	CACNA1S	Q13698	S	606	N	Benign
544	CaV	CACNA1S	Q13698	S	618	A	Uncertain significance
545	CaV	CACNA1S	Q13698	S	826	T	Uncertain significance
546	CaV	CACNA1S	Q13698	S	993	R	Uncertain significance
547	CaV	CACNA1S	Q13698	T	1009	M	Uncertain significance
548	CaV	CACNA1S	Q13698	T	128	S	Benign
549	CaV	CACNA1S	Q13698	T	1351	A	Uncertain significance
550	CaV	CACNA1S	Q13698	T	1354	I	Uncertain significance
551	CaV	CACNA1S	Q13698	T	1354	S	Conflicting interpretations of pathogenicity
552	CaV	CACNA1S	Q13698	T	1573	M	Likely benign
553	CaV	CACNA1S	Q13698	T	1696	M	Benign
554	CaV	CACNA1S	Q13698	T	1772	S	Uncertain significance
555	CaV	CACNA1S	Q13698	T	1830	R	Uncertain significance
556	CaV	CACNA1S	Q13698	T	236	K	Uncertain significance
557	CaV	CACNA1S	Q13698	T	248	M	Conflicting interpretations of pathogenicity
558	CaV	CACNA1S	Q13698	T	316	S	Uncertain significance
559	CaV	CACNA1S	Q13698	T	461	N	Uncertain significance
560	CaV	CACNA1S	Q13698	T	520	P	Uncertain significance
561	CaV	CACNA1S	Q13698	T	543	M	Uncertain significance
562	CaV	CACNA1S	Q13698	T	700	M	Uncertain significance
563	CaV	CACNA1S	Q13698	V	1031	M	Uncertain significance
564	CaV	CACNA1S	Q13698	V	1064	I	Uncertain significance
565	CaV	CACNA1S	Q13698	V	1111	M	Likely benign
566	CaV	CACNA1S	Q13698	V	1222	I	Likely benign
567	CaV	CACNA1S	Q13698	V	1449	G	Conflicting interpretations of pathogenicity
568	CaV	CACNA1S	Q13698	V	161	A	Uncertain significance
569	CaV	CACNA1S	Q13698	V	161	I	Uncertain significance
570	CaV	CACNA1S	Q13698	V	1621	A	Uncertain significance
571	CaV	CACNA1S	Q13698	V	1621	I	Uncertain significance
572	CaV	CACNA1S	Q13698	V	176	L	Uncertain significance
573	CaV	CACNA1S	Q13698	V	207	I	Uncertain significance
574	CaV	CACNA1S	Q13698	V	297	I	Uncertain significance
575	CaV	CACNA1S	Q13698	V	470	L	Uncertain significance
576	CaV	CACNA1S	Q13698	V	571	I	Benign
577	CaV	CACNA1S	Q13698	V	66	M	Uncertain significance
578	CaV	CACNA1S	Q13698	V	661	M	Uncertain significance
579	CaV	CACNA1S	Q13698	V	70	M	Uncertain significance
580	CaV	CACNA1S	Q13698	V	876	E	Pathogenic
581	CaV	CACNA1S	Q13698	V	898	M	Uncertain significance
582	CaV	CACNA1S	Q13698	V	918	A	Uncertain significance
583	CaV	CACNA1S	Q13698	V	923	L	Uncertain significance
584	CaV	CACNA1S	Q13698	V	923	M	Uncertain significance
585	CaV	CACNA1S	Q13698	V	974	E	Uncertain significance
586	CaV	CACNA1S	Q13698	V	974	M	Uncertain significance
587	CaV	CACNA1S	Q13698	W	300	R	Uncertain significance
588	CaV	CACNA1S	Q13698	Y	1113	H	Uncertain significance
589	CaV	CACNA1S	Q13698	Y	1140	C	Uncertain significance
590	CaV	CACNA1S	Q13698	Y	1177	F	Uncertain significance
591	CaV	CACNA1S	Q13698	Y	1670	N	Uncertain significance
592	CaV	CACNA1S	Q13698	Y	299	H	Benign
593	CaV	CACNA1S	Q13698	Y	854	S	Uncertain significance
594	KV	KCNA1	Q09470	A	166	P	Uncertain significance
595	KV	KCNA1	Q09470	A	242	P	Pathogenic
596	KV	KCNA1	Q09470	A	352	P	Uncertain significance
597	KV	KCNA1	Q09470	A	395	S	Likely pathogenic
598	KV	KCNA1	Q09470	A	401	V	Pathogenic
599	KV	KCNA1	Q09470	E	124	K	Uncertain significance
600	KV	KCNA1	Q09470	E	187	K	Uncertain significance
601	KV	KCNA1	Q09470	E	325	D	Pathogenic
602	KV	KCNA1	Q09470	F	184	C	Pathogenic
603	KV	KCNA1	Q09470	F	249	I	Pathogenic
604	KV	KCNA1	Q09470	F	414	C	Pathogenic
605	KV	KCNA1	Q09470	G	200	A	Uncertain significance
606	KV	KCNA1	Q09470	G	376	R	Uncertain significance
607	KV	KCNA1	Q09470	H	18	P	Uncertain significance
608	KV	KCNA1	Q09470	I	177	N	Pathogenic
609	KV	KCNA1	Q09470	I	314	T	Likely pathogenic
610	KV	KCNA1	Q09470	K	138	Q	Uncertain significance
611	KV	KCNA1	Q09470	L	291	H	Uncertain significance
612	KV	KCNA1	Q09470	L	305	F	Likely pathogenic
613	KV	KCNA1	Q09470	M	4	I	Uncertain significance
614	KV	KCNA1	Q09470	M	449	T	Uncertain significance
615	KV	KCNA1	Q09470	M	455	K	Uncertain significance
616	KV	KCNA1	Q09470	N	255	D	Pathogenic
617	KV	KCNA1	Q09470	P	244	H	Pathogenic
618	KV	KCNA1	Q09470	P	405	L	Pathogenic
619	KV	KCNA1	Q09470	P	75	H	Uncertain significance
620	KV	KCNA1	Q09470	Q	20	H	Uncertain significance
621	KV	KCNA1	Q09470	Q	483	H	Uncertain significance
622	KV	KCNA1	Q09470	R	204	H	Uncertain significance
623	KV	KCNA1	Q09470	R	239	S	Pathogenic
624	KV	KCNA1	Q09470	R	26	W	Uncertain significance
625	KV	KCNA1	Q09470	R	295	H	Uncertain significance
626	KV	KCNA1	Q09470	R	443	G	Conflicting interpretations of pathogenicity
627	KV	KCNA1	Q09470	S	322	R	Uncertain significance
628	KV	KCNA1	Q09470	S	489	N	Uncertain significance
629	KV	KCNA1	Q09470	T	226	A	Pathogenic
630	KV	KCNA1	Q09470	T	226	K	Pathogenic
631	KV	KCNA1	Q09470	T	226	M	Pathogenic
632	KV	KCNA1	Q09470	T	226	R	Pathogenic
633	KV	KCNA1	Q09470	V	106	A	Uncertain significance
634	KV	KCNA1	Q09470	V	174	F	Pathogenic
635	KV	KCNA1	Q09470	V	404	I	Pathogenic
636	KV	KCNA1	Q09470	V	408	A	Pathogenic
637	KV	KCNA1	Q09470	V	408	L	Pathogenic
638	KV	KCNA1	Q09470	V	408	M	Uncertain significance
639	KV	KCNA1	Q09470	Y	159	H	Uncertain significance
640	KV	KCNA2	P16389	A	281	T	Uncertain significance
641	KV	KCNA2	P16389	C	435	S	Uncertain significance
642	KV	KCNA2	P16389	E	183	K	Uncertain significance
643	KV	KCNA2	P16389	F	333	L	Uncertain significance
644	KV	KCNA2	P16389	G	211	R	Uncertain significance
645	KV	KCNA2	P16389	G	284	D	Uncertain significance
646	KV	KCNA2	P16389	G	338	E	Likely pathogenic
647	KV	KCNA2	P16389	G	376	A	Uncertain significance
648	KV	KCNA2	P16389	I	263	T	Pathogenic
649	KV	KCNA2	P16389	I	385	T	Uncertain significance
650	KV	KCNA2	P16389	L	290	P	Likely pathogenic
651	KV	KCNA2	P16389	L	298	F	Pathogenic
652	KV	KCNA2	P16389	L	321	F	Uncertain significance
653	KV	KCNA2	P16389	L	330	R	Likely pathogenic
654	KV	KCNA2	P16389	P	362	A	Likely pathogenic
655	KV	KCNA2	P16389	P	382	L	Uncertain significance
656	KV	KCNA2	P16389	P	405	L	Pathogenic
657	KV	KCNA2	P16389	R	189	W	Uncertain significance
658	KV	KCNA2	P16389	R	294	H	Conflicting interpretations of pathogenicity
659	KV	KCNA2	P16389	R	297	Q	Pathogenic
660	KV	KCNA2	P16389	R	419	Q	Uncertain significance
661	KV	KCNA2	P16389	R	73	Q	Uncertain significance
662	KV	KCNA2	P16389	R	80	W	Uncertain significance
663	KV	KCNA2	P16389	R	82	C	Uncertain significance
664	KV	KCNA2	P16389	S	343	F	Uncertain significance
665	KV	KCNA2	P16389	T	320	I	Likely pathogenic
666	KV	KCNA2	P16389	T	373	I	Likely pathogenic
667	KV	KCNA2	P16389	T	374	A	Pathogenic
668	KV	KCNA2	P16389	T	401	I	Likely pathogenic
669	KV	KCNA2	P16389	V	299	L	Uncertain significance
670	KV	KCNA2	P16389	V	399	M	Likely pathogenic
671	KV	KCNA2	P16389	V	406	F	Uncertain significance
672	KV	KCNA2	P16389	W	232	R	Uncertain significance
673	KV	KCNA2	P16389	Y	23	C	Likely pathogenic
674	KV	KCNA3	P22001	K	134	R	Uncertain significance
675	KV	KCNA5	P22460	A	251	T	Benign
676	KV	KCNA5	P22460	A	293	T	Uncertain significance
677	KV	KCNA5	P22460	A	305	T	Uncertain significance
678	KV	KCNA5	P22460	A	321	T	Likely benign
679	KV	KCNA5	P22460	A	576	V	Pathogenic
680	KV	KCNA5	P22460	C	36	S	Uncertain significance
681	KV	KCNA5	P22460	D	166	A	Uncertain significance
682	KV	KCNA5	P22460	D	322	E	Uncertain significance
683	KV	KCNA5	P22460	D	322	H	Uncertain significance
684	KV	KCNA5	P22460	E	211	D	Conflicting interpretations of pathogenicity
685	KV	KCNA5	P22460	E	223	K	Uncertain significance
686	KV	KCNA5	P22460	E	33	V	Uncertain significance
687	KV	KCNA5	P22460	E	48	G	Pathogenic
688	KV	KCNA5	P22460	E	610	K	Pathogenic
689	KV	KCNA5	P22460	E	84	A	Uncertain significance
690	KV	KCNA5	P22460	F	522	S	Uncertain significance
691	KV	KCNA5	P22460	G	128	R	Uncertain significance
692	KV	KCNA5	P22460	G	182	R	Uncertain significance
693	KV	KCNA5	P22460	G	27	S	Uncertain significance
694	KV	KCNA5	P22460	G	300	C	Uncertain significance
695	KV	KCNA5	P22460	G	300	S	Conflicting interpretations of pathogenicity
696	KV	KCNA5	P22460	G	31	V	Benign
697	KV	KCNA5	P22460	G	384	R	Conflicting interpretations of pathogenicity
698	KV	KCNA5	P22460	G	558	R	Likely benign
699	KV	KCNA5	P22460	G	561	R	Uncertain significance
700	KV	KCNA5	P22460	G	568	V	Uncertain significance
701	KV	KCNA5	P22460	G	74	E	Likely benign
702	KV	KCNA5	P22460	I	252	V	Uncertain significance
703	KV	KCNA5	P22460	I	443	V	Uncertain significance
704	KV	KCNA5	P22460	I	467	T	Uncertain significance
705	KV	KCNA5	P22460	K	349	E	Uncertain significance
706	KV	KCNA5	P22460	K	47	R	Uncertain significance
707	KV	KCNA5	P22460	M	304	T	Uncertain significance
708	KV	KCNA5	P22460	P	307	S	Conflicting interpretations of pathogenicity
709	KV	KCNA5	P22460	P	310	L	Benign
710	KV	KCNA5	P22460	P	323	S	Uncertain significance
711	KV	KCNA5	P22460	P	347	S	Uncertain significance
712	KV	KCNA5	P22460	P	532	L	Likely benign
713	KV	KCNA5	P22460	P	77	S	Benign
714	KV	KCNA5	P22460	R	154	S	Uncertain significance
715	KV	KCNA5	P22460	R	184	H	Uncertain significance
716	KV	KCNA5	P22460	R	212	C	Conflicting interpretations of pathogenicity
717	KV	KCNA5	P22460	R	234	L	Uncertain significance
718	KV	KCNA5	P22460	R	283	C	Uncertain significance
719	KV	KCNA5	P22460	R	283	H	Uncertain significance
720	KV	KCNA5	P22460	R	577	Q	Uncertain significance
721	KV	KCNA5	P22460	R	578	K	Benign
722	KV	KCNA5	P22460	R	597	Q	Uncertain significance
723	KV	KCNA5	P22460	R	609	P	Uncertain significance
724	KV	KCNA5	P22460	R	87	Q	Uncertain significance
725	KV	KCNA5	P22460	T	266	I	Uncertain significance
726	KV	KCNA5	P22460	T	527	M	Uncertain significance
727	KV	KCNA5	P22460	T	611	K	Uncertain significance
728	KV	KCNA5	P22460	V	259	F	Uncertain significance
729	KV	KCNA5	P22460	V	452	I	Uncertain significance
730	KV	KCNA5	P22460	V	452	L	Uncertain significance
731	KV	KCNA5	P22460	Y	155	C	Conflicting interpretations of pathogenicity
732	KV	KCNB1	Q14721	A	702	E	Uncertain significance
733	KV	KCNB1	Q14721	A	706	T	Uncertain significance
734	KV	KCNB1	Q14721	A	758	T	Uncertain significance
735	KV	KCNB1	Q14721	C	397	Y	Likely pathogenic
736	KV	KCNB1	Q14721	D	382	H	Pathogenic
737	KV	KCNB1	Q14721	D	771	V	Uncertain significance
738	KV	KCNB1	Q14721	E	157	D	Uncertain significance
739	KV	KCNB1	Q14721	E	330	D	Likely pathogenic
740	KV	KCNB1	Q14721	E	330	K	Likely pathogenic
741	KV	KCNB1	Q14721	E	353	K	Likely pathogenic
742	KV	KCNB1	Q14721	E	422	A	Likely pathogenic
743	KV	KCNB1	Q14721	E	798	Q	Uncertain significance
744	KV	KCNB1	Q14721	G	332	V	Likely pathogenic
745	KV	KCNB1	Q14721	G	379	R	Pathogenic
746	KV	KCNB1	Q14721	G	38	A	Uncertain significance
747	KV	KCNB1	Q14721	G	381	E	Pathogenic
748	KV	KCNB1	Q14721	G	395	R	Likely pathogenic
749	KV	KCNB1	Q14721	H	313	R	Likely pathogenic
750	KV	KCNB1	Q14721	H	313	Y	Likely pathogenic
751	KV	KCNB1	Q14721	H	42	Q	Uncertain significance
752	KV	KCNB1	Q14721	I	193	K	Uncertain significance
753	KV	KCNB1	Q14721	I	463	T	Uncertain significance
754	KV	KCNB1	Q14721	I	565	V	Likely benign
755	KV	KCNB1	Q14721	I	814	M	Likely benign
756	KV	KCNB1	Q14721	K	7	E	Uncertain significance
757	KV	KCNB1	Q14721	K	776	R	Uncertain significance
758	KV	KCNB1	Q14721	L	271	P	Uncertain significance
759	KV	KCNB1	Q14721	L	334	P	Likely pathogenic
760	KV	KCNB1	Q14721	N	697	K	Uncertain significance
761	KV	KCNB1	Q14721	P	385	T	Likely pathogenic
762	KV	KCNB1	Q14721	P	613	S	Benign
763	KV	KCNB1	Q14721	P	666	L	Conflicting interpretations of pathogenicity
764	KV	KCNB1	Q14721	P	734	S	Uncertain significance
765	KV	KCNB1	Q14721	P	735	A	Uncertain significance
766	KV	KCNB1	Q14721	P	774	T	Uncertain significance
767	KV	KCNB1	Q14721	P	775	H	Uncertain significance
768	KV	KCNB1	Q14721	P	775	R	Conflicting interpretations of pathogenicity
769	KV	KCNB1	Q14721	P	784	L	Uncertain significance
770	KV	KCNB1	Q14721	P	825	S	Benign
771	KV	KCNB1	Q14721	P	839	L	Likely benign
772	KV	KCNB1	Q14721	R	303	Q	Conflicting interpretations of pathogenicity
773	KV	KCNB1	Q14721	R	306	C	Pathogenic
774	KV	KCNB1	Q14721	R	312	C	Pathogenic
775	KV	KCNB1	Q14721	R	312	H	Likely pathogenic
776	KV	KCNB1	Q14721	R	456	Q	Conflicting interpretations of pathogenicity
777	KV	KCNB1	Q14721	R	575	C	Uncertain significance
778	KV	KCNB1	Q14721	R	627	Q	Uncertain significance
779	KV	KCNB1	Q14721	R	670	Q	Uncertain significance
780	KV	KCNB1	Q14721	S	202	F	Uncertain significance
781	KV	KCNB1	Q14721	S	347	R	Pathogenic
782	KV	KCNB1	Q14721	S	633	N	Uncertain significance
783	KV	KCNB1	Q14721	S	857	N	Benign
784	KV	KCNB1	Q14721	T	210	M	Pathogenic
785	KV	KCNB1	Q14721	T	374	I	Pathogenic
786	KV	KCNB1	Q14721	T	576	K	Uncertain significance
787	KV	KCNB1	Q14721	T	616	S	Benign
788	KV	KCNB1	Q14721	T	788	K	Benign
789	KV	KCNB1	Q14721	T	804	I	Uncertain significance
790	KV	KCNB1	Q14721	V	200	I	Uncertain significance
791	KV	KCNB1	Q14721	V	446	I	Uncertain significance
792	KV	KCNB1	Q14721	V	465	I	Uncertain significance
793	KV	KCNB1	Q14721	V	526	I	Conflicting interpretations of pathogenicity
794	KV	KCNB1	Q14721	V	718	M	Uncertain significance
795	KV	KCNB1	Q14721	W	370	R	Pathogenic
796	KV	KCNC1	P48547	V	476	I	Uncertain significance
797	KV	KCNC3	Q14003	A	16	T	Likely benign
798	KV	KCNC3	Q14003	D	477	N	Uncertain significance
799	KV	KCNC3	Q14003	D	63	G	Benign
800	KV	KCNC3	Q14003	E	652	K	Uncertain significance
801	KV	KCNC3	Q14003	F	448	L	Pathogenic
802	KV	KCNC3	Q14003	G	331	R	Uncertain significance
803	KV	KCNC3	Q14003	I	337	T	Uncertain significance
804	KV	KCNC3	Q14003	I	693	M	Likely pathogenic
805	KV	KCNC3	Q14003	M	509	V	Uncertain significance
806	KV	KCNC3	Q14003	M	550	V	Uncertain significance
807	KV	KCNC3	Q14003	P	257	T	Uncertain significance
808	KV	KCNC3	Q14003	P	43	S	Benign
809	KV	KCNC3	Q14003	P	587	L	Benign
810	KV	KCNC3	Q14003	P	647	L	Uncertain significance
811	KV	KCNC3	Q14003	Q	41	H	Benign
812	KV	KCNC3	Q14003	R	420	H	Pathogenic
813	KV	KCNC3	Q14003	R	423	H	Pathogenic
814	KV	KCNC3	Q14003	R	565	W	Uncertain significance
815	KV	KCNC3	Q14003	R	698	H	Benign
816	KV	KCNC3	Q14003	S	399	L	Uncertain significance
817	KV	KCNC3	Q14003	S	8	W	Conflicting interpretations of pathogenicity
818	KV	KCNC3	Q14003	T	428	I	Pathogenic
819	KV	KCND2	Q9NZV8	A	249	V	Likely benign
820	KV	KCND2	Q9NZV8	A	441	T	Uncertain significance
821	KV	KCND2	Q9NZV8	A	543	V	Uncertain significance
822	KV	KCND2	Q9NZV8	F	11	L	Uncertain significance
823	KV	KCND2	Q9NZV8	N	442	S	Uncertain significance
824	KV	KCND2	Q9NZV8	P	512	S	Uncertain significance
825	KV	KCND2	Q9NZV8	R	533	Q	Uncertain significance
826	KV	KCND2	Q9NZV8	R	539	H	Uncertain significance
827	KV	KCND2	Q9NZV8	R	562	S	Uncertain significance
828	KV	KCND2	Q9NZV8	V	404	M	Uncertain significance
829	KV	KCND2	Q9NZV8	Y	413	C	Uncertain significance
830	KV	KCND3	Q9UK17	A	15	V	Uncertain significance
831	KV	KCND3	Q9UK17	A	172	T	Uncertain significance
832	KV	KCND3	Q9UK17	A	2	E	Conflicting interpretations of pathogenicity
833	KV	KCND3	Q9UK17	A	30	D	Uncertain significance
834	KV	KCND3	Q9UK17	D	149	G	Uncertain significance
835	KV	KCND3	Q9UK17	E	145	K	Uncertain significance
836	KV	KCND3	Q9UK17	E	343	K	Uncertain significance
837	KV	KCND3	Q9UK17	E	452	K	Conflicting interpretations of pathogenicity
838	KV	KCND3	Q9UK17	F	185	L	Uncertain significance
839	KV	KCND3	Q9UK17	F	351	L	Likely pathogenic
840	KV	KCND3	Q9UK17	G	273	S	Uncertain significance
841	KV	KCND3	Q9UK17	G	345	V	Pathogenic
842	KV	KCND3	Q9UK17	G	371	R	Likely pathogenic
843	KV	KCND3	Q9UK17	G	600	R	Uncertain significance
844	KV	KCND3	Q9UK17	I	617	V	Uncertain significance
845	KV	KCND3	Q9UK17	I	642	F	Uncertain significance
846	KV	KCND3	Q9UK17	I	645	T	Uncertain significance
847	KV	KCND3	Q9UK17	K	214	R	Conflicting interpretations of pathogenicity
848	KV	KCND3	Q9UK17	L	450	F	Conflicting interpretations of pathogenicity
849	KV	KCND3	Q9UK17	L	471	F	Uncertain significance
850	KV	KCND3	Q9UK17	L	586	V	Uncertain significance
851	KV	KCND3	Q9UK17	M	373	I	Uncertain significance
852	KV	KCND3	Q9UK17	M	515	L	Uncertain significance
853	KV	KCND3	Q9UK17	M	525	V	Likely benign
854	KV	KCND3	Q9UK17	M	570	T	Uncertain significance
855	KV	KCND3	Q9UK17	N	639	K	Uncertain significance
856	KV	KCND3	Q9UK17	P	31	S	Uncertain significance
857	KV	KCND3	Q9UK17	P	534	L	Uncertain significance
858	KV	KCND3	Q9UK17	R	13	Q	Uncertain significance
859	KV	KCND3	Q9UK17	R	419	H	Uncertain significance
860	KV	KCND3	Q9UK17	R	431	H	Uncertain significance
861	KV	KCND3	Q9UK17	R	446	C	Uncertain significance
862	KV	KCND3	Q9UK17	R	549	C	Uncertain significance
863	KV	KCND3	Q9UK17	R	549	H	Uncertain significance
864	KV	KCND3	Q9UK17	R	568	H	Uncertain significance
865	KV	KCND3	Q9UK17	R	590	H	Likely benign
866	KV	KCND3	Q9UK17	S	223	P	Uncertain significance
867	KV	KCND3	Q9UK17	S	385	P	Pathogenic
868	KV	KCND3	Q9UK17	S	390	N	Uncertain significance
869	KV	KCND3	Q9UK17	S	438	W	Uncertain significance
870	KV	KCND3	Q9UK17	S	499	C	Uncertain significance
871	KV	KCND3	Q9UK17	S	581	C	Uncertain significance
872	KV	KCND3	Q9UK17	T	209	M	Uncertain significance
873	KV	KCND3	Q9UK17	T	313	A	Uncertain significance
874	KV	KCND3	Q9UK17	T	352	A	Uncertain significance
875	KV	KCND3	Q9UK17	T	352	P	Pathogenic
876	KV	KCND3	Q9UK17	T	457	M	Uncertain significance
877	KV	KCND3	Q9UK17	T	486	A	Conflicting interpretations of pathogenicity
878	KV	KCND3	Q9UK17	V	392	I	Conflicting interpretations of pathogenicity
879	KV	KCND3	Q9UK17	V	399	L	Likely pathogenic
880	KV	KCND3	Q9UK17	Y	133	H	Uncertain significance
881	KV	KCNF1	Q9H3M0	P	83	L	Uncertain significance
882	KV	KCNH1	O95259	F	502	S	Uncertain significance
883	KV	KCNH1	O95259	I	494	V	Pathogenic
884	KV	KCNH1	O95259	K	199	R	Likely pathogenic
885	KV	KCNH1	O95259	K	217	N	Pathogenic
886	KV	KCNH1	O95259	K	354	N	Likely pathogenic
887	KV	KCNH1	O95259	L	379	P	Likely pathogenic
888	KV	KCNH1	O95259	L	489	F	Pathogenic
889	KV	KCNH1	O95259	L	516	F	Pathogenic
890	KV	KCNH1	O95259	Q	503	R	Pathogenic
891	KV	KCNH1	O95259	R	357	Q	Pathogenic
892	KV	KCNH1	O95259	V	569	M	Likely pathogenic
893	KV	KCNH2	Q12809	A	1017	S	Uncertain significance
894	KV	KCNH2	Q12809	A	1058	E	not provided
895	KV	KCNH2	Q12809	A	1058	T	Uncertain significance
896	KV	KCNH2	Q12809	A	1077	T	Uncertain significance
897	KV	KCNH2	Q12809	A	1116	V	not provided
898	KV	KCNH2	Q12809	A	1144	T	not provided
899	KV	KCNH2	Q12809	A	172	V	Uncertain significance
900	KV	KCNH2	Q12809	A	175	D	Conflicting interpretations of pathogenicity
901	KV	KCNH2	Q12809	A	175	T	Uncertain significance
902	KV	KCNH2	Q12809	A	188	V	Uncertain significance
903	KV	KCNH2	Q12809	A	190	T	Uncertain significance
904	KV	KCNH2	Q12809	A	203	T	Uncertain significance
905	KV	KCNH2	Q12809	A	228	P	Uncertain significance
906	KV	KCNH2	Q12809	A	233	S	Likely benign
907	KV	KCNH2	Q12809	A	244	V	Uncertain significance
908	KV	KCNH2	Q12809	A	253	G	Uncertain significance
909	KV	KCNH2	Q12809	A	260	P	Uncertain significance
910	KV	KCNH2	Q12809	A	260	V	Uncertain significance
911	KV	KCNH2	Q12809	A	277	D	not provided
912	KV	KCNH2	Q12809	A	285	S	Uncertain significance
913	KV	KCNH2	Q12809	A	285	T	Uncertain significance
914	KV	KCNH2	Q12809	A	290	P	Uncertain significance
915	KV	KCNH2	Q12809	A	290	S	Uncertain significance
916	KV	KCNH2	Q12809	A	293	S	Uncertain significance
917	KV	KCNH2	Q12809	A	32	T	not provided
918	KV	KCNH2	Q12809	A	40	V	Likely pathogenic
919	KV	KCNH2	Q12809	A	422	T	Pathogenic
920	KV	KCNH2	Q12809	A	429	P	not provided
921	KV	KCNH2	Q12809	A	442	V	Uncertain significance
922	KV	KCNH2	Q12809	A	448	S	Conflicting interpretations of pathogenicity
923	KV	KCNH2	Q12809	A	490	P	not provided
924	KV	KCNH2	Q12809	A	490	T	Pathogenic
925	KV	KCNH2	Q12809	A	558	E	not provided
926	KV	KCNH2	Q12809	A	558	P	Pathogenic
927	KV	KCNH2	Q12809	A	561	P	Pathogenic
928	KV	KCNH2	Q12809	A	561	T	Pathogenic
929	KV	KCNH2	Q12809	A	561	V	Pathogenic
930	KV	KCNH2	Q12809	A	565	P	Likely pathogenic
931	KV	KCNH2	Q12809	A	565	S	Uncertain significance
932	KV	KCNH2	Q12809	A	565	T	not provided
933	KV	KCNH2	Q12809	A	565	V	Pathogenic
934	KV	KCNH2	Q12809	A	57	P	not provided
935	KV	KCNH2	Q12809	A	57	V	Likely pathogenic
936	KV	KCNH2	Q12809	A	614	V	Pathogenic
937	KV	KCNH2	Q12809	A	715	V	Uncertain significance
938	KV	KCNH2	Q12809	A	746	S	Uncertain significance
939	KV	KCNH2	Q12809	A	753	S	not provided
940	KV	KCNH2	Q12809	A	755	T	Likely pathogenic
941	KV	KCNH2	Q12809	A	78	P	not provided
942	KV	KCNH2	Q12809	A	79	P	Likely pathogenic
943	KV	KCNH2	Q12809	A	79	S	Uncertain significance
944	KV	KCNH2	Q12809	A	797	D	Likely pathogenic
945	KV	KCNH2	Q12809	A	80	P	not provided
946	KV	KCNH2	Q12809	A	80	V	not provided
947	KV	KCNH2	Q12809	A	85	P	not provided
948	KV	KCNH2	Q12809	A	85	T	Uncertain significance
949	KV	KCNH2	Q12809	A	85	V	not provided
950	KV	KCNH2	Q12809	A	9	V	Uncertain significance
951	KV	KCNH2	Q12809	A	907	T	Uncertain significance
952	KV	KCNH2	Q12809	A	913	V	Conflicting interpretations of pathogenicity
953	KV	KCNH2	Q12809	A	915	V	not provided
954	KV	KCNH2	Q12809	A	97	G	Uncertain significance
955	KV	KCNH2	Q12809	C	108	R	not provided
956	KV	KCNH2	Q12809	C	1117	F	Uncertain significance
957	KV	KCNH2	Q12809	C	1117	Y	Uncertain significance
958	KV	KCNH2	Q12809	C	39	R	Uncertain significance
959	KV	KCNH2	Q12809	C	44	F	not provided
960	KV	KCNH2	Q12809	C	44	W	not provided
961	KV	KCNH2	Q12809	C	49	W	Pathogenic
962	KV	KCNH2	Q12809	C	49	Y	not provided
963	KV	KCNH2	Q12809	C	555	Y	Likely pathogenic
964	KV	KCNH2	Q12809	C	566	F	not provided
965	KV	KCNH2	Q12809	C	566	G	not provided
966	KV	KCNH2	Q12809	C	566	S	not provided
967	KV	KCNH2	Q12809	C	64	W	not provided
968	KV	KCNH2	Q12809	C	64	Y	not provided
969	KV	KCNH2	Q12809	C	66	G	not provided
970	KV	KCNH2	Q12809	C	66	R	Uncertain significance
971	KV	KCNH2	Q12809	C	66	Y	Likely pathogenic
972	KV	KCNH2	Q12809	C	723	R	not provided
973	KV	KCNH2	Q12809	C	723	Y	Uncertain significance
974	KV	KCNH2	Q12809	C	977	F	Uncertain significance
975	KV	KCNH2	Q12809	D	1003	N	Uncertain significance
976	KV	KCNH2	Q12809	D	1003	Y	Likely pathogenic
977	KV	KCNH2	Q12809	D	102	A	not provided
978	KV	KCNH2	Q12809	D	102	V	not provided
979	KV	KCNH2	Q12809	D	1037	N	not provided
980	KV	KCNH2	Q12809	D	111	V	not provided
981	KV	KCNH2	Q12809	D	119	H	Uncertain significance
982	KV	KCNH2	Q12809	D	144	V	Uncertain significance
983	KV	KCNH2	Q12809	D	16	A	not provided
984	KV	KCNH2	Q12809	D	219	V	Pathogenic
985	KV	KCNH2	Q12809	D	259	N	Uncertain significance
986	KV	KCNH2	Q12809	D	321	Y	Uncertain significance
987	KV	KCNH2	Q12809	D	323	N	Uncertain significance
988	KV	KCNH2	Q12809	D	342	V	not provided
989	KV	KCNH2	Q12809	D	456	Y	not provided
990	KV	KCNH2	Q12809	D	46	N	Likely pathogenic
991	KV	KCNH2	Q12809	D	460	Y	not provided
992	KV	KCNH2	Q12809	D	466	Y	not provided
993	KV	KCNH2	Q12809	D	501	G	Pathogenic
994	KV	KCNH2	Q12809	D	501	H	not provided
995	KV	KCNH2	Q12809	D	501	N	Pathogenic
996	KV	KCNH2	Q12809	D	509	N	Conflicting interpretations of pathogenicity
997	KV	KCNH2	Q12809	D	580	H	Likely pathogenic
998	KV	KCNH2	Q12809	D	609	A	Uncertain significance
999	KV	KCNH2	Q12809	D	609	G	not provided
1000	KV	KCNH2	Q12809	D	609	H	not provided
1001	KV	KCNH2	Q12809	D	609	N	Pathogenic
1002	KV	KCNH2	Q12809	D	609	Y	not provided
1003	KV	KCNH2	Q12809	D	767	Y	not provided
1004	KV	KCNH2	Q12809	D	774	Y	Pathogenic
1005	KV	KCNH2	Q12809	D	837	G	Pathogenic
1006	KV	KCNH2	Q12809	D	837	N	Pathogenic
1007	KV	KCNH2	Q12809	D	837	Y	not provided
1008	KV	KCNH2	Q12809	D	864	G	not provided
1009	KV	KCNH2	Q12809	D	982	N	Uncertain significance
1010	KV	KCNH2	Q12809	E	1119	Q	not provided
1011	KV	KCNH2	Q12809	E	130	K	Uncertain significance
1012	KV	KCNH2	Q12809	E	289	K	Uncertain significance
1013	KV	KCNH2	Q12809	E	444	D	not provided
1014	KV	KCNH2	Q12809	E	444	K	Uncertain significance
1015	KV	KCNH2	Q12809	E	50	D	not provided
1016	KV	KCNH2	Q12809	E	575	G	not provided
1017	KV	KCNH2	Q12809	E	58	A	not provided
1018	KV	KCNH2	Q12809	E	58	D	not provided
1019	KV	KCNH2	Q12809	E	58	G	Pathogenic
1020	KV	KCNH2	Q12809	E	58	K	Likely pathogenic
1021	KV	KCNH2	Q12809	E	637	D	not provided
1022	KV	KCNH2	Q12809	E	637	G	not provided
1023	KV	KCNH2	Q12809	E	637	K	Pathogenic
1024	KV	KCNH2	Q12809	E	788	D	not provided
1025	KV	KCNH2	Q12809	E	788	K	Likely pathogenic
1026	KV	KCNH2	Q12809	E	876	K	Uncertain significance
1027	KV	KCNH2	Q12809	E	904	V	Uncertain significance
1028	KV	KCNH2	Q12809	E	944	D	Uncertain significance
1029	KV	KCNH2	Q12809	E	95	A	Uncertain significance
1030	KV	KCNH2	Q12809	E	978	K	Likely benign
1031	KV	KCNH2	Q12809	F	106	L	not provided
1032	KV	KCNH2	Q12809	F	106	Y	not provided
1033	KV	KCNH2	Q12809	F	125	C	Uncertain significance
1034	KV	KCNH2	Q12809	F	129	L	Pathogenic
1035	KV	KCNH2	Q12809	F	22	S	not provided
1036	KV	KCNH2	Q12809	F	29	L	not provided
1037	KV	KCNH2	Q12809	F	29	S	not provided
1038	KV	KCNH2	Q12809	F	348	Y	Uncertain significance
1039	KV	KCNH2	Q12809	F	431	L	Uncertain significance
1040	KV	KCNH2	Q12809	F	463	L	not provided
1041	KV	KCNH2	Q12809	F	513	L	Uncertain significance
1042	KV	KCNH2	Q12809	F	551	S	Uncertain significance
1043	KV	KCNH2	Q12809	F	617	L	Likely pathogenic
1044	KV	KCNH2	Q12809	F	627	I	not provided
1045	KV	KCNH2	Q12809	F	627	L	not provided
1046	KV	KCNH2	Q12809	F	627	L	Pathogenic
1047	KV	KCNH2	Q12809	F	640	L	Conflicting interpretations of pathogenicity
1048	KV	KCNH2	Q12809	F	640	L	Pathogenic
1049	KV	KCNH2	Q12809	F	640	V	not provided
1050	KV	KCNH2	Q12809	F	656	C	not provided
1051	KV	KCNH2	Q12809	F	68	L	Likely pathogenic
1052	KV	KCNH2	Q12809	F	781	L	Uncertain significance
1053	KV	KCNH2	Q12809	F	805	C	Pathogenic
1054	KV	KCNH2	Q12809	F	805	S	Pathogenic
1055	KV	KCNH2	Q12809	G	1036	D	Uncertain significance
1056	KV	KCNH2	Q12809	G	1154	S	Uncertain significance
1057	KV	KCNH2	Q12809	G	149	A	Uncertain significance
1058	KV	KCNH2	Q12809	G	187	S	not provided
1059	KV	KCNH2	Q12809	G	224	R	Uncertain significance
1060	KV	KCNH2	Q12809	G	236	V	Conflicting interpretations of pathogenicity
1061	KV	KCNH2	Q12809	G	238	S	not provided
1062	KV	KCNH2	Q12809	G	246	C	Likely benign
1063	KV	KCNH2	Q12809	G	294	V	Uncertain significance
1064	KV	KCNH2	Q12809	G	306	R	Likely pathogenic
1065	KV	KCNH2	Q12809	G	306	W	Likely pathogenic
1066	KV	KCNH2	Q12809	G	314	S	not provided
1067	KV	KCNH2	Q12809	G	47	C	Pathogenic
1068	KV	KCNH2	Q12809	G	47	V	not provided
1069	KV	KCNH2	Q12809	G	487	S	Uncertain significance
1070	KV	KCNH2	Q12809	G	522	R	not provided
1071	KV	KCNH2	Q12809	G	53	D	not provided
1072	KV	KCNH2	Q12809	G	53	R	not provided
1073	KV	KCNH2	Q12809	G	53	S	not provided
1074	KV	KCNH2	Q12809	G	572	A	Likely pathogenic
1075	KV	KCNH2	Q12809	G	572	C	not provided
1076	KV	KCNH2	Q12809	G	572	D	not provided
1077	KV	KCNH2	Q12809	G	572	R	Pathogenic
1078	KV	KCNH2	Q12809	G	572	S	Pathogenic
1079	KV	KCNH2	Q12809	G	572	V	Pathogenic
1080	KV	KCNH2	Q12809	G	584	C	Pathogenic
1081	KV	KCNH2	Q12809	G	584	R	not provided
1082	KV	KCNH2	Q12809	G	584	S	Pathogenic
1083	KV	KCNH2	Q12809	G	584	V	not provided
1084	KV	KCNH2	Q12809	G	590	V	not provided
1085	KV	KCNH2	Q12809	G	594	D	not provided
1086	KV	KCNH2	Q12809	G	601	C	not provided
1087	KV	KCNH2	Q12809	G	601	D	Likely pathogenic
1088	KV	KCNH2	Q12809	G	601	S	Pathogenic
1089	KV	KCNH2	Q12809	G	603	D	Uncertain significance
1090	KV	KCNH2	Q12809	G	604	D	not provided
1091	KV	KCNH2	Q12809	G	604	S	Pathogenic
1092	KV	KCNH2	Q12809	G	604	V	Uncertain significance
1093	KV	KCNH2	Q12809	G	626	A	not provided
1094	KV	KCNH2	Q12809	G	626	D	not provided
1095	KV	KCNH2	Q12809	G	626	S	Likely pathogenic
1096	KV	KCNH2	Q12809	G	626	V	not provided
1097	KV	KCNH2	Q12809	G	628	A	not provided
1098	KV	KCNH2	Q12809	G	628	R	Pathogenic
1099	KV	KCNH2	Q12809	G	628	S	Pathogenic
1100	KV	KCNH2	Q12809	G	628	V	not provided
1101	KV	KCNH2	Q12809	G	648	D	Pathogenic
1102	KV	KCNH2	Q12809	G	648	S	not provided
1103	KV	KCNH2	Q12809	G	657	C	not provided
1104	KV	KCNH2	Q12809	G	657	R	not provided
1105	KV	KCNH2	Q12809	G	657	S	Pathogenic
1106	KV	KCNH2	Q12809	G	657	V	Likely pathogenic
1107	KV	KCNH2	Q12809	G	71	E	Likely pathogenic
1108	KV	KCNH2	Q12809	G	71	R	Pathogenic
1109	KV	KCNH2	Q12809	G	749	C	Uncertain significance
1110	KV	KCNH2	Q12809	G	749	V	Conflicting interpretations of pathogenicity
1111	KV	KCNH2	Q12809	G	766	R	Uncertain significance
1112	KV	KCNH2	Q12809	G	766	W	Uncertain significance
1113	KV	KCNH2	Q12809	G	785	A	not provided
1114	KV	KCNH2	Q12809	G	785	V	not provided
1115	KV	KCNH2	Q12809	G	800	E	not provided
1116	KV	KCNH2	Q12809	G	800	W	not provided
1117	KV	KCNH2	Q12809	G	806	A	Pathogenic
1118	KV	KCNH2	Q12809	G	806	E	Pathogenic
1119	KV	KCNH2	Q12809	G	820	R	Pathogenic
1120	KV	KCNH2	Q12809	G	873	S	Likely benign
1121	KV	KCNH2	Q12809	G	879	R	not provided
1122	KV	KCNH2	Q12809	G	903	R	Uncertain significance
1123	KV	KCNH2	Q12809	G	924	A	Uncertain significance
1124	KV	KCNH2	Q12809	G	924	E	Conflicting interpretations of pathogenicity
1125	KV	KCNH2	Q12809	G	924	R	Uncertain significance
1126	KV	KCNH2	Q12809	G	924	W	Uncertain significance
1127	KV	KCNH2	Q12809	G	925	A	Uncertain significance
1128	KV	KCNH2	Q12809	G	925	R	not provided
1129	KV	KCNH2	Q12809	G	925	V	Uncertain significance
1130	KV	KCNH2	Q12809	G	965	R	not provided
1131	KV	KCNH2	Q12809	H	1153	Y	Uncertain significance
1132	KV	KCNH2	Q12809	H	147	R	Uncertain significance
1133	KV	KCNH2	Q12809	H	254	Q	not provided
1134	KV	KCNH2	Q12809	H	309	Y	Uncertain significance
1135	KV	KCNH2	Q12809	H	402	R	Uncertain significance
1136	KV	KCNH2	Q12809	H	492	L	Uncertain significance
1137	KV	KCNH2	Q12809	H	492	Y	not provided
1138	KV	KCNH2	Q12809	H	562	P	not provided
1139	KV	KCNH2	Q12809	H	562	Q	Likely pathogenic
1140	KV	KCNH2	Q12809	H	562	R	Uncertain significance
1141	KV	KCNH2	Q12809	H	562	Y	Conflicting interpretations of pathogenicity
1142	KV	KCNH2	Q12809	H	578	P	Uncertain significance
1143	KV	KCNH2	Q12809	H	687	Y	not provided
1144	KV	KCNH2	Q12809	H	70	N	not provided
1145	KV	KCNH2	Q12809	H	70	R	Pathogenic
1146	KV	KCNH2	Q12809	H	731	P	Likely pathogenic
1147	KV	KCNH2	Q12809	H	739	R	Uncertain significance
1148	KV	KCNH2	Q12809	H	771	R	Uncertain significance
1149	KV	KCNH2	Q12809	I	19	F	Uncertain significance
1150	KV	KCNH2	Q12809	I	30	T	Uncertain significance
1151	KV	KCNH2	Q12809	I	31	N	Likely pathogenic
1152	KV	KCNH2	Q12809	I	31	S	not provided
1153	KV	KCNH2	Q12809	I	31	T	Pathogenic
1154	KV	KCNH2	Q12809	I	359	K	Uncertain significance
1155	KV	KCNH2	Q12809	I	400	N	not provided
1156	KV	KCNH2	Q12809	I	42	N	not provided
1157	KV	KCNH2	Q12809	I	42	T	Pathogenic
1158	KV	KCNH2	Q12809	I	458	F	Uncertain significance
1159	KV	KCNH2	Q12809	I	489	F	not provided
1160	KV	KCNH2	Q12809	I	567	T	Uncertain significance
1161	KV	KCNH2	Q12809	I	571	L	not provided
1162	KV	KCNH2	Q12809	I	571	V	Conflicting interpretations of pathogenicity
1163	KV	KCNH2	Q12809	I	583	V	not provided
1164	KV	KCNH2	Q12809	I	593	K	Pathogenic
1165	KV	KCNH2	Q12809	I	593	R	Pathogenic
1166	KV	KCNH2	Q12809	I	593	T	Pathogenic
1167	KV	KCNH2	Q12809	I	593	V	not provided
1168	KV	KCNH2	Q12809	I	607	F	Likely pathogenic
1169	KV	KCNH2	Q12809	I	655	V	Uncertain significance
1170	KV	KCNH2	Q12809	I	662	T	not provided
1171	KV	KCNH2	Q12809	I	711	V	Pathogenic
1172	KV	KCNH2	Q12809	I	728	F	not provided
1173	KV	KCNH2	Q12809	I	787	N	Conflicting interpretations of pathogenicity
1174	KV	KCNH2	Q12809	I	789	T	Uncertain significance
1175	KV	KCNH2	Q12809	I	82	T	Likely pathogenic
1176	KV	KCNH2	Q12809	I	858	T	not provided
1177	KV	KCNH2	Q12809	I	96	T	not provided
1178	KV	KCNH2	Q12809	I	96	V	not provided
1179	KV	KCNH2	Q12809	K	101	E	Likely pathogenic
1180	KV	KCNH2	Q12809	K	101	N	Pathogenic
1181	KV	KCNH2	Q12809	K	28	E	not provided
1182	KV	KCNH2	Q12809	K	525	N	not provided
1183	KV	KCNH2	Q12809	K	538	E	Uncertain significance
1184	KV	KCNH2	Q12809	K	595	E	not provided
1185	KV	KCNH2	Q12809	K	595	N	not provided
1186	KV	KCNH2	Q12809	K	638	E	not provided
1187	KV	KCNH2	Q12809	K	638	N	not provided
1188	KV	KCNH2	Q12809	K	638	R	Pathogenic
1189	KV	KCNH2	Q12809	K	741	R	Uncertain significance
1190	KV	KCNH2	Q12809	K	757	N	not provided
1191	KV	KCNH2	Q12809	K	897	M	Uncertain significance
1192	KV	KCNH2	Q12809	K	897	T	Benign
1193	KV	KCNH2	Q12809	K	93	R	Likely benign
1194	KV	KCNH2	Q12809	L	1027	I	Likely benign
1195	KV	KCNH2	Q12809	L	1042	P	Likely pathogenic
1196	KV	KCNH2	Q12809	L	1042	V	Uncertain significance
1197	KV	KCNH2	Q12809	L	1045	F	Benign
1198	KV	KCNH2	Q12809	L	1049	P	not provided
1199	KV	KCNH2	Q12809	L	1066	V	not provided
1200	KV	KCNH2	Q12809	L	109	R	not provided
1201	KV	KCNH2	Q12809	L	1108	V	not provided
1202	KV	KCNH2	Q12809	L	1150	M	Uncertain significance
1203	KV	KCNH2	Q12809	L	127	F	Likely pathogenic
1204	KV	KCNH2	Q12809	L	15	Q	Likely pathogenic
1205	KV	KCNH2	Q12809	L	413	P	not provided
1206	KV	KCNH2	Q12809	L	413	R	Likely pathogenic
1207	KV	KCNH2	Q12809	L	499	R	Pathogenic
1208	KV	KCNH2	Q12809	L	523	M	Uncertain significance
1209	KV	KCNH2	Q12809	L	552	S	Pathogenic
1210	KV	KCNH2	Q12809	L	559	F	Pathogenic
1211	KV	KCNH2	Q12809	L	559	H	not provided
1212	KV	KCNH2	Q12809	L	564	P	not provided
1213	KV	KCNH2	Q12809	L	564	Q	Uncertain significance
1214	KV	KCNH2	Q12809	L	602	P	Uncertain significance
1215	KV	KCNH2	Q12809	L	615	F	not provided
1216	KV	KCNH2	Q12809	L	615	V	not provided
1217	KV	KCNH2	Q12809	L	622	F	Uncertain significance
1218	KV	KCNH2	Q12809	L	678	P	Uncertain significance
1219	KV	KCNH2	Q12809	L	69	P	not provided
1220	KV	KCNH2	Q12809	L	69	Q	Uncertain significance
1221	KV	KCNH2	Q12809	L	693	P	Conflicting interpretations of pathogenicity
1222	KV	KCNH2	Q12809	L	724	P	Uncertain significance
1223	KV	KCNH2	Q12809	L	754	R	Uncertain significance
1224	KV	KCNH2	Q12809	L	776	F	Likely pathogenic
1225	KV	KCNH2	Q12809	L	799	P	Likely pathogenic
1226	KV	KCNH2	Q12809	L	842	P	Uncertain significance
1227	KV	KCNH2	Q12809	L	86	P	not provided
1228	KV	KCNH2	Q12809	L	86	R	not provided
1229	KV	KCNH2	Q12809	L	87	P	not provided
1230	KV	KCNH2	Q12809	L	889	V	Conflicting interpretations of pathogenicity
1231	KV	KCNH2	Q12809	L	955	V	Conflicting interpretations of pathogenicity
1232	KV	KCNH2	Q12809	M	1	L	not provided
1233	KV	KCNH2	Q12809	M	1115	V	Uncertain significance
1234	KV	KCNH2	Q12809	M	124	R	not provided
1235	KV	KCNH2	Q12809	M	124	T	not provided
1236	KV	KCNH2	Q12809	M	133	T	Uncertain significance
1237	KV	KCNH2	Q12809	M	218	V	Uncertain significance
1238	KV	KCNH2	Q12809	M	291	R	Uncertain significance
1239	KV	KCNH2	Q12809	M	291	T	not provided
1240	KV	KCNH2	Q12809	M	574	V	not provided
1241	KV	KCNH2	Q12809	M	579	T	not provided
1242	KV	KCNH2	Q12809	M	645	I	Uncertain significance
1243	KV	KCNH2	Q12809	M	645	L	not provided
1244	KV	KCNH2	Q12809	M	645	V	Pathogenic
1245	KV	KCNH2	Q12809	M	651	R	Likely pathogenic
1246	KV	KCNH2	Q12809	M	756	V	not provided
1247	KV	KCNH2	Q12809	N	128	S	Uncertain significance
1248	KV	KCNH2	Q12809	N	257	H	not provided
1249	KV	KCNH2	Q12809	N	317	S	Uncertain significance
1250	KV	KCNH2	Q12809	N	33	T	Likely pathogenic
1251	KV	KCNH2	Q12809	N	45	K	Uncertain significance
1252	KV	KCNH2	Q12809	N	45	Y	not provided
1253	KV	KCNH2	Q12809	N	470	D	Pathogenic
1254	KV	KCNH2	Q12809	N	588	D	not provided
1255	KV	KCNH2	Q12809	N	588	K	Pathogenic
1256	KV	KCNH2	Q12809	N	629	D	Pathogenic
1257	KV	KCNH2	Q12809	N	629	I	not provided
1258	KV	KCNH2	Q12809	N	629	K	not provided
1259	KV	KCNH2	Q12809	N	629	S	Pathogenic
1260	KV	KCNH2	Q12809	N	629	T	Pathogenic
1261	KV	KCNH2	Q12809	N	633	D	not provided
1262	KV	KCNH2	Q12809	N	633	I	not provided
1263	KV	KCNH2	Q12809	N	633	S	Pathogenic
1264	KV	KCNH2	Q12809	N	635	D	not provided
1265	KV	KCNH2	Q12809	N	635	I	not provided
1266	KV	KCNH2	Q12809	N	635	K	not provided
1267	KV	KCNH2	Q12809	N	635	S	Uncertain significance
1268	KV	KCNH2	Q12809	N	658	S	Conflicting interpretations of pathogenicity
1269	KV	KCNH2	Q12809	N	802	S	Uncertain significance
1270	KV	KCNH2	Q12809	N	861	H	not provided
1271	KV	KCNH2	Q12809	N	861	I	Pathogenic
1272	KV	KCNH2	Q12809	N	861	S	Pathogenic
1273	KV	KCNH2	Q12809	N	861	T	not provided
1274	KV	KCNH2	Q12809	N	985	S	Uncertain significance
1275	KV	KCNH2	Q12809	N	996	I	Pathogenic
1276	KV	KCNH2	Q12809	P	1018	A	Uncertain significance
1277	KV	KCNH2	Q12809	P	1020	S	Uncertain significance
1278	KV	KCNH2	Q12809	P	1075	L	Uncertain significance
1279	KV	KCNH2	Q12809	P	1084	L	Uncertain significance
1280	KV	KCNH2	Q12809	P	1093	L	Uncertain significance
1281	KV	KCNH2	Q12809	P	1096	T	Uncertain significance
1282	KV	KCNH2	Q12809	P	1099	L	Uncertain significance
1283	KV	KCNH2	Q12809	P	1101	L	not provided
1284	KV	KCNH2	Q12809	P	1101	S	Uncertain significance
1285	KV	KCNH2	Q12809	P	1122	L	Uncertain significance
1286	KV	KCNH2	Q12809	P	1122	R	Uncertain significance
1287	KV	KCNH2	Q12809	P	1132	A	Uncertain significance
1288	KV	KCNH2	Q12809	P	1139	L	Uncertain significance
1289	KV	KCNH2	Q12809	P	114	S	not provided
1290	KV	KCNH2	Q12809	P	1157	L	Uncertain significance
1291	KV	KCNH2	Q12809	P	1157	S	Uncertain significance
1292	KV	KCNH2	Q12809	P	141	L	Conflicting interpretations of pathogenicity
1293	KV	KCNH2	Q12809	P	150	S	Uncertain significance
1294	KV	KCNH2	Q12809	P	151	A	Uncertain significance
1295	KV	KCNH2	Q12809	P	237	H	Uncertain significance
1296	KV	KCNH2	Q12809	P	240	L	Uncertain significance
1297	KV	KCNH2	Q12809	P	241	L	not provided
1298	KV	KCNH2	Q12809	P	251	A	not provided
1299	KV	KCNH2	Q12809	P	251	S	Uncertain significance
1300	KV	KCNH2	Q12809	P	258	L	Uncertain significance
1301	KV	KCNH2	Q12809	P	297	S	Uncertain significance
1302	KV	KCNH2	Q12809	P	334	L	Pathogenic
1303	KV	KCNH2	Q12809	P	347	S	Conflicting interpretations of pathogenicity
1304	KV	KCNH2	Q12809	P	361	S	Uncertain significance
1305	KV	KCNH2	Q12809	P	426	H	not provided
1306	KV	KCNH2	Q12809	P	440	L	not provided
1307	KV	KCNH2	Q12809	P	451	L	Likely pathogenic
1308	KV	KCNH2	Q12809	P	507	L	Uncertain significance
1309	KV	KCNH2	Q12809	P	507	S	Uncertain significance
1310	KV	KCNH2	Q12809	P	596	A	Pathogenic
1311	KV	KCNH2	Q12809	P	596	H	Pathogenic
1312	KV	KCNH2	Q12809	P	596	L	not provided
1313	KV	KCNH2	Q12809	P	596	R	not provided
1314	KV	KCNH2	Q12809	P	605	L	Uncertain significance
1315	KV	KCNH2	Q12809	P	605	S	not provided
1316	KV	KCNH2	Q12809	P	63	H	Conflicting interpretations of pathogenicity
1317	KV	KCNH2	Q12809	P	632	S	Pathogenic
1318	KV	KCNH2	Q12809	P	72	L	Pathogenic
1319	KV	KCNH2	Q12809	P	72	Q	Conflicting interpretations of pathogenicity
1320	KV	KCNH2	Q12809	P	72	R	Uncertain significance
1321	KV	KCNH2	Q12809	P	72	S	Pathogenic
1322	KV	KCNH2	Q12809	P	721	L	Likely pathogenic
1323	KV	KCNH2	Q12809	P	764	L	Uncertain significance
1324	KV	KCNH2	Q12809	P	846	A	Uncertain significance
1325	KV	KCNH2	Q12809	P	846	L	Uncertain significance
1326	KV	KCNH2	Q12809	P	846	S	Conflicting interpretations of pathogenicity
1327	KV	KCNH2	Q12809	P	846	T	not provided
1328	KV	KCNH2	Q12809	P	869	L	Uncertain significance
1329	KV	KCNH2	Q12809	P	910	L	Uncertain significance
1330	KV	KCNH2	Q12809	P	917	L	Conflicting interpretations of pathogenicity
1331	KV	KCNH2	Q12809	P	923	L	Uncertain significance
1332	KV	KCNH2	Q12809	P	963	T	not provided
1333	KV	KCNH2	Q12809	P	964	A	Uncertain significance
1334	KV	KCNH2	Q12809	P	967	L	Conflicting interpretations of pathogenicity
1335	KV	KCNH2	Q12809	P	968	A	Uncertain significance
1336	KV	KCNH2	Q12809	P	968	L	not provided
1337	KV	KCNH2	Q12809	Q	1068	R	Conflicting interpretations of pathogenicity
1338	KV	KCNH2	Q12809	Q	81	H	Uncertain significance
1339	KV	KCNH2	Q12809	R	100	G	Conflicting interpretations of pathogenicity
1340	KV	KCNH2	Q12809	R	100	Q	Pathogenic
1341	KV	KCNH2	Q12809	R	100	W	not provided
1342	KV	KCNH2	Q12809	R	1005	Q	not provided
1343	KV	KCNH2	Q12809	R	1007	H	Uncertain significance
1344	KV	KCNH2	Q12809	R	1032	Q	Uncertain significance
1345	KV	KCNH2	Q12809	R	1032	W	Uncertain significance
1346	KV	KCNH2	Q12809	R	1033	Q	Uncertain significance
1347	KV	KCNH2	Q12809	R	1033	W	Uncertain significance
1348	KV	KCNH2	Q12809	R	1035	Q	Uncertain significance
1349	KV	KCNH2	Q12809	R	1035	W	Uncertain significance
1350	KV	KCNH2	Q12809	R	1047	C	Uncertain significance
1351	KV	KCNH2	Q12809	R	1047	L	Conflicting interpretations of pathogenicity
1352	KV	KCNH2	Q12809	R	1055	Q	Conflicting interpretations of pathogenicity
1353	KV	KCNH2	Q12809	R	1055	W	Uncertain significance
1354	KV	KCNH2	Q12809	R	1135	H	not provided
1355	KV	KCNH2	Q12809	R	148	Q	Uncertain significance
1356	KV	KCNH2	Q12809	R	148	W	Conflicting interpretations of pathogenicity
1357	KV	KCNH2	Q12809	R	164	H	Uncertain significance
1358	KV	KCNH2	Q12809	R	176	W	Conflicting interpretations of pathogenicity
1359	KV	KCNH2	Q12809	R	181	Q	Benign
1360	KV	KCNH2	Q12809	R	20	G	not provided
1361	KV	KCNH2	Q12809	R	232	L	Uncertain significance
1362	KV	KCNH2	Q12809	R	242	G	not provided
1363	KV	KCNH2	Q12809	R	252	G	not provided
1364	KV	KCNH2	Q12809	R	252	Q	Uncertain significance
1365	KV	KCNH2	Q12809	R	269	W	not provided
1366	KV	KCNH2	Q12809	R	27	H	Likely pathogenic
1367	KV	KCNH2	Q12809	R	27	P	not provided
1368	KV	KCNH2	Q12809	R	271	H	Uncertain significance
1369	KV	KCNH2	Q12809	R	273	Q	not provided
1370	KV	KCNH2	Q12809	R	301	L	not provided
1371	KV	KCNH2	Q12809	R	312	C	Conflicting interpretations of pathogenicity
1372	KV	KCNH2	Q12809	R	312	H	Uncertain significance
1373	KV	KCNH2	Q12809	R	328	C	Conflicting interpretations of pathogenicity
1374	KV	KCNH2	Q12809	R	328	H	Uncertain significance
1375	KV	KCNH2	Q12809	R	356	H	Uncertain significance
1376	KV	KCNH2	Q12809	R	394	H	Uncertain significance
1377	KV	KCNH2	Q12809	R	397	C	Uncertain significance
1378	KV	KCNH2	Q12809	R	472	P	Likely pathogenic
1379	KV	KCNH2	Q12809	R	528	P	not provided
1380	KV	KCNH2	Q12809	R	528	W	Uncertain significance
1381	KV	KCNH2	Q12809	R	531	Q	not provided
1382	KV	KCNH2	Q12809	R	531	W	Uncertain significance
1383	KV	KCNH2	Q12809	R	534	C	Pathogenic
1384	KV	KCNH2	Q12809	R	534	L	not provided
1385	KV	KCNH2	Q12809	R	534	S	Conflicting interpretations of pathogenicity
1386	KV	KCNH2	Q12809	R	537	Q	Likely pathogenic
1387	KV	KCNH2	Q12809	R	537	W	not provided
1388	KV	KCNH2	Q12809	R	56	L	Conflicting interpretations of pathogenicity
1389	KV	KCNH2	Q12809	R	56	Q	Likely pathogenic
1390	KV	KCNH2	Q12809	R	582	C	Pathogenic
1391	KV	KCNH2	Q12809	R	582	L	not provided
1392	KV	KCNH2	Q12809	R	62	Q	not provided
1393	KV	KCNH2	Q12809	R	679	W	Uncertain significance
1394	KV	KCNH2	Q12809	R	685	C	Conflicting interpretations of pathogenicity
1395	KV	KCNH2	Q12809	R	694	H	Likely pathogenic
1396	KV	KCNH2	Q12809	R	696	C	not provided
1397	KV	KCNH2	Q12809	R	696	P	not provided
1398	KV	KCNH2	Q12809	R	734	C	Uncertain significance
1399	KV	KCNH2	Q12809	R	752	Q	Likely pathogenic
1400	KV	KCNH2	Q12809	R	752	W	Pathogenic
1401	KV	KCNH2	Q12809	R	784	W	Likely pathogenic
1402	KV	KCNH2	Q12809	R	791	W	Conflicting interpretations of pathogenicity
1403	KV	KCNH2	Q12809	R	823	Q	Likely pathogenic
1404	KV	KCNH2	Q12809	R	823	W	Pathogenic
1405	KV	KCNH2	Q12809	R	835	Q	Likely pathogenic
1406	KV	KCNH2	Q12809	R	835	W	not provided
1407	KV	KCNH2	Q12809	R	885	C	Uncertain significance
1408	KV	KCNH2	Q12809	R	885	H	Uncertain significance
1409	KV	KCNH2	Q12809	R	887	C	Uncertain significance
1410	KV	KCNH2	Q12809	R	887	H	Conflicting interpretations of pathogenicity
1411	KV	KCNH2	Q12809	R	892	C	Conflicting interpretations of pathogenicity
1412	KV	KCNH2	Q12809	R	894	C	Pathogenic
1413	KV	KCNH2	Q12809	R	894	H	Uncertain significance
1414	KV	KCNH2	Q12809	R	894	L	not provided
1415	KV	KCNH2	Q12809	R	912	Q	Uncertain significance
1416	KV	KCNH2	Q12809	R	912	W	Uncertain significance
1417	KV	KCNH2	Q12809	R	92	C	Uncertain significance
1418	KV	KCNH2	Q12809	R	92	L	Likely pathogenic
1419	KV	KCNH2	Q12809	R	920	G	Uncertain significance
1420	KV	KCNH2	Q12809	R	920	Q	Uncertain significance
1421	KV	KCNH2	Q12809	R	920	W	Uncertain significance
1422	KV	KCNH2	Q12809	R	922	Q	Uncertain significance
1423	KV	KCNH2	Q12809	R	922	W	not provided
1424	KV	KCNH2	Q12809	R	948	C	Pathogenic
1425	KV	KCNH2	Q12809	R	948	H	Pathogenic
1426	KV	KCNH2	Q12809	R	948	S	not provided
1427	KV	KCNH2	Q12809	R	954	C	Conflicting interpretations of pathogenicity
1428	KV	KCNH2	Q12809	R	954	H	Uncertain significance
1429	KV	KCNH2	Q12809	S	1021	G	Uncertain significance
1430	KV	KCNH2	Q12809	S	104	R	Uncertain significance
1431	KV	KCNH2	Q12809	S	1040	G	not provided
1432	KV	KCNH2	Q12809	S	1040	N	Uncertain significance
1433	KV	KCNH2	Q12809	S	1155	L	Uncertain significance
1434	KV	KCNH2	Q12809	S	182	W	Uncertain significance
1435	KV	KCNH2	Q12809	S	26	I	not provided
1436	KV	KCNH2	Q12809	S	275	R	Uncertain significance
1437	KV	KCNH2	Q12809	S	320	L	not provided
1438	KV	KCNH2	Q12809	S	320	W	Uncertain significance
1439	KV	KCNH2	Q12809	S	428	L	not provided
1440	KV	KCNH2	Q12809	S	428	P	Likely pathogenic
1441	KV	KCNH2	Q12809	S	55	L	Pathogenic
1442	KV	KCNH2	Q12809	S	581	L	Uncertain significance
1443	KV	KCNH2	Q12809	S	599	R	not provided
1444	KV	KCNH2	Q12809	S	606	P	not provided
1445	KV	KCNH2	Q12809	S	621	N	not provided
1446	KV	KCNH2	Q12809	S	621	R	not provided
1447	KV	KCNH2	Q12809	S	631	A	not provided
1448	KV	KCNH2	Q12809	S	631	F	Uncertain significance
1449	KV	KCNH2	Q12809	S	641	F	not provided
1450	KV	KCNH2	Q12809	S	649	F	not provided
1451	KV	KCNH2	Q12809	S	649	P	not provided
1452	KV	KCNH2	Q12809	S	660	L	Conflicting interpretations of pathogenicity
1453	KV	KCNH2	Q12809	S	706	C	not provided
1454	KV	KCNH2	Q12809	S	706	F	not provided
1455	KV	KCNH2	Q12809	S	735	L	Conflicting interpretations of pathogenicity
1456	KV	KCNH2	Q12809	S	818	L	Pathogenic
1457	KV	KCNH2	Q12809	S	818	P	not provided
1458	KV	KCNH2	Q12809	S	906	L	Uncertain significance
1459	KV	KCNH2	Q12809	S	930	R	Uncertain significance
1460	KV	KCNH2	Q12809	S	937	N	Uncertain significance
1461	KV	KCNH2	Q12809	S	960	N	not provided
1462	KV	KCNH2	Q12809	S	981	G	Conflicting interpretations of pathogenicity
1463	KV	KCNH2	Q12809	T	1054	I	Uncertain significance
1464	KV	KCNH2	Q12809	T	1062	I	Uncertain significance
1465	KV	KCNH2	Q12809	T	1072	M	Uncertain significance
1466	KV	KCNH2	Q12809	T	1083	A	Uncertain significance
1467	KV	KCNH2	Q12809	T	1102	I	Uncertain significance
1468	KV	KCNH2	Q12809	T	1146	S	Uncertain significance
1469	KV	KCNH2	Q12809	T	152	S	Uncertain significance
1470	KV	KCNH2	Q12809	T	201	M	Uncertain significance
1471	KV	KCNH2	Q12809	T	216	I	Uncertain significance
1472	KV	KCNH2	Q12809	T	367	S	not provided
1473	KV	KCNH2	Q12809	T	421	K	Pathogenic
1474	KV	KCNH2	Q12809	T	421	M	Conflicting interpretations of pathogenicity
1475	KV	KCNH2	Q12809	T	436	M	Uncertain significance
1476	KV	KCNH2	Q12809	T	473	N	not provided
1477	KV	KCNH2	Q12809	T	473	P	not provided
1478	KV	KCNH2	Q12809	T	474	I	Pathogenic
1479	KV	KCNH2	Q12809	T	613	M	Pathogenic
1480	KV	KCNH2	Q12809	T	613	S	Pathogenic
1481	KV	KCNH2	Q12809	T	618	I	not provided
1482	KV	KCNH2	Q12809	T	618	S	not provided
1483	KV	KCNH2	Q12809	T	623	I	not provided
1484	KV	KCNH2	Q12809	T	634	A	Pathogenic
1485	KV	KCNH2	Q12809	T	634	I	not provided
1486	KV	KCNH2	Q12809	T	65	P	Pathogenic
1487	KV	KCNH2	Q12809	T	65	S	Uncertain significance
1488	KV	KCNH2	Q12809	T	708	A	Uncertain significance
1489	KV	KCNH2	Q12809	T	74	M	Likely pathogenic
1490	KV	KCNH2	Q12809	T	74	P	not provided
1491	KV	KCNH2	Q12809	T	74	R	Pathogenic
1492	KV	KCNH2	Q12809	T	826	I	Pathogenic
1493	KV	KCNH2	Q12809	T	859	I	Uncertain significance
1494	KV	KCNH2	Q12809	T	875	M	Likely benign
1495	KV	KCNH2	Q12809	T	895	M	Uncertain significance
1496	KV	KCNH2	Q12809	T	899	R	Uncertain significance
1497	KV	KCNH2	Q12809	T	983	I	Conflicting interpretations of pathogenicity
1498	KV	KCNH2	Q12809	V	1038	L	Uncertain significance
1499	KV	KCNH2	Q12809	V	1038	M	Uncertain significance
1500	KV	KCNH2	Q12809	V	1097	I	Uncertain significance
1501	KV	KCNH2	Q12809	V	115	G	Pathogenic
1502	KV	KCNH2	Q12809	V	115	M	Uncertain significance
1503	KV	KCNH2	Q12809	V	215	G	not provided
1504	KV	KCNH2	Q12809	V	279	M	not provided
1505	KV	KCNH2	Q12809	V	325	M	Uncertain significance
1506	KV	KCNH2	Q12809	V	409	E	Uncertain significance
1507	KV	KCNH2	Q12809	V	409	M	Uncertain significance
1508	KV	KCNH2	Q12809	V	41	A	not provided
1509	KV	KCNH2	Q12809	V	41	F	not provided
1510	KV	KCNH2	Q12809	V	41	L	Likely pathogenic
1511	KV	KCNH2	Q12809	V	465	A	Uncertain significance
1512	KV	KCNH2	Q12809	V	476	I	Uncertain significance
1513	KV	KCNH2	Q12809	V	491	I	Conflicting interpretations of pathogenicity
1514	KV	KCNH2	Q12809	V	533	G	Benign
1515	KV	KCNH2	Q12809	V	535	L	Uncertain significance
1516	KV	KCNH2	Q12809	V	535	M	Uncertain significance
1517	KV	KCNH2	Q12809	V	612	L	not provided
1518	KV	KCNH2	Q12809	V	625	E	not provided
1519	KV	KCNH2	Q12809	V	630	A	not provided
1520	KV	KCNH2	Q12809	V	630	I	Likely pathogenic
1521	KV	KCNH2	Q12809	V	630	L	not provided
1522	KV	KCNH2	Q12809	V	644	F	not provided
1523	KV	KCNH2	Q12809	V	644	L	not provided
1524	KV	KCNH2	Q12809	V	770	A	not provided
1525	KV	KCNH2	Q12809	V	794	I	Uncertain significance
1526	KV	KCNH2	Q12809	V	796	G	Uncertain significance
1527	KV	KCNH2	Q12809	V	822	L	Pathogenic
1528	KV	KCNH2	Q12809	V	822	M	Pathogenic
1529	KV	KCNH2	Q12809	V	94	G	not provided
1530	KV	KCNH2	Q12809	W	410	S	not provided
1531	KV	KCNH2	Q12809	W	563	C	not provided
1532	KV	KCNH2	Q12809	W	563	C	Uncertain significance
1533	KV	KCNH2	Q12809	W	563	G	not provided
1534	KV	KCNH2	Q12809	W	568	C	not provided
1535	KV	KCNH2	Q12809	W	568	C	Uncertain significance
1536	KV	KCNH2	Q12809	W	568	R	not provided
1537	KV	KCNH2	Q12809	W	568	S	Uncertain significance
1538	KV	KCNH2	Q12809	W	585	C	Likely pathogenic
1539	KV	KCNH2	Q12809	W	585	C	not provided
1540	KV	KCNH2	Q12809	W	585	L	Likely pathogenic
1541	KV	KCNH2	Q12809	W	927	L	Uncertain significance
1542	KV	KCNH2	Q12809	Y	1078	C	Uncertain significance
1543	KV	KCNH2	Q12809	Y	327	C	Uncertain significance
1544	KV	KCNH2	Q12809	Y	420	C	not provided
1545	KV	KCNH2	Q12809	Y	427	C	Likely pathogenic
1546	KV	KCNH2	Q12809	Y	427	H	not provided
1547	KV	KCNH2	Q12809	Y	427	S	Likely pathogenic
1548	KV	KCNH2	Q12809	Y	43	C	Pathogenic
1549	KV	KCNH2	Q12809	Y	43	D	not provided
1550	KV	KCNH2	Q12809	Y	475	C	not provided
1551	KV	KCNH2	Q12809	Y	493	C	Likely pathogenic
1552	KV	KCNH2	Q12809	Y	493	F	not provided
1553	KV	KCNH2	Q12809	Y	493	S	not provided
1554	KV	KCNH2	Q12809	Y	54	H	not provided
1555	KV	KCNH2	Q12809	Y	569	H	not provided
1556	KV	KCNH2	Q12809	Y	597	C	Likely pathogenic
1557	KV	KCNH2	Q12809	Y	611	D	Likely pathogenic
1558	KV	KCNH2	Q12809	Y	611	H	Pathogenic
1559	KV	KCNH2	Q12809	Y	616	C	Pathogenic
1560	KV	KCNH2	Q12809	Y	99	C	Pathogenic
1561	KV	KCNH2	Q12809	Y	99	S	not provided
1562	KV	KCNH5	Q8NCM2	A	246	S	Uncertain significance
1563	KV	KCNH5	Q8NCM2	A	335	T	Uncertain significance
1564	KV	KCNH5	Q8NCM2	A	878	T	Uncertain significance
1565	KV	KCNH5	Q8NCM2	D	791	G	Uncertain significance
1566	KV	KCNH5	Q8NCM2	D	984	V	Uncertain significance
1567	KV	KCNH5	Q8NCM2	E	772	G	Benign
1568	KV	KCNH5	Q8NCM2	E	89	Q	Uncertain significance
1569	KV	KCNH5	Q8NCM2	G	789	C	Likely benign
1570	KV	KCNH5	Q8NCM2	I	245	V	Uncertain significance
1571	KV	KCNH5	Q8NCM2	I	366	M	Benign
1572	KV	KCNH5	Q8NCM2	I	616	N	Uncertain significance
1573	KV	KCNH5	Q8NCM2	I	938	V	Uncertain significance
1574	KV	KCNH5	Q8NCM2	K	945	E	Uncertain significance
1575	KV	KCNH5	Q8NCM2	L	553	S	Uncertain significance
1576	KV	KCNH5	Q8NCM2	M	447	V	Uncertain significance
1577	KV	KCNH5	Q8NCM2	M	928	V	Uncertain significance
1578	KV	KCNH5	Q8NCM2	P	204	L	Uncertain significance
1579	KV	KCNH5	Q8NCM2	P	705	R	Uncertain significance
1580	KV	KCNH5	Q8NCM2	P	962	S	Uncertain significance
1581	KV	KCNH5	Q8NCM2	Q	964	E	Uncertain significance
1582	KV	KCNH5	Q8NCM2	Q	964	K	Uncertain significance
1583	KV	KCNH5	Q8NCM2	R	154	W	Uncertain significance
1584	KV	KCNH5	Q8NCM2	R	327	H	Uncertain significance
1585	KV	KCNH5	Q8NCM2	R	813	Q	Uncertain significance
1586	KV	KCNH5	Q8NCM2	S	449	L	Uncertain significance
1587	KV	KCNH5	Q8NCM2	S	699	G	Uncertain significance
1588	KV	KCNH5	Q8NCM2	S	699	R	Uncertain significance
1589	KV	KCNH5	Q8NCM2	S	746	P	Uncertain significance
1590	KV	KCNH5	Q8NCM2	S	943	L	Uncertain significance
1591	KV	KCNH5	Q8NCM2	T	167	M	Uncertain significance
1592	KV	KCNH5	Q8NCM2	T	770	N	Uncertain significance
1593	KV	KCNH5	Q8NCM2	V	184	I	Uncertain significance
1594	KV	KCNH5	Q8NCM2	V	256	I	Uncertain significance
1595	KV	KCNH5	Q8NCM2	V	263	I	Uncertain significance
1596	KV	KCNH7	Q9NS40	R	394	H	Uncertain significance
1597	KV	KCNQ1	P51787	A	10	D	Uncertain significance
1598	KV	KCNQ1	P51787	A	150	G	not provided
1599	KV	KCNQ1	P51787	A	178	P	Pathogenic
1600	KV	KCNQ1	P51787	A	178	T	Conflicting interpretations of pathogenicity
1601	KV	KCNQ1	P51787	A	194	P	Uncertain significance
1602	KV	KCNQ1	P51787	A	2	G	Likely pathogenic
1603	KV	KCNQ1	P51787	A	2	V	Uncertain significance
1604	KV	KCNQ1	P51787	A	226	V	Uncertain significance
1605	KV	KCNQ1	P51787	A	283	G	Uncertain significance
1606	KV	KCNQ1	P51787	A	283	P	Uncertain significance
1607	KV	KCNQ1	P51787	A	287	E	Uncertain significance
1608	KV	KCNQ1	P51787	A	3	G	Uncertain significance
1609	KV	KCNQ1	P51787	A	300	E	Uncertain significance
1610	KV	KCNQ1	P51787	A	300	T	Conflicting interpretations of pathogenicity
1611	KV	KCNQ1	P51787	A	302	E	Conflicting interpretations of pathogenicity
1612	KV	KCNQ1	P51787	A	302	T	not provided
1613	KV	KCNQ1	P51787	A	302	V	Likely pathogenic
1614	KV	KCNQ1	P51787	A	329	T	Uncertain significance
1615	KV	KCNQ1	P51787	A	341	E	Pathogenic
1616	KV	KCNQ1	P51787	A	341	G	Pathogenic
1617	KV	KCNQ1	P51787	A	341	V	Pathogenic
1618	KV	KCNQ1	P51787	A	344	E	Likely pathogenic
1619	KV	KCNQ1	P51787	A	344	G	Likely pathogenic
1620	KV	KCNQ1	P51787	A	344	T	Likely pathogenic
1621	KV	KCNQ1	P51787	A	344	V	Pathogenic
1622	KV	KCNQ1	P51787	A	371	P	Uncertain significance
1623	KV	KCNQ1	P51787	A	371	T	not provided
1624	KV	KCNQ1	P51787	A	372	D	not provided
1625	KV	KCNQ1	P51787	A	399	G	Uncertain significance
1626	KV	KCNQ1	P51787	A	46	T	Uncertain significance
1627	KV	KCNQ1	P51787	A	486	P	Uncertain significance
1628	KV	KCNQ1	P51787	A	525	T	Pathogenic
1629	KV	KCNQ1	P51787	A	525	V	not provided
1630	KV	KCNQ1	P51787	A	590	P	Uncertain significance
1631	KV	KCNQ1	P51787	A	590	T	Likely pathogenic
1632	KV	KCNQ1	P51787	A	62	T	Likely benign
1633	KV	KCNQ1	P51787	C	122	Y	Pathogenic
1634	KV	KCNQ1	P51787	C	136	F	not provided
1635	KV	KCNQ1	P51787	C	381	Y	Likely pathogenic
1636	KV	KCNQ1	P51787	C	642	W	Uncertain significance
1637	KV	KCNQ1	P51787	D	202	G	Pathogenic
1638	KV	KCNQ1	P51787	D	202	H	not provided
1639	KV	KCNQ1	P51787	D	202	N	Pathogenic
1640	KV	KCNQ1	P51787	D	242	N	Pathogenic
1641	KV	KCNQ1	P51787	D	242	Y	Likely pathogenic
1642	KV	KCNQ1	P51787	D	301	V	Likely pathogenic
1643	KV	KCNQ1	P51787	D	317	G	not provided
1644	KV	KCNQ1	P51787	D	317	N	Pathogenic
1645	KV	KCNQ1	P51787	D	317	Y	not provided
1646	KV	KCNQ1	P51787	D	428	G	not provided
1647	KV	KCNQ1	P51787	D	446	E	not provided
1648	KV	KCNQ1	P51787	D	446	N	Pathogenic
1649	KV	KCNQ1	P51787	D	488	E	Uncertain significance
1650	KV	KCNQ1	P51787	D	564	G	Likely pathogenic
1651	KV	KCNQ1	P51787	D	611	N	Conflicting interpretations of pathogenicity
1652	KV	KCNQ1	P51787	D	611	Y	not provided
1653	KV	KCNQ1	P51787	D	673	N	Uncertain significance
1654	KV	KCNQ1	P51787	E	11	K	Conflicting interpretations of pathogenicity
1655	KV	KCNQ1	P51787	E	115	G	not provided
1656	KV	KCNQ1	P51787	E	115	K	Pathogenic
1657	KV	KCNQ1	P51787	E	146	G	Likely pathogenic
1658	KV	KCNQ1	P51787	E	146	K	not provided
1659	KV	KCNQ1	P51787	E	160	K	not provided
1660	KV	KCNQ1	P51787	E	160	V	not provided
1661	KV	KCNQ1	P51787	E	261	D	not provided
1662	KV	KCNQ1	P51787	E	261	K	not provided
1663	KV	KCNQ1	P51787	E	261	Q	Likely pathogenic
1664	KV	KCNQ1	P51787	E	284	K	Conflicting interpretations of pathogenicity
1665	KV	KCNQ1	P51787	E	290	K	Uncertain significance
1666	KV	KCNQ1	P51787	E	385	K	not provided
1667	KV	KCNQ1	P51787	E	450	G	Uncertain significance
1668	KV	KCNQ1	P51787	E	543	K	not provided
1669	KV	KCNQ1	P51787	E	578	K	Uncertain significance
1670	KV	KCNQ1	P51787	E	596	G	Pathogenic
1671	KV	KCNQ1	P51787	E	596	K	not provided
1672	KV	KCNQ1	P51787	F	127	L	not provided
1673	KV	KCNQ1	P51787	F	157	C	not provided
1674	KV	KCNQ1	P51787	F	193	L	not provided
1675	KV	KCNQ1	P51787	F	275	S	not provided
1676	KV	KCNQ1	P51787	F	279	I	Pathogenic
1677	KV	KCNQ1	P51787	F	296	S	not provided
1678	KV	KCNQ1	P51787	F	335	L	not provided
1679	KV	KCNQ1	P51787	F	339	S	Pathogenic
1680	KV	KCNQ1	P51787	F	339	Y	Uncertain significance
1681	KV	KCNQ1	P51787	F	351	L	Pathogenic
1682	KV	KCNQ1	P51787	F	351	S	not provided
1683	KV	KCNQ1	P51787	F	573	L	not provided
1684	KV	KCNQ1	P51787	G	119	D	not provided
1685	KV	KCNQ1	P51787	G	119	R	Conflicting interpretations of pathogenicity
1686	KV	KCNQ1	P51787	G	168	R	Pathogenic
1687	KV	KCNQ1	P51787	G	179	A	Likely pathogenic
1688	KV	KCNQ1	P51787	G	179	S	Conflicting interpretations of pathogenicity
1689	KV	KCNQ1	P51787	G	186	C	Likely pathogenic
1690	KV	KCNQ1	P51787	G	186	D	Pathogenic
1691	KV	KCNQ1	P51787	G	186	R	not provided
1692	KV	KCNQ1	P51787	G	186	S	not provided
1693	KV	KCNQ1	P51787	G	186	V	Pathogenic
1694	KV	KCNQ1	P51787	G	189	E	not provided
1695	KV	KCNQ1	P51787	G	189	R	Likely pathogenic
1696	KV	KCNQ1	P51787	G	189	R	not provided
1697	KV	KCNQ1	P51787	G	22	R	Uncertain significance
1698	KV	KCNQ1	P51787	G	229	D	Pathogenic
1699	KV	KCNQ1	P51787	G	269	D	Pathogenic
1700	KV	KCNQ1	P51787	G	269	R	Pathogenic
1701	KV	KCNQ1	P51787	G	269	S	Pathogenic
1702	KV	KCNQ1	P51787	G	269	V	Pathogenic
1703	KV	KCNQ1	P51787	G	272	D	Pathogenic
1704	KV	KCNQ1	P51787	G	272	V	not provided
1705	KV	KCNQ1	P51787	G	292	D	Uncertain significance
1706	KV	KCNQ1	P51787	G	297	S	not provided
1707	KV	KCNQ1	P51787	G	306	R	not provided
1708	KV	KCNQ1	P51787	G	306	R	Pathogenic
1709	KV	KCNQ1	P51787	G	306	V	not provided
1710	KV	KCNQ1	P51787	G	314	A	not provided
1711	KV	KCNQ1	P51787	G	314	C	not provided
1712	KV	KCNQ1	P51787	G	314	D	not provided
1713	KV	KCNQ1	P51787	G	314	R	Pathogenic
1714	KV	KCNQ1	P51787	G	314	S	Pathogenic
1715	KV	KCNQ1	P51787	G	316	E	not provided
1716	KV	KCNQ1	P51787	G	316	R	not provided
1717	KV	KCNQ1	P51787	G	316	R	Pathogenic
1718	KV	KCNQ1	P51787	G	316	V	not provided
1719	KV	KCNQ1	P51787	G	316	W	Pathogenic
1720	KV	KCNQ1	P51787	G	325	E	Likely pathogenic
1721	KV	KCNQ1	P51787	G	325	R	Pathogenic
1722	KV	KCNQ1	P51787	G	345	E	Pathogenic
1723	KV	KCNQ1	P51787	G	345	R	Likely pathogenic
1724	KV	KCNQ1	P51787	G	345	R	Pathogenic
1725	KV	KCNQ1	P51787	G	350	R	not provided
1726	KV	KCNQ1	P51787	G	350	V	Likely pathogenic
1727	KV	KCNQ1	P51787	G	460	S	Uncertain significance
1728	KV	KCNQ1	P51787	G	548	D	not provided
1729	KV	KCNQ1	P51787	G	568	A	Pathogenic
1730	KV	KCNQ1	P51787	G	568	R	Likely pathogenic
1731	KV	KCNQ1	P51787	G	568	R	Pathogenic
1732	KV	KCNQ1	P51787	G	57	V	not provided
1733	KV	KCNQ1	P51787	G	584	S	not provided
1734	KV	KCNQ1	P51787	G	589	D	Pathogenic
1735	KV	KCNQ1	P51787	G	621	S	Uncertain significance
1736	KV	KCNQ1	P51787	G	626	S	Uncertain significance
1737	KV	KCNQ1	P51787	G	629	S	Uncertain significance
1738	KV	KCNQ1	P51787	G	635	R	Uncertain significance
1739	KV	KCNQ1	P51787	G	643	S	Benign
1740	KV	KCNQ1	P51787	H	105	L	not provided
1741	KV	KCNQ1	P51787	H	126	L	Conflicting interpretations of pathogenicity
1742	KV	KCNQ1	P51787	H	258	N	not provided
1743	KV	KCNQ1	P51787	H	258	P	not provided
1744	KV	KCNQ1	P51787	H	258	R	Pathogenic
1745	KV	KCNQ1	P51787	H	363	N	Pathogenic
1746	KV	KCNQ1	P51787	H	455	Y	not provided
1747	KV	KCNQ1	P51787	I	132	L	not provided
1748	KV	KCNQ1	P51787	I	198	V	Pathogenic
1749	KV	KCNQ1	P51787	I	204	F	not provided
1750	KV	KCNQ1	P51787	I	204	M	Likely pathogenic
1751	KV	KCNQ1	P51787	I	227	L	Likely pathogenic
1752	KV	KCNQ1	P51787	I	235	N	Pathogenic
1753	KV	KCNQ1	P51787	I	268	S	Uncertain significance
1754	KV	KCNQ1	P51787	I	268	V	Uncertain significance
1755	KV	KCNQ1	P51787	I	274	V	Conflicting interpretations of pathogenicity
1756	KV	KCNQ1	P51787	I	313	M	not provided
1757	KV	KCNQ1	P51787	I	337	F	Likely pathogenic
1758	KV	KCNQ1	P51787	I	337	M	Uncertain significance
1759	KV	KCNQ1	P51787	I	375	F	Likely pathogenic
1760	KV	KCNQ1	P51787	I	514	T	not provided
1761	KV	KCNQ1	P51787	I	517	T	not provided
1762	KV	KCNQ1	P51787	I	567	S	not provided
1763	KV	KCNQ1	P51787	I	567	T	Pathogenic
1764	KV	KCNQ1	P51787	I	588	F	Pathogenic
1765	KV	KCNQ1	P51787	I	588	T	Likely pathogenic
1766	KV	KCNQ1	P51787	K	13	R	Uncertain significance
1767	KV	KCNQ1	P51787	K	183	R	not provided
1768	KV	KCNQ1	P51787	K	196	T	Uncertain significance
1769	KV	KCNQ1	P51787	K	218	E	Uncertain significance
1770	KV	KCNQ1	P51787	K	318	N	Pathogenic
1771	KV	KCNQ1	P51787	K	318	T	Uncertain significance
1772	KV	KCNQ1	P51787	K	354	R	not provided
1773	KV	KCNQ1	P51787	K	362	R	Pathogenic
1774	KV	KCNQ1	P51787	K	393	M	Conflicting interpretations of pathogenicity
1775	KV	KCNQ1	P51787	K	393	N	Conflicting interpretations of pathogenicity
1776	KV	KCNQ1	P51787	K	398	R	Uncertain significance
1777	KV	KCNQ1	P51787	K	422	T	not provided
1778	KV	KCNQ1	P51787	K	515	N	Likely pathogenic
1779	KV	KCNQ1	P51787	K	526	E	Uncertain significance
1780	KV	KCNQ1	P51787	K	526	N	Uncertain significance
1781	KV	KCNQ1	P51787	K	557	E	Pathogenic
1782	KV	KCNQ1	P51787	K	569	E	not provided
1783	KV	KCNQ1	P51787	K	598	R	not provided
1784	KV	KCNQ1	P51787	L	114	P	not provided
1785	KV	KCNQ1	P51787	L	131	P	Uncertain significance
1786	KV	KCNQ1	P51787	L	134	P	Pathogenic
1787	KV	KCNQ1	P51787	L	137	F	Pathogenic
1788	KV	KCNQ1	P51787	L	175	F	Uncertain significance
1789	KV	KCNQ1	P51787	L	187	P	Conflicting interpretations of pathogenicity
1790	KV	KCNQ1	P51787	L	191	P	not provided
1791	KV	KCNQ1	P51787	L	203	P	Likely pathogenic
1792	KV	KCNQ1	P51787	L	236	P	Likely pathogenic
1793	KV	KCNQ1	P51787	L	236	R	Likely pathogenic
1794	KV	KCNQ1	P51787	L	239	P	not provided
1795	KV	KCNQ1	P51787	L	250	H	not provided
1796	KV	KCNQ1	P51787	L	250	P	not provided
1797	KV	KCNQ1	P51787	L	251	P	Pathogenic
1798	KV	KCNQ1	P51787	L	262	V	not provided
1799	KV	KCNQ1	P51787	L	266	P	Pathogenic
1800	KV	KCNQ1	P51787	L	266	R	Likely pathogenic
1801	KV	KCNQ1	P51787	L	273	F	Pathogenic
1802	KV	KCNQ1	P51787	L	273	P	Uncertain significance
1803	KV	KCNQ1	P51787	L	273	R	not provided
1804	KV	KCNQ1	P51787	L	282	P	not provided
1805	KV	KCNQ1	P51787	L	303	P	not provided
1806	KV	KCNQ1	P51787	L	342	F	Pathogenic
1807	KV	KCNQ1	P51787	L	342	H	Uncertain significance
1808	KV	KCNQ1	P51787	L	353	P	Pathogenic
1809	KV	KCNQ1	P51787	L	374	H	Uncertain significance
1810	KV	KCNQ1	P51787	L	602	P	not provided
1811	KV	KCNQ1	P51787	L	608	V	Uncertain significance
1812	KV	KCNQ1	P51787	L	619	M	Uncertain significance
1813	KV	KCNQ1	P51787	M	1	K	Pathogenic
1814	KV	KCNQ1	P51787	M	1	L	Pathogenic
1815	KV	KCNQ1	P51787	M	1	T	not provided
1816	KV	KCNQ1	P51787	M	1	V	not provided
1817	KV	KCNQ1	P51787	M	210	T	Uncertain significance
1818	KV	KCNQ1	P51787	M	476	V	Uncertain significance
1819	KV	KCNQ1	P51787	M	520	R	Pathogenic
1820	KV	KCNQ1	P51787	M	612	I	Uncertain significance
1821	KV	KCNQ1	P51787	N	365	H	not provided
1822	KV	KCNQ1	P51787	N	429	S	Uncertain significance
1823	KV	KCNQ1	P51787	N	483	S	Uncertain significance
1824	KV	KCNQ1	P51787	N	586	D	not provided
1825	KV	KCNQ1	P51787	N	657	S	Uncertain significance
1826	KV	KCNQ1	P51787	P	117	L	Pathogenic
1827	KV	KCNQ1	P51787	P	117	S	Likely pathogenic
1828	KV	KCNQ1	P51787	P	197	H	Uncertain significance
1829	KV	KCNQ1	P51787	P	197	L	Uncertain significance
1830	KV	KCNQ1	P51787	P	197	S	Uncertain significance
1831	KV	KCNQ1	P51787	P	320	A	not provided
1832	KV	KCNQ1	P51787	P	320	H	not provided
1833	KV	KCNQ1	P51787	P	320	S	Conflicting interpretations of pathogenicity
1834	KV	KCNQ1	P51787	P	343	L	not provided
1835	KV	KCNQ1	P51787	P	343	R	not provided
1836	KV	KCNQ1	P51787	P	343	S	not provided
1837	KV	KCNQ1	P51787	P	369	A	Uncertain significance
1838	KV	KCNQ1	P51787	P	400	A	Uncertain significance
1839	KV	KCNQ1	P51787	P	408	A	Benign
1840	KV	KCNQ1	P51787	P	441	S	Uncertain significance
1841	KV	KCNQ1	P51787	P	447	H	Uncertain significance
1842	KV	KCNQ1	P51787	P	448	L	Conflicting interpretations of pathogenicity
1843	KV	KCNQ1	P51787	P	448	Q	Uncertain significance
1844	KV	KCNQ1	P51787	P	448	R	Benign
1845	KV	KCNQ1	P51787	P	477	L	not provided
1846	KV	KCNQ1	P51787	P	59	A	Uncertain significance
1847	KV	KCNQ1	P51787	P	61	T	Uncertain significance
1848	KV	KCNQ1	P51787	P	630	A	not provided
1849	KV	KCNQ1	P51787	P	64	S	Uncertain significance
1850	KV	KCNQ1	P51787	P	660	H	Uncertain significance
1851	KV	KCNQ1	P51787	P	7	S	Conflicting interpretations of pathogenicity
1852	KV	KCNQ1	P51787	P	70	T	Uncertain significance
1853	KV	KCNQ1	P51787	P	73	T	Uncertain significance
1854	KV	KCNQ1	P51787	P	81	L	Uncertain significance
1855	KV	KCNQ1	P51787	P	84	R	Uncertain significance
1856	KV	KCNQ1	P51787	P	99	R	Uncertain significance
1857	KV	KCNQ1	P51787	Q	107	H	Likely pathogenic
1858	KV	KCNQ1	P51787	Q	147	R	not provided
1859	KV	KCNQ1	P51787	Q	234	L	Uncertain significance
1860	KV	KCNQ1	P51787	Q	234	P	Uncertain significance
1861	KV	KCNQ1	P51787	Q	234	R	Uncertain significance
1862	KV	KCNQ1	P51787	Q	321	P	Uncertain significance
1863	KV	KCNQ1	P51787	Q	357	E	Uncertain significance
1864	KV	KCNQ1	P51787	Q	357	R	not provided
1865	KV	KCNQ1	P51787	Q	359	P	Likely pathogenic
1866	KV	KCNQ1	P51787	Q	367	H	not provided
1867	KV	KCNQ1	P51787	Q	530	P	Uncertain significance
1868	KV	KCNQ1	P51787	Q	544	L	Uncertain significance
1869	KV	KCNQ1	P51787	Q	547	R	not provided
1870	KV	KCNQ1	P51787	Q	604	L	Uncertain significance
1871	KV	KCNQ1	P51787	R	116	H	Uncertain significance
1872	KV	KCNQ1	P51787	R	14	C	not provided
1873	KV	KCNQ1	P51787	R	174	C	Pathogenic
1874	KV	KCNQ1	P51787	R	174	H	Likely pathogenic
1875	KV	KCNQ1	P51787	R	174	L	Likely pathogenic
1876	KV	KCNQ1	P51787	R	174	P	not provided
1877	KV	KCNQ1	P51787	R	181	C	not provided
1878	KV	KCNQ1	P51787	R	190	L	Pathogenic
1879	KV	KCNQ1	P51787	R	190	P	Uncertain significance
1880	KV	KCNQ1	P51787	R	190	Q	Pathogenic
1881	KV	KCNQ1	P51787	R	190	W	Likely pathogenic
1882	KV	KCNQ1	P51787	R	192	C	Uncertain significance
1883	KV	KCNQ1	P51787	R	192	H	Conflicting interpretations of pathogenicity
1884	KV	KCNQ1	P51787	R	192	P	not provided
1885	KV	KCNQ1	P51787	R	195	Q	Conflicting interpretations of pathogenicity
1886	KV	KCNQ1	P51787	R	195	W	Uncertain significance
1887	KV	KCNQ1	P51787	R	231	C	Pathogenic
1888	KV	KCNQ1	P51787	R	231	H	Pathogenic
1889	KV	KCNQ1	P51787	R	231	L	Likely pathogenic
1890	KV	KCNQ1	P51787	R	231	S	Pathogenic
1891	KV	KCNQ1	P51787	R	243	C	Pathogenic
1892	KV	KCNQ1	P51787	R	243	H	not provided
1893	KV	KCNQ1	P51787	R	243	P	Pathogenic
1894	KV	KCNQ1	P51787	R	243	S	Uncertain significance
1895	KV	KCNQ1	P51787	R	259	C	Pathogenic
1896	KV	KCNQ1	P51787	R	259	H	Pathogenic
1897	KV	KCNQ1	P51787	R	259	L	Likely pathogenic
1898	KV	KCNQ1	P51787	R	293	C	Conflicting interpretations of pathogenicity
1899	KV	KCNQ1	P51787	R	293	H	Likely benign
1900	KV	KCNQ1	P51787	R	360	G	not provided
1901	KV	KCNQ1	P51787	R	360	M	not provided
1902	KV	KCNQ1	P51787	R	360	T	not provided
1903	KV	KCNQ1	P51787	R	360	W	Likely pathogenic
1904	KV	KCNQ1	P51787	R	366	P	not provided
1905	KV	KCNQ1	P51787	R	366	Q	not provided
1906	KV	KCNQ1	P51787	R	366	W	Pathogenic
1907	KV	KCNQ1	P51787	R	380	G	not provided
1908	KV	KCNQ1	P51787	R	380	S	Likely pathogenic
1909	KV	KCNQ1	P51787	R	380	W	Uncertain significance
1910	KV	KCNQ1	P51787	R	397	Q	Likely pathogenic
1911	KV	KCNQ1	P51787	R	397	W	Conflicting interpretations of pathogenicity
1912	KV	KCNQ1	P51787	R	401	Q	Uncertain significance
1913	KV	KCNQ1	P51787	R	401	W	Uncertain significance
1914	KV	KCNQ1	P51787	R	451	Q	Uncertain significance
1915	KV	KCNQ1	P51787	R	451	W	Uncertain significance
1916	KV	KCNQ1	P51787	R	452	L	Pathogenic
1917	KV	KCNQ1	P51787	R	452	Q	Uncertain significance
1918	KV	KCNQ1	P51787	R	452	W	Uncertain significance
1919	KV	KCNQ1	P51787	R	507	Q	Uncertain significance
1920	KV	KCNQ1	P51787	R	511	Q	Uncertain significance
1921	KV	KCNQ1	P51787	R	511	W	not provided
1922	KV	KCNQ1	P51787	R	518	G	Uncertain significance
1923	KV	KCNQ1	P51787	R	518	P	Uncertain significance
1924	KV	KCNQ1	P51787	R	518	Q	Uncertain significance
1925	KV	KCNQ1	P51787	R	519	C	Uncertain significance
1926	KV	KCNQ1	P51787	R	519	H	Uncertain significance
1927	KV	KCNQ1	P51787	R	533	Q	Uncertain significance
1928	KV	KCNQ1	P51787	R	533	W	Conflicting interpretations of pathogenicity
1929	KV	KCNQ1	P51787	R	539	Q	Conflicting interpretations of pathogenicity
1930	KV	KCNQ1	P51787	R	539	W	Pathogenic
1931	KV	KCNQ1	P51787	R	555	C	Pathogenic
1932	KV	KCNQ1	P51787	R	555	H	Pathogenic
1933	KV	KCNQ1	P51787	R	555	S	Likely pathogenic
1934	KV	KCNQ1	P51787	R	561	K	Likely pathogenic
1935	KV	KCNQ1	P51787	R	562	M	not provided
1936	KV	KCNQ1	P51787	R	562	S	Pathogenic
1937	KV	KCNQ1	P51787	R	583	C	Pathogenic
1938	KV	KCNQ1	P51787	R	583	H	Uncertain significance
1939	KV	KCNQ1	P51787	R	591	C	not provided
1940	KV	KCNQ1	P51787	R	591	H	Pathogenic
1941	KV	KCNQ1	P51787	R	591	L	Pathogenic
1942	KV	KCNQ1	P51787	R	594	P	Conflicting interpretations of pathogenicity
1943	KV	KCNQ1	P51787	R	594	Q	Pathogenic
1944	KV	KCNQ1	P51787	S	140	G	Pathogenic
1945	KV	KCNQ1	P51787	S	143	F	Uncertain significance
1946	KV	KCNQ1	P51787	S	199	A	not provided
1947	KV	KCNQ1	P51787	S	209	F	not provided
1948	KV	KCNQ1	P51787	S	209	P	Pathogenic
1949	KV	KCNQ1	P51787	S	217	F	Uncertain significance
1950	KV	KCNQ1	P51787	S	225	L	Pathogenic
1951	KV	KCNQ1	P51787	S	253	C	Pathogenic
1952	KV	KCNQ1	P51787	S	253	F	Likely pathogenic
1953	KV	KCNQ1	P51787	S	253	P	Likely pathogenic
1954	KV	KCNQ1	P51787	S	27	R	Uncertain significance
1955	KV	KCNQ1	P51787	S	276	F	Likely pathogenic
1956	KV	KCNQ1	P51787	S	277	L	Pathogenic
1957	KV	KCNQ1	P51787	S	277	P	not provided
1958	KV	KCNQ1	P51787	S	277	W	Pathogenic
1959	KV	KCNQ1	P51787	S	338	F	Likely pathogenic
1960	KV	KCNQ1	P51787	S	349	P	not provided
1961	KV	KCNQ1	P51787	S	349	W	Pathogenic
1962	KV	KCNQ1	P51787	S	373	P	not provided
1963	KV	KCNQ1	P51787	S	389	A	Uncertain significance
1964	KV	KCNQ1	P51787	S	389	P	not provided
1965	KV	KCNQ1	P51787	S	389	Y	not provided
1966	KV	KCNQ1	P51787	S	402	N	Uncertain significance
1967	KV	KCNQ1	P51787	S	463	T	Uncertain significance
1968	KV	KCNQ1	P51787	S	484	T	not provided
1969	KV	KCNQ1	P51787	S	546	L	Pathogenic
1970	KV	KCNQ1	P51787	S	566	F	Likely pathogenic
1971	KV	KCNQ1	P51787	S	566	P	not provided
1972	KV	KCNQ1	P51787	S	566	Y	Conflicting interpretations of pathogenicity
1973	KV	KCNQ1	P51787	S	571	L	not provided
1974	KV	KCNQ1	P51787	S	66	F	not provided
1975	KV	KCNQ1	P51787	S	77	F	Uncertain significance
1976	KV	KCNQ1	P51787	S	92	P	Uncertain significance
1977	KV	KCNQ1	P51787	T	144	A	Conflicting interpretations of pathogenicity
1978	KV	KCNQ1	P51787	T	153	M	Uncertain significance
1979	KV	KCNQ1	P51787	T	169	M	Uncertain significance
1980	KV	KCNQ1	P51787	T	169	R	not provided
1981	KV	KCNQ1	P51787	T	224	M	not provided
1982	KV	KCNQ1	P51787	T	265	I	Pathogenic
1983	KV	KCNQ1	P51787	T	309	I	not provided
1984	KV	KCNQ1	P51787	T	309	R	not provided
1985	KV	KCNQ1	P51787	T	309	S	not provided
1986	KV	KCNQ1	P51787	T	311	A	not provided
1987	KV	KCNQ1	P51787	T	311	I	not provided
1988	KV	KCNQ1	P51787	T	312	I	Pathogenic
1989	KV	KCNQ1	P51787	T	312	S	Likely pathogenic
1990	KV	KCNQ1	P51787	T	322	A	Pathogenic
1991	KV	KCNQ1	P51787	T	322	K	not provided
1992	KV	KCNQ1	P51787	T	322	M	Pathogenic
1993	KV	KCNQ1	P51787	T	322	R	Pathogenic
1994	KV	KCNQ1	P51787	T	391	I	not provided
1995	KV	KCNQ1	P51787	T	432	I	Uncertain significance
1996	KV	KCNQ1	P51787	T	513	S	Uncertain significance
1997	KV	KCNQ1	P51787	T	587	M	Pathogenic
[truncated: 2,292 more rows]
